# Supplementary material for: Imidazole fused phenanthroline (PIP) ligands for the preparation of multimodal Re(i) and 99mTc(i) probes
Source: Royal Society of Chemistry journal article supplement (doi:10.1039/d0dt02829k), 2020-01-01
Supplement: d0dt02829k1.pdf [file d0dt02829k1.pdf]

## Supplementary Information

### **Imidazole Fused Phenanthroline (PIP) Ligands for the Preparation of Multimodal Re(I) and <sup>99m</sup>Tc(I) Probes**

*Samantha R. Slikboer<sup>a</sup>, Tamil Selvi Pitchumony<sup>a</sup>, Laura Banevicius<sup>a</sup>, Natalie Mercanti<sup>a</sup>, Patricia E. Edem<sup>a</sup>,  
and John F. Valliant<sup>a</sup>*

<sup>a</sup>Department of Chemistry and Chemical Biology, and the Centre for Probe Development and Commercialization, McMaster University, 1280 Main Street West, Hamilton, Ontario L8S 4M1, Canada.

## Table of Contents

|                                                                                                                         |     |
|-------------------------------------------------------------------------------------------------------------------------|-----|
| <b>Figure S1.</b> UV-HPLC trace of <b>3a</b> (Method B).                                                                | S5  |
| <b>Figure S2.</b> <sup>1</sup> H NMR spectrum ((CD <sub>3</sub> ) <sub>2</sub> SO, 600 MHz) of <b>3a</b> .              | S5  |
| <b>Figure S3.</b> <sup>13</sup> C NMR spectrum ((CD <sub>3</sub> ) <sub>2</sub> SO, 150 MHz) of the ligands <b>3a</b> . | S6  |
| <b>Figure S4.</b> HRMS of <b>3a</b> .                                                                                   | S6  |
| <b>Figure S5.</b> UV-HPLC trace of <b>3b</b> (Method B).                                                                | S7  |
| <b>Figure S6.</b> <sup>1</sup> H NMR spectrum ((CD <sub>3</sub> ) <sub>2</sub> SO, 600 MHz) of <b>3b</b> .              | S7  |
| <b>Figure S7.</b> <sup>13</sup> C NMR spectrum ((CD <sub>3</sub> ) <sub>2</sub> SO, 150 MHz) of <b>3b</b> .             | S8  |
| <b>Figure S8.</b> HRMS of <b>3b</b> .                                                                                   | S8  |
| <b>Figure S9.</b> UV-HPLC trace of <b>3c</b> (Method B).                                                                | S9  |
| <b>Figure S10.</b> <sup>1</sup> H NMR spectrum (CD <sub>3</sub> OD, 600 MHz) of <b>3c</b> .                             | S9  |
| <b>Figure S11.</b> <sup>13</sup> C NMR spectrum (CD <sub>3</sub> OD, 150 MHz) of <b>3c</b> .                            | S10 |
| <b>Figure S12.</b> HRMS of <b>3c</b> .                                                                                  | S10 |
| <b>Figure S13.</b> UV-HPLC trace of <b>3d</b> (Method B).                                                               | S11 |
| <b>Figure S14.</b> <sup>1</sup> H NMR spectrum ((CD <sub>3</sub> ) <sub>2</sub> SO, 600 MHz) of <b>3d</b> .             | S11 |
| <b>Figure S15.</b> <sup>13</sup> C NMR spectrum ((CD <sub>3</sub> ) <sub>2</sub> SO, 150 MHz) of <b>3d</b> .            | S12 |
| <b>Figure S16.</b> HRMS of <b>3d</b> .                                                                                  | S12 |
| <b>Figure S17.</b> UV-HPLC trace of <b>3e</b> (Method C).                                                               | S13 |
| <b>Figure S18.</b> <sup>1</sup> H NMR spectrum ((CD <sub>3</sub> ) <sub>2</sub> SO, 600 MHz) of <b>3e</b> .             | S13 |
| <b>Figure S19.</b> <sup>13</sup> C NMR spectrum ((CD <sub>3</sub> ) <sub>2</sub> SO, 150 MHz) of <b>3e</b> .            | S14 |
| <b>Figure S20.</b> HRMS of <b>3e</b> .                                                                                  | S14 |
| <b>Figure S21.</b> UV-HPLC trace of <b>3f</b> (Method C).                                                               | S15 |
| <b>Figure S22.</b> <sup>1</sup> H NMR ((CD <sub>3</sub> ) <sub>2</sub> SO, 600 MHz) of <b>3f</b> .                      | S15 |
| <b>Figure S23.</b> <sup>13</sup> C NMR ((CD <sub>3</sub> ) <sub>2</sub> SO, 150 MHz) of <b>3f</b> .                     | S16 |
| <b>Figure S24.</b> HRMS of <b>3f</b> .                                                                                  | S16 |
| <b>Figure S25.</b> <sup>1</sup> H NMR spectrum ((CD <sub>3</sub> ) <sub>2</sub> SO, 600 MHz) of <b>4a</b> .             | S17 |
| <b>Figure S26.</b> <sup>13</sup> C NMR spectrum ((CD <sub>3</sub> ) <sub>2</sub> SO, 150 MHz) of <b>4a</b> .            | S17 |
| <b>Figure S27.</b> HRMS of <b>4a</b> .                                                                                  | S18 |
| <b>Figure S28.</b> <sup>1</sup> H NMR spectrum ((CD <sub>3</sub> ) <sub>2</sub> SO 600 MHz) of <b>4b</b> .              | S18 |
| <b>Figure S29.</b> <sup>13</sup> C NMR spectrum (((CD <sub>3</sub> ) <sub>2</sub> SO 150 MHz) of <b>4b</b> .            | S19 |
| <b>Figure S30.</b> HRMS of <b>4b</b> .                                                                                  | S19 |
| <b>Figure S31.</b> <sup>1</sup> H NMR spectrum ((CD <sub>3</sub> ) <sub>2</sub> SO, 600 MHz) of <b>4c</b> .             | S20 |
| <b>Figure S32.</b> <sup>13</sup> C NMR spectrum ((CD <sub>3</sub> ) <sub>2</sub> SO, 150 MHz) of <b>4c</b> .            | S20 |
| <b>Figure S33.</b> HRMS of <b>4c</b> .                                                                                  | S21 |
| <b>Figure S34.</b> <sup>1</sup> H NMR spectrum ((CD <sub>3</sub> ) <sub>2</sub> SO, 600 MHz) of <b>4d</b> .             | S21 |
| <b>Figure S35.</b> <sup>13</sup> C NMR spectrum ((CD <sub>3</sub> ) <sub>2</sub> SO, 150 MHz) of <b>4d</b> .            | S22 |
| <b>Figure S36.</b> HRMS of <b>4d</b> .                                                                                  | S22 |
| <b>Figure S37.</b> <sup>1</sup> H NMR spectrum ((CD <sub>3</sub> ) <sub>2</sub> SO, 600 MHz) of <b>4e</b> .             | S23 |
| <b>Figure S38.</b> <sup>13</sup> C NMR spectrum ((CD <sub>3</sub> ) <sub>2</sub> SO, 150 MHz) of <b>4e</b> .            | S23 |
| <b>Figure S39.</b> HRMS of <b>4e</b> .                                                                                  | S24 |
| <b>Figure S40.</b> <sup>1</sup> H NMR spectrum (CD <sub>3</sub> OD, 600 MHz) of <b>5a</b> .                             | S24 |
| <b>Figure S41.</b> <sup>13</sup> C NMR spectrum (CD <sub>3</sub> OD, 150 MHz) of <b>5a</b> .                            | S25 |
| <b>Figure S42.</b> HRMS of <b>5a</b> .                                                                                  | S25 |
| <b>Figure S43.</b> <sup>1</sup> H NMR spectrum ((CD <sub>3</sub> ) <sub>2</sub> SO, 600 MHz) of <b>5b</b> .             | S26 |
| <b>Figure S44.</b> <sup>13</sup> C NMR spectrum ((CD <sub>3</sub> ) <sub>2</sub> SO, 150 MHz) of <b>5b</b> .            | S26 |
| <b>Figure S45.</b> HRMS of <b>5b</b> .                                                                                  | S27 |
| <b>Figure S46.</b> <sup>1</sup> H NMR spectrum ((CD <sub>3</sub> ) <sub>2</sub> SO 600 MHz) of <b>5c</b> .              | S27 |
| <b>Figure S47.</b> <sup>13</sup> C NMR spectrum ((CD <sub>3</sub> ) <sub>2</sub> SO 150 MHz) of <b>5c</b> .             | S28 |
| <b>Figure S48.</b> HRMS of <b>5c</b> .                                                                                  | S28 |
| <b>Figure S49.</b> UV-HPLC trace of <b>5e</b> (Method D).                                                               | S29 |

|                                                                                                                 |     |
|-----------------------------------------------------------------------------------------------------------------|-----|
| <b>Figure S50.</b> <sup>1</sup> H NMR spectrum ((CD <sub>3</sub> ) <sub>2</sub> SO, 600 MHz) of <b>5e</b> .     | S29 |
| <b>Figure S51.</b> <sup>13</sup> C NMR spectrum ((CD <sub>3</sub> ) <sub>2</sub> SO, 150 MHz) of <b>5e</b> .    | S30 |
| <b>Figure S52.</b> HRMS of <b>5e</b> .                                                                          | S30 |
| <b>Figure S53.</b> UV-HPLC trace of <b>5f</b> (Method D).                                                       | S31 |
| <b>Figure S54.</b> <sup>1</sup> H NMR spectrum ((CD <sub>3</sub> ) <sub>2</sub> SO, 600 MHz) of <b>5f</b> .     | S31 |
| <b>Figure S55.</b> <sup>13</sup> C NMR spectrum ((CD <sub>3</sub> ) <sub>2</sub> SO, 150 MHz) of <b>5f</b> .    | S32 |
| <b>Figure S56.</b> HRMS of <b>5f</b> .                                                                          | S32 |
| <b>Figure S57.</b> <sup>1</sup> H NMR spectrum ((CD <sub>3</sub> ) <sub>2</sub> SO, 600 MHz) of <b>9</b> .      | S33 |
| <b>Figure S58.</b> <sup>13</sup> C NMR spectrum ((CD <sub>3</sub> ) <sub>2</sub> SO, 150 MHz) of <b>9</b> .     | S33 |
| <b>Figure S59.</b> HRMS of <b>9</b> .                                                                           | S34 |
| <b>Figure S60.</b> <sup>1</sup> H NMR spectrum ((CD <sub>3</sub> ) <sub>2</sub> SO, 600 MHz) of <b>10</b> .     | S34 |
| <b>Figure S61.</b> <sup>13</sup> C NMR spectrum ((CD <sub>3</sub> ) <sub>2</sub> SO, 150 MHz) of <b>10</b> .    | S35 |
| <b>Figure S62.</b> HRMS of <b>10</b> .                                                                          | S35 |
| <b>Figure S63.</b> MALDI-TOF MS analysis of BSA samples. top: <b>14</b> and bottom BSA.                         | S36 |
| <b>Figure S64.</b> Absorbance spectrum of <b>4a</b> .                                                           | S36 |
| <b>Figure S65.</b> Emission spectrum of <b>4a</b> .                                                             | S37 |
| <b>Figure S66.</b> Absorbance spectrum of <b>4b</b> .                                                           | S37 |
| <b>Figure S67.</b> Emission spectrum of <b>4b</b> .                                                             | S38 |
| <b>Figure S68.</b> Absorbance spectrum of <b>4c</b> .                                                           | S38 |
| <b>Figure S69.</b> Emission spectrum of <b>4c</b> .                                                             | S39 |
| <b>Figure S70.</b> Absorbance spectrum of <b>4d</b> .                                                           | S39 |
| <b>Figure S71.</b> Emission spectrum of <b>4d</b> .                                                             | S40 |
| <b>Figure S72.</b> Absorbance spectrum of <b>4e</b> .                                                           | S40 |
| <b>Figure S73.</b> Emission spectrum of <b>4e</b> .                                                             | S41 |
| <b>Figure S74.</b> Absorbance spectrum of <b>5a</b> .                                                           | S41 |
| <b>Figure S75.</b> Emission spectrum of <b>5a</b> .                                                             | S42 |
| <b>Figure S76.</b> Absorbance spectrum of <b>5b</b> .                                                           | S42 |
| <b>Figure S77.</b> Emission spectrum of <b>5b</b> .                                                             | S43 |
| <b>Figure S78.</b> Absorbance spectrum of <b>5c</b> .                                                           | S43 |
| <b>Figure S79.</b> Emission spectrum of <b>5c</b> .                                                             | S44 |
| <b>Figure S80.</b> Absorbance spectrum of <b>5e</b> .                                                           | S44 |
| <b>Figure S81.</b> Emission spectrum of <b>5e</b> .                                                             | S45 |
| <b>Figure S82.</b> Absorbance spectrum of <b>5f</b> .                                                           | S45 |
| <b>Figure S83.</b> Emission spectrum of <b>5f</b> .                                                             | S46 |
| <b>Figure S84.</b> Absorbance spectrum of <b>9a</b> .                                                           | S46 |
| <b>Figure S85.</b> Emission spectrum of <b>9a</b> .                                                             | S47 |
| <b>Figure S86.</b> UV-HPLC trace of <b>5a</b> (top) and $\gamma$ -HPLC trace of <b>7a</b> (bottom) (Method B).  | S47 |
| <b>Figure S87.</b> $\gamma$ -HPLC trace of <b>7a</b> after 1 and 20 h in saline (Method B).                     | S48 |
| <b>Figure S88.</b> $\gamma$ -HPLC trace of <b>7a</b> with histidine challenge (Method B).                       | S49 |
| <b>Figure S89.</b> UV-HPLC trace of <b>5b</b> (top) and $\gamma$ -HPLC trace of <b>7b</b> (bottom) (Method B).  | S50 |
| <b>Figure S90.</b> $\gamma$ -HPLC trace after 1, 2, and 19 h in saline (Method B).                              | S50 |
| <b>Figure S91.</b> $\gamma$ -HPLC trace of <b>7b</b> after 1, 3, and 5 h in histidine (Method B).               | S51 |
| <b>Figure S92.</b> UV-HPLC trace of <b>5c</b> (top) and $\gamma$ -HPLC trace of <b>7c</b> (bottom) (Method B).  | S51 |
| <b>Figure S93.</b> $\gamma$ -HPLC trace of <b>7c</b> after 1 and 24 h in saline (Method B).                     | S52 |
| <b>Figure S94.</b> $\gamma$ -HPLC trace of <b>7c</b> after 1, 3, 5 h in histidine (Method B).                   | S52 |
| <b>Figure S95.</b> $\gamma$ -HPLC trace of <b>7d</b> before (top) and after 24 h (bottom) in saline (Method B). | S53 |
| <b>Figure S96.</b> $\gamma$ -HPLC trace of <b>7d</b> after 1 and 15 h in histidine (Method B).                  | S53 |
| <b>Figure S97.</b> UV-HPLC trace of <b>5e</b> (top) and $\gamma$ -HPLC trace of <b>7e</b> (bottom) (Method D).  | S54 |
| <b>Figure S98.</b> $\gamma$ -HPLC trace of <b>7e</b> after 1 and 6 h in saline (Method D).                      | S54 |
| <b>Figure S99.</b> $\gamma$ -HPLC trace of <b>7e</b> after 1 and 6 h in cysteine (Method D).                    | S55 |

|                                                                                                                 |     |
|-----------------------------------------------------------------------------------------------------------------|-----|
| <b>Figure S100.</b> UV-HPLC trace of <b>5f</b> (top) and $\gamma$ -HPLC trace of <b>7f</b> (bottom) (Method D). | S55 |
| <b>Figure S101.</b> $\gamma$ -HPLC trace of <b>7f</b> after 1 and 6 h in saline (Method D).                     | S56 |
| <b>Figure S102.</b> $\gamma$ -HPLC trace of <b>7f</b> after 1 and 6 h in cysteine (Method D).                   | S56 |
| <b>Figure S103.</b> UV-HPLC trace of <b>10</b> (top) and $\gamma$ -HPLC trace of <b>12</b> (bottom) (Method C). | S57 |
| <b>Figure S104.</b> $\gamma$ -HPLC trace of <b>12</b> after 0 and 6 h in saline (Method C).                     | S57 |
| <b>Figure S105.</b> $\gamma$ -HPLC trace of <b>12</b> after 0 and 6 h in cysteine (Method C).                   | S58 |
| <b>Figure S106.</b> $\gamma$ -HPLC trace of <b>13</b> (Method E).                                               | S58 |
| <b>Figure S107.</b> UV-HPLC trace of <b>15</b> (top) and $\gamma$ -HPLC of <b>15</b> (bottom) (Method F).       | S59 |

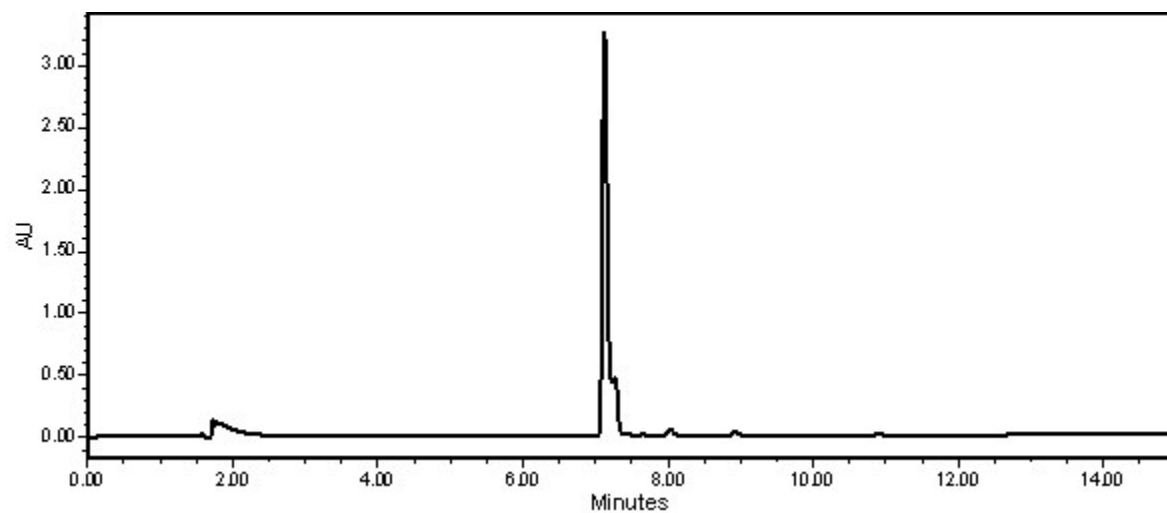

Figure S1. UV-HPLC trace of **3a** (Method B).

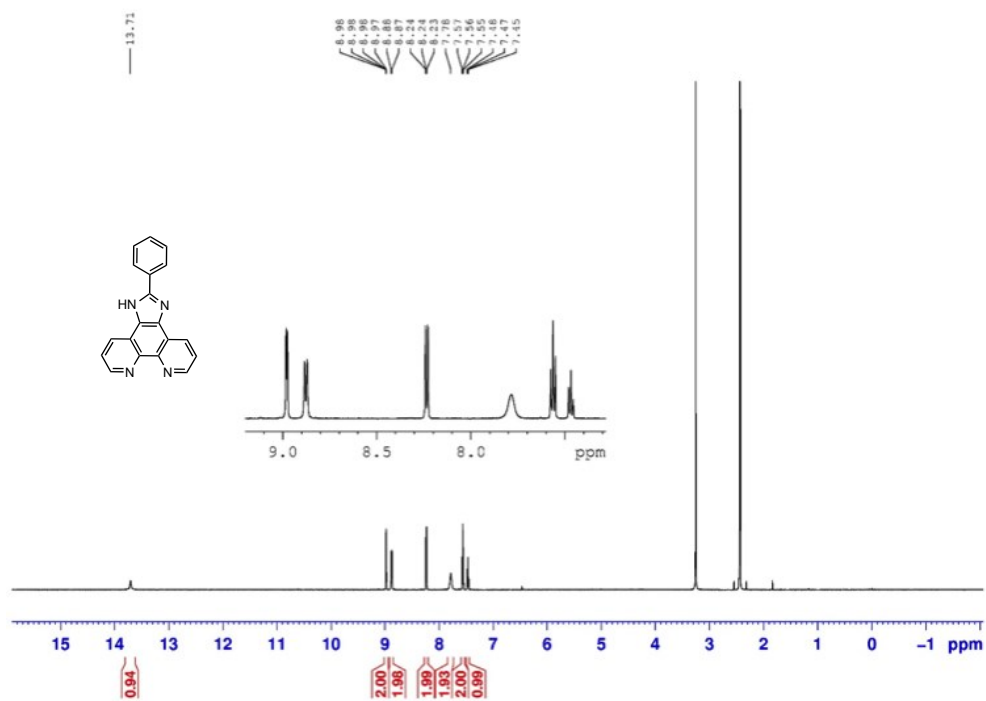

Figure S2.  $^1\text{H}$  NMR spectrum ( $(\text{CD}_3)_2\text{SO}$ , 600 MHz) of **3a**.

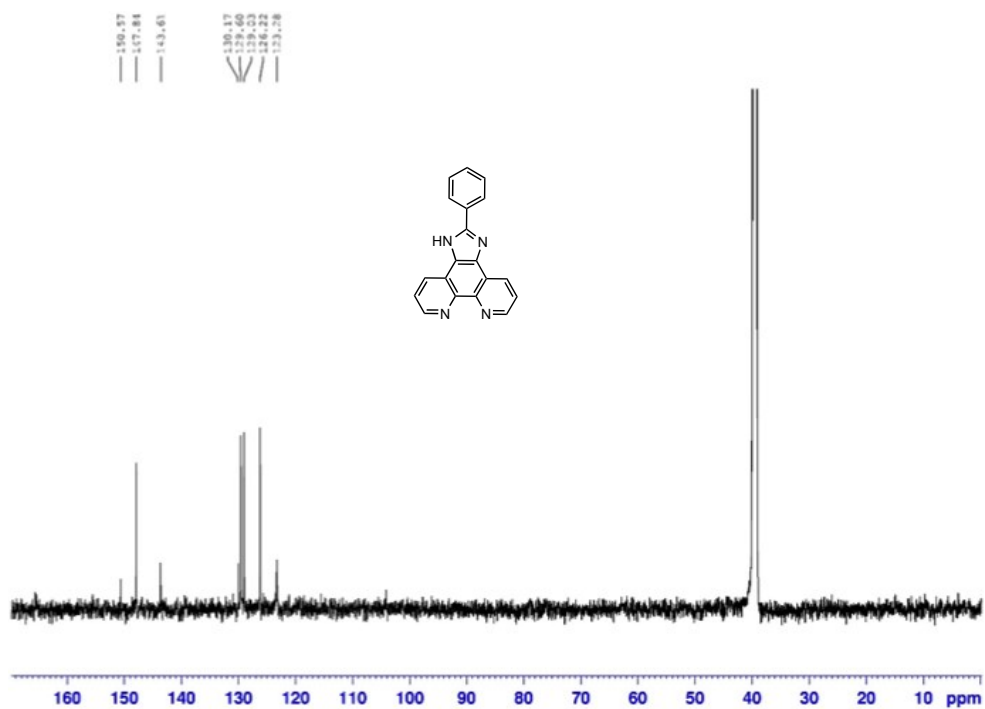

Figure S3.  $^{13}\text{C}$  NMR spectrum ( $(\text{CD}_3)_2\text{SO}$ , 150 MHz) of the ligand **3a**.

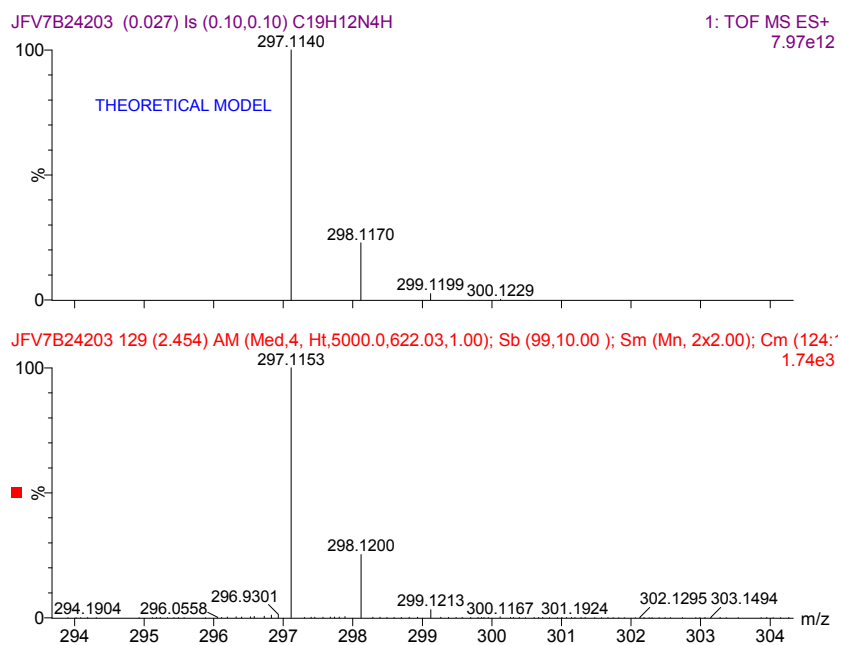

Figure S4. HRMS of **3a**.

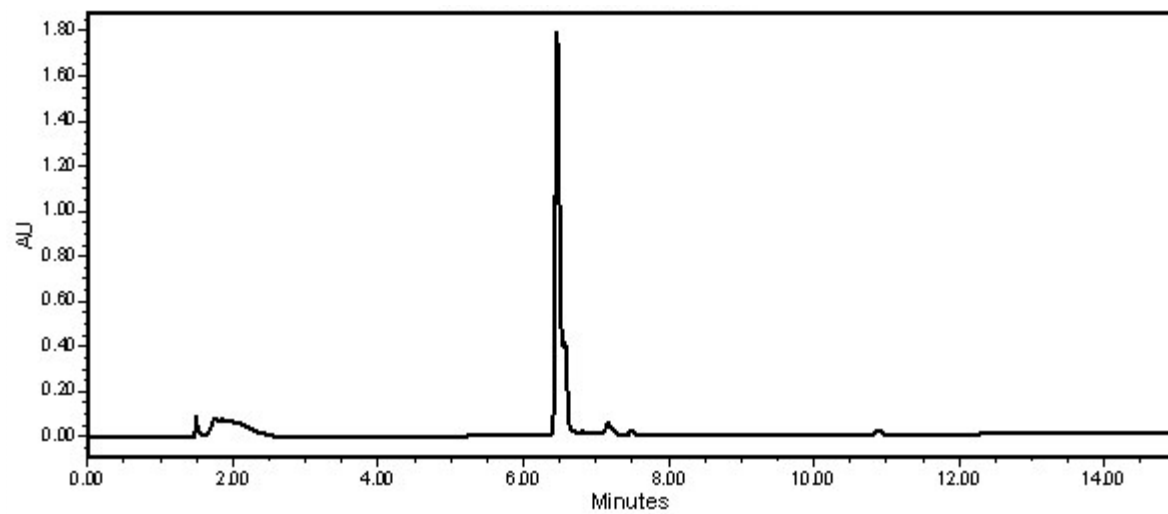

Figure S5. UV-HPLC trace of **3b** (Method B).

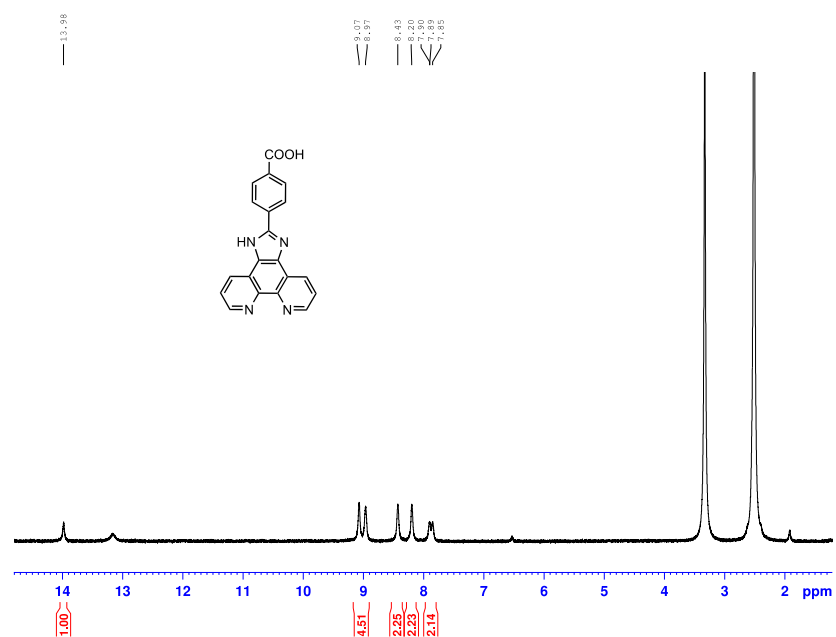

Figure S6.  $^1\text{H}$  NMR spectrum ( $(\text{CD}_3)_2\text{SO}$ , 600 MHz) of **3b**.

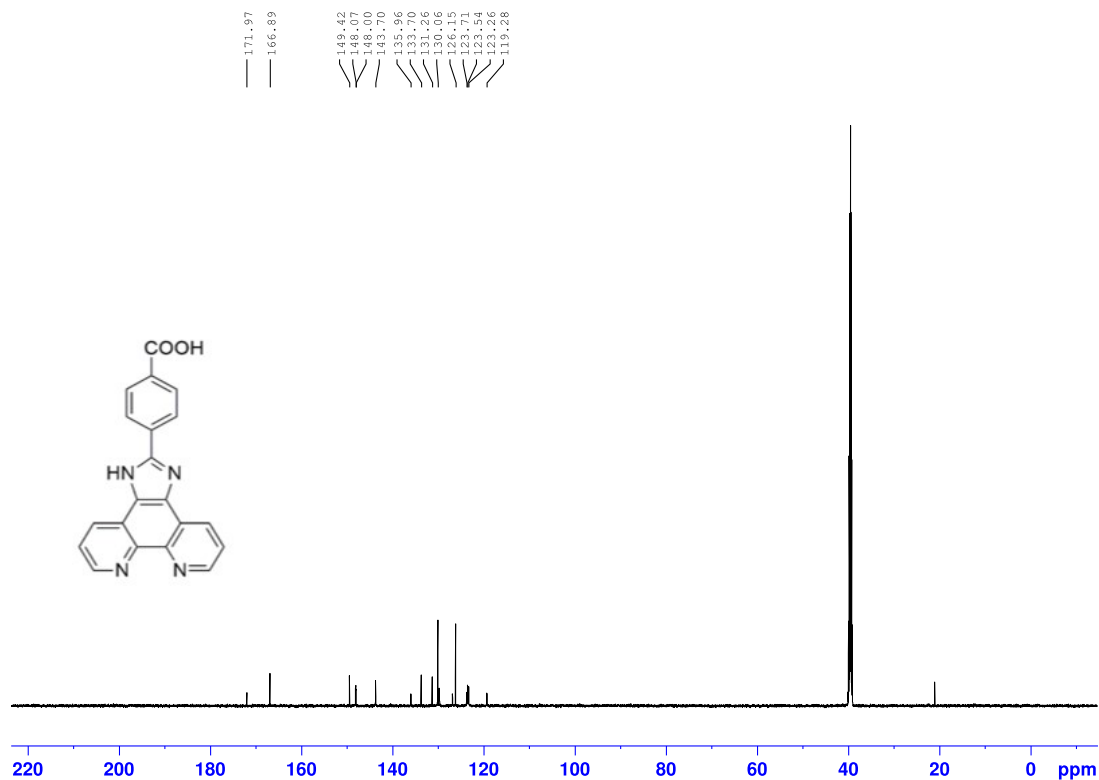

Figure S7. <sup>13</sup>C NMR spectrum ((CD<sub>3</sub>)<sub>2</sub>SO, 150 MHz) of **3b**.

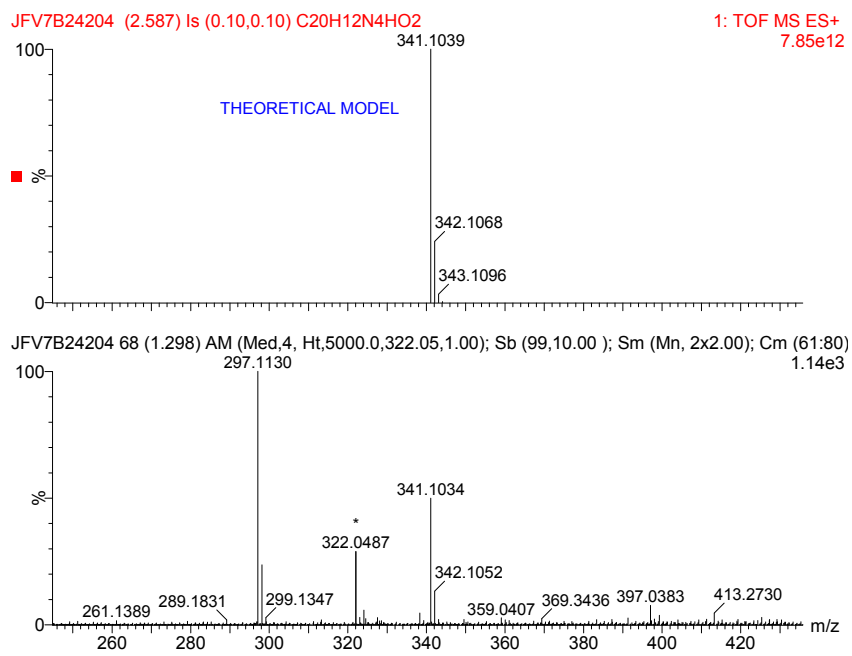

Figure S8. HRMS of **3b**.



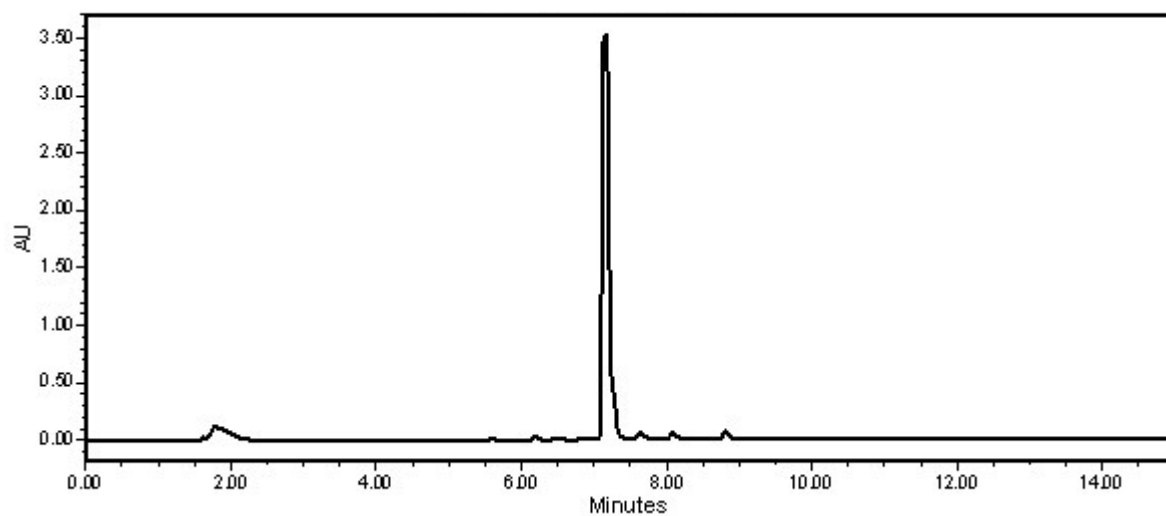

Figure S9. UV-HPLC trace of **3c** (Method B).

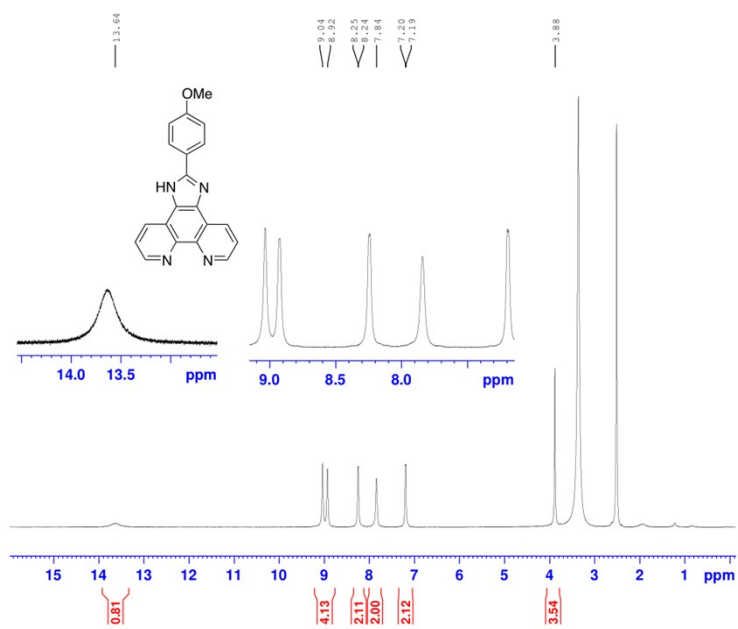

Figure S10. <sup>1</sup>H NMR spectrum (CD<sub>3</sub>OD, 600 MHz) of **3c**.

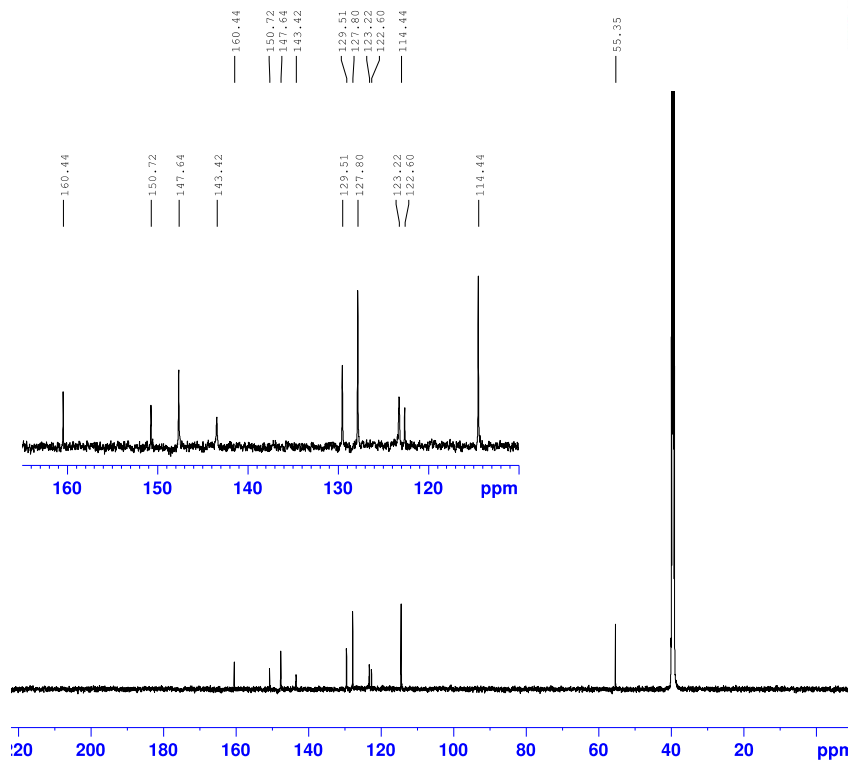

Figure S11.  $^{13}\text{C}$  NMR spectrum ( $\text{CD}_3\text{OD}$ , 150 MHz) of **3c**.

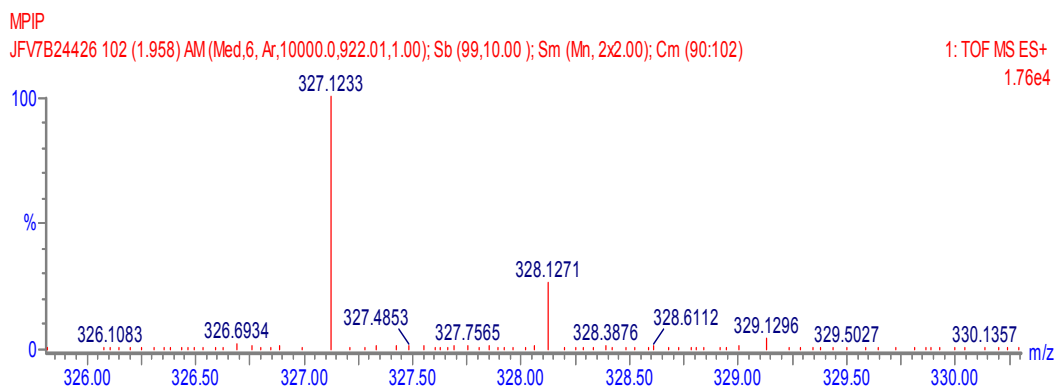

Figure S12. HRMS of **3c**.

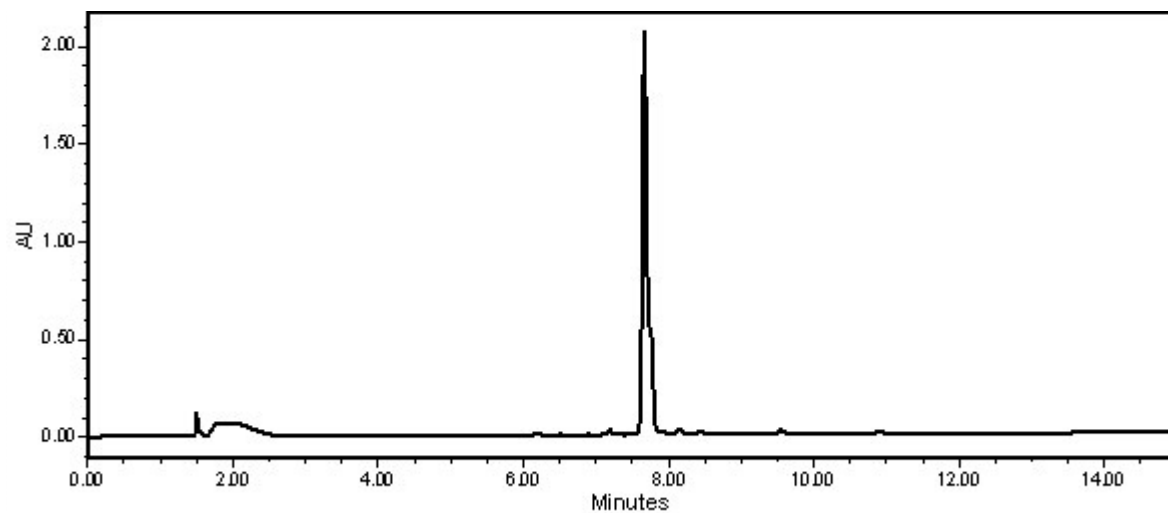

Figure S13. UV-HPLC trace of **3d** (Method B).

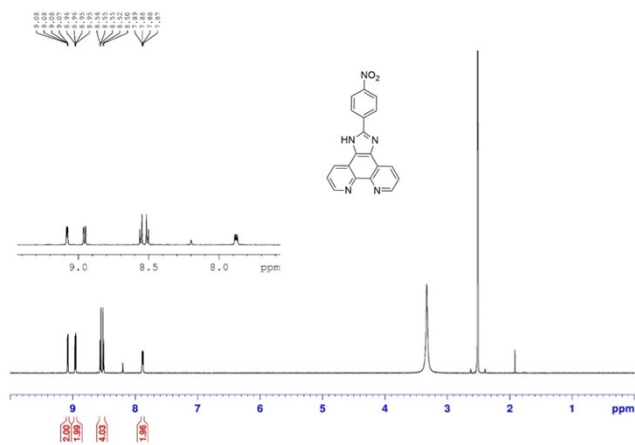

Figure S14.  $^1\text{H}$  NMR spectrum ( $(\text{CD}_3)_2\text{SO}$ , 600 MHz) of **3d**.

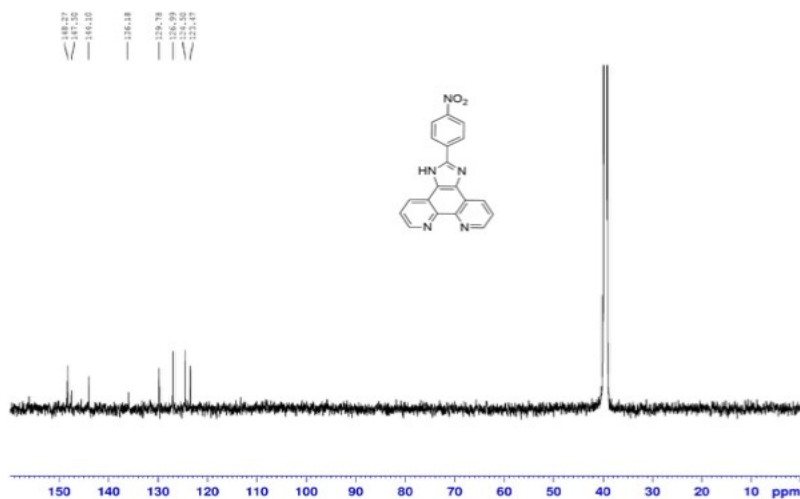

Figure S15. <sup>13</sup>C NMR spectrum ((CD<sub>3</sub>)<sub>2</sub>SO, 150 MHz) of **3d**.

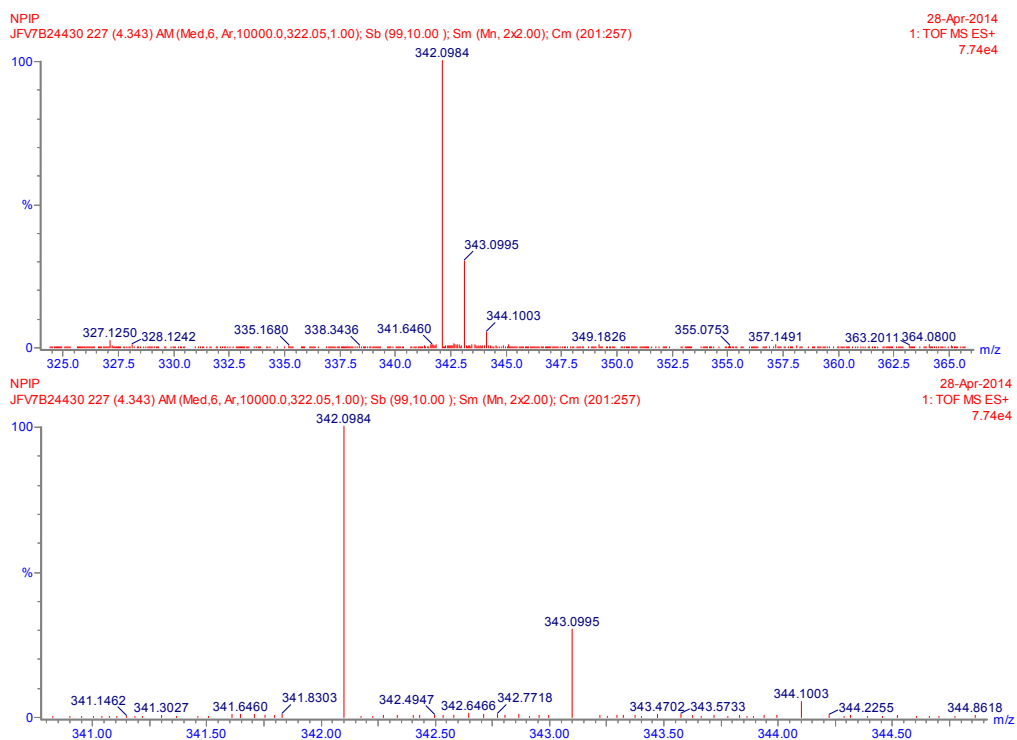

Figure S16. HRMS of **3d**.

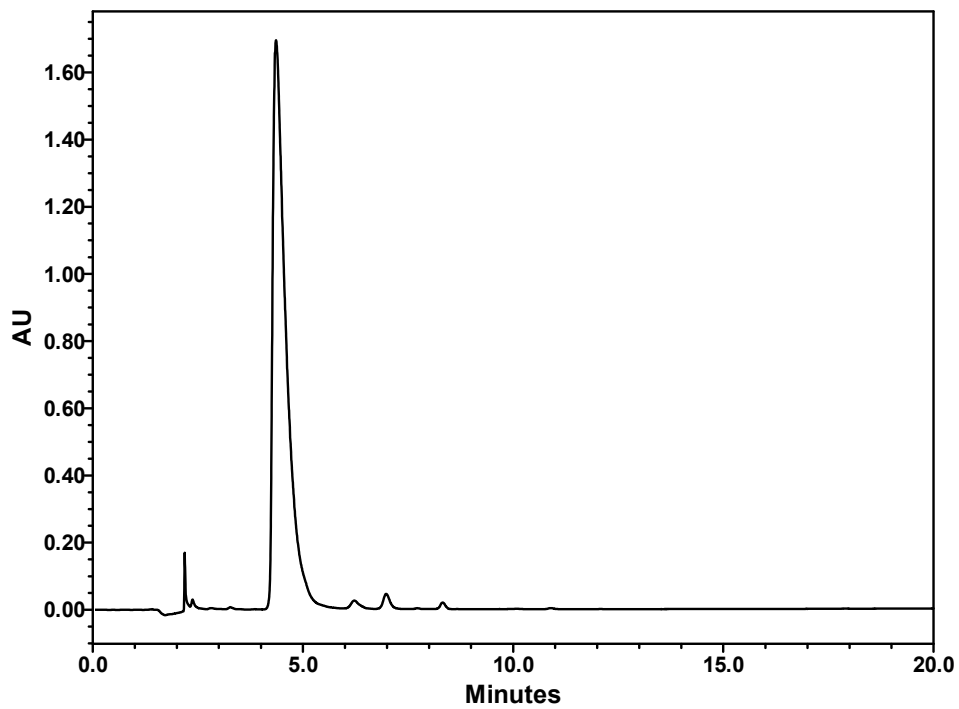

Figure S17. UV-HPLC trace of **3e** (Method C).

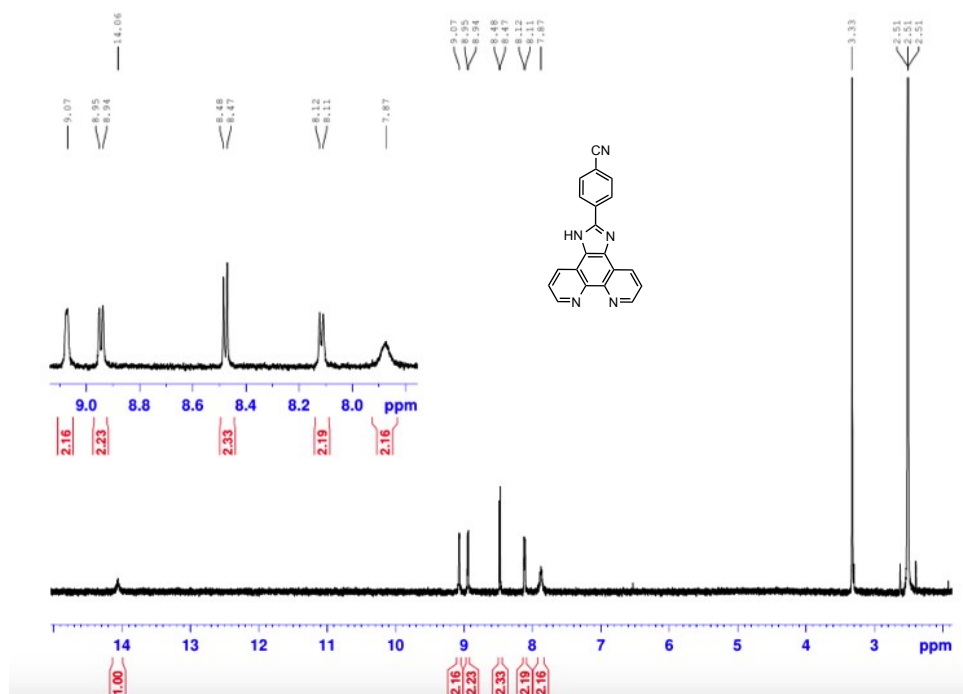

Figure S18.  $^1\text{H}$  NMR spectrum ( $(\text{CD}_3)_2\text{SO}$ , 600 MHz) of **3e**.

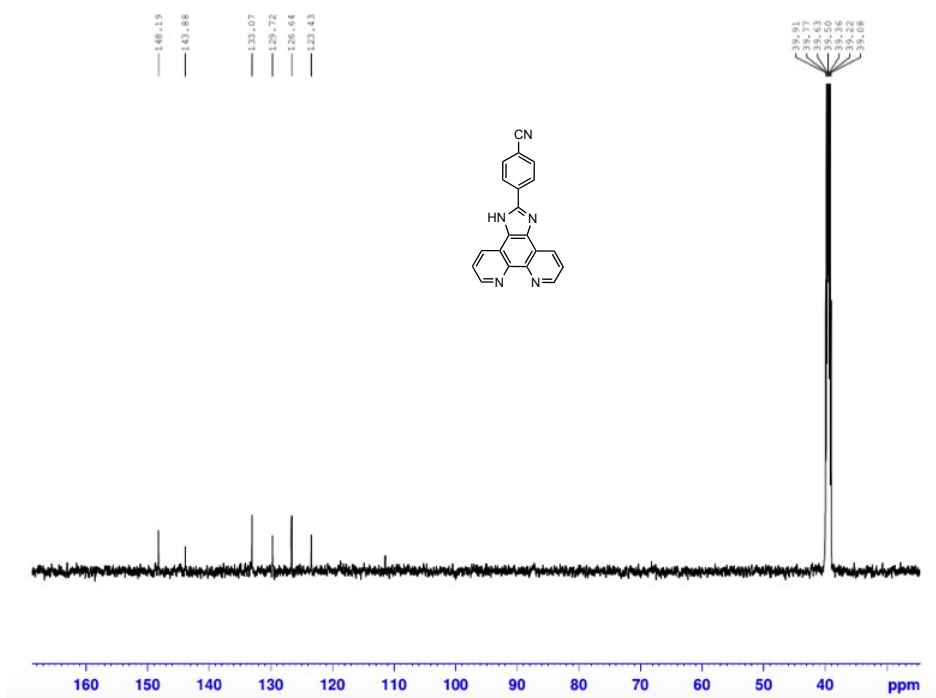

Figure S19. <sup>13</sup>C NMR spectrum ((CD<sub>3</sub>)<sub>2</sub>SO, 150 MHz) of 3e.

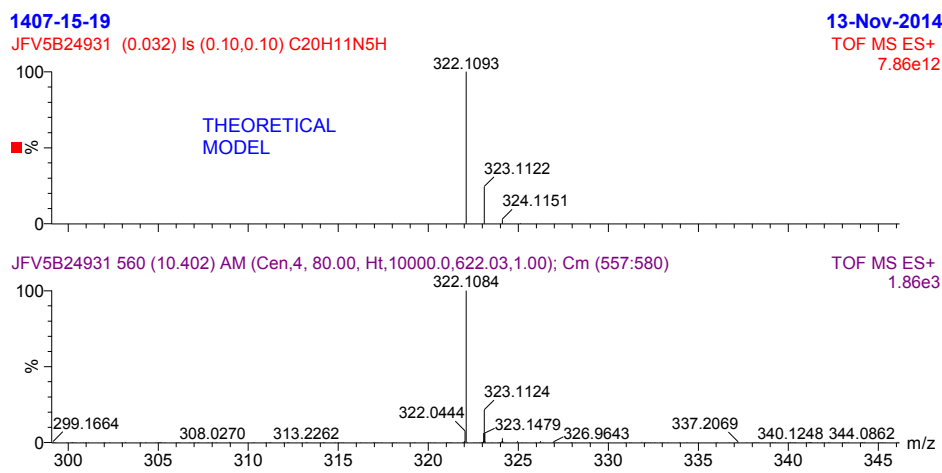

Figure S20. HRMS of 3e.

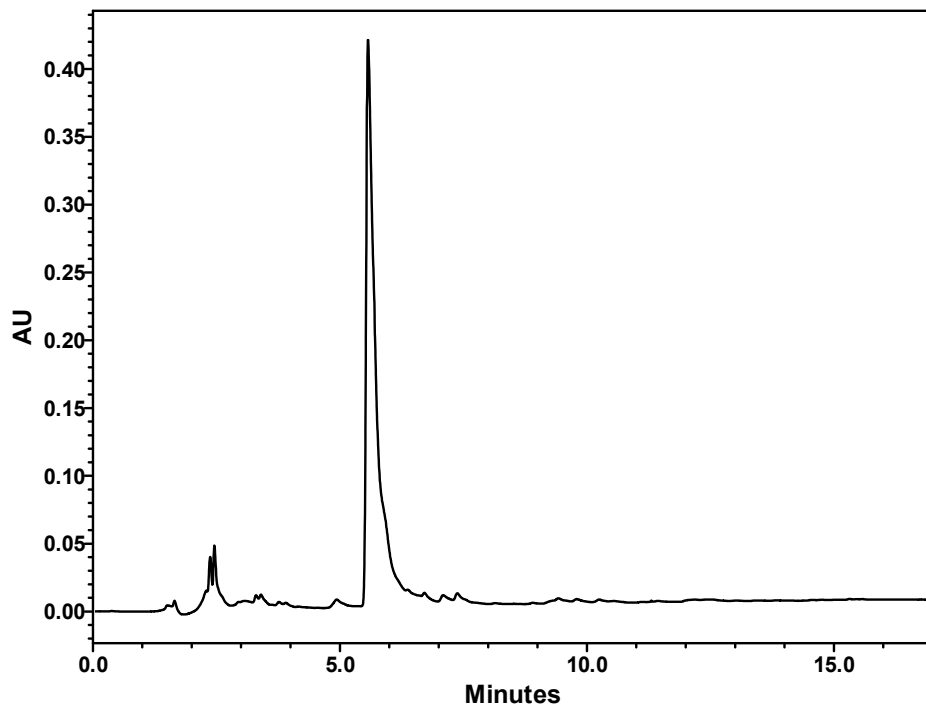

Figure S21. UV-HPLC trace of **3f** (Method C).

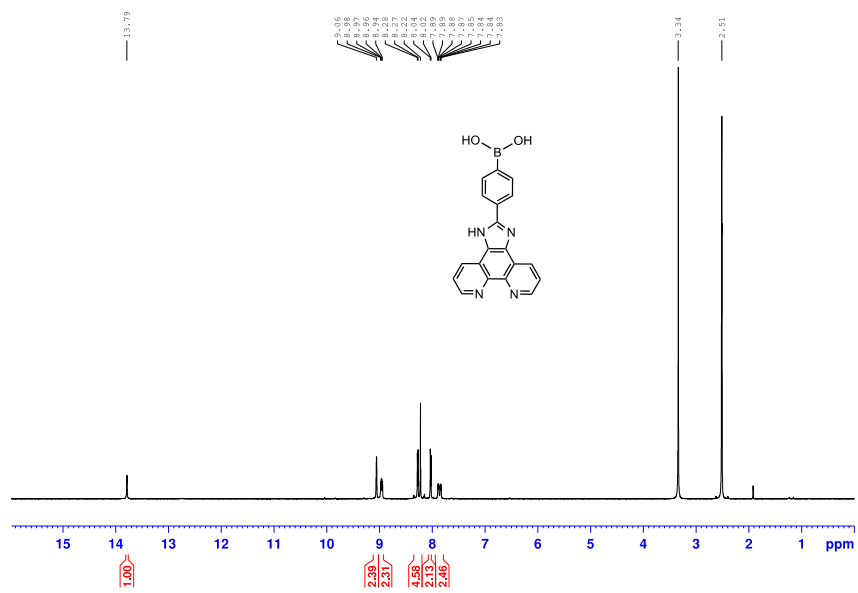

Figure S22.  $^1\text{H}$  NMR ( $(\text{CD}_3)_2\text{SO}$ ), 600 MHz) of **3f**.

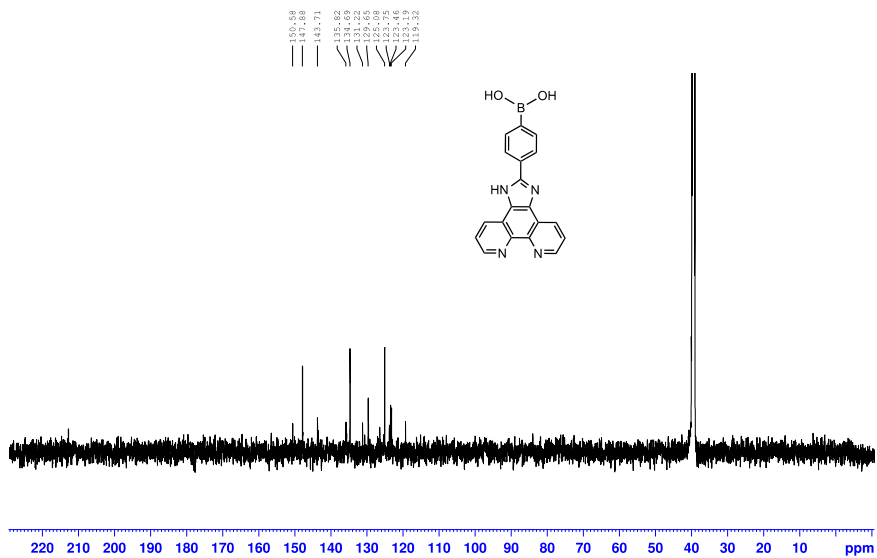

Figure S23. <sup>13</sup>C NMR ((CD<sub>3</sub>)<sub>2</sub>SO), 150 MHz) of **3f**.

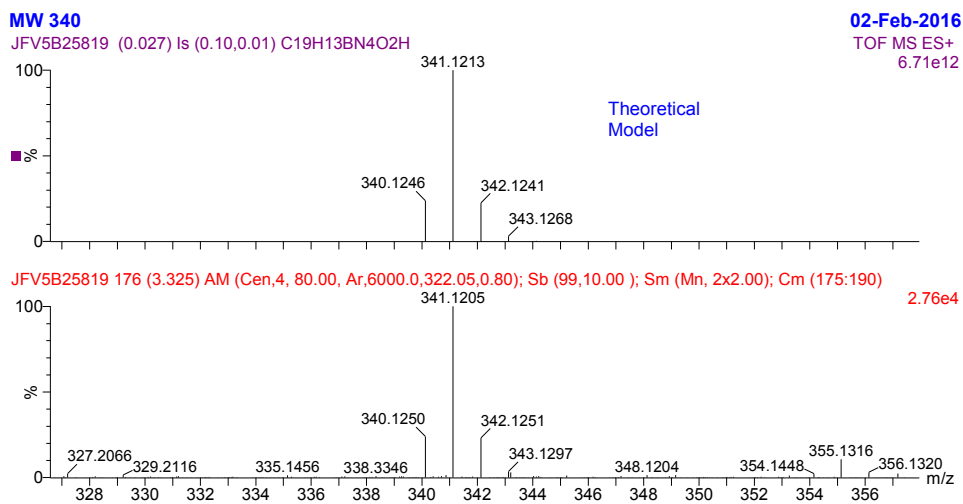

Figure S24. HRMS of **3f**.



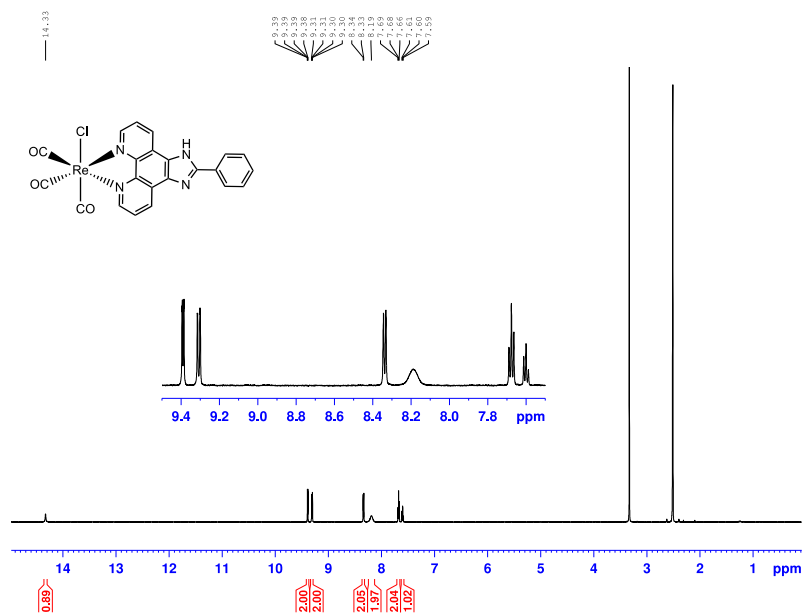

Figure S25. <sup>1</sup>H NMR spectrum ((CD<sub>3</sub>)<sub>2</sub>SO, 600 MHz) of **4a**.

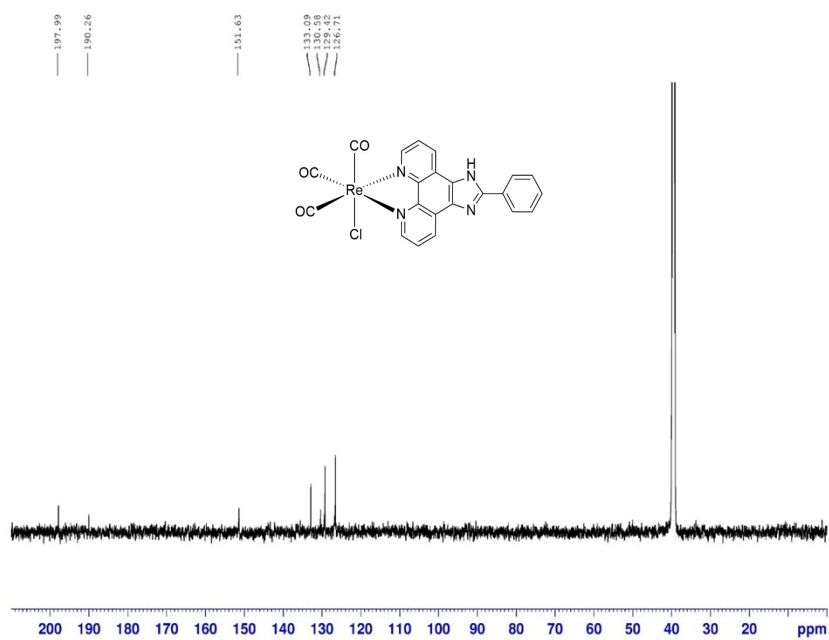

Figure S26. <sup>13</sup>C NMR spectrum ((CD<sub>3</sub>)<sub>2</sub>SO, 150 MHz) of **4a**.

RePIPCI

JFV4B24879 (0.032) Is (0.10,0.10) C22H11ClN4O3Re

29-Oct-2014

TOF MS ES-  
4.41e12

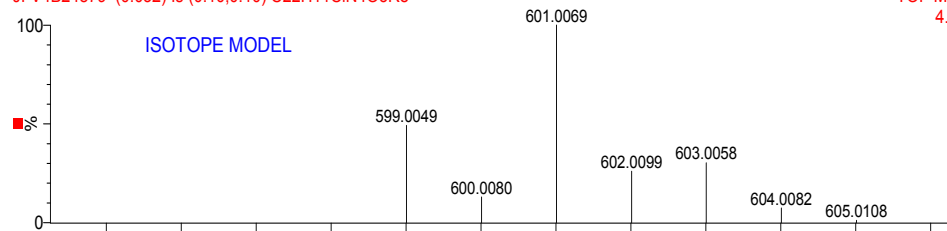

JFV4B24879 424 (8.100) AM (Cen,8, 80.00, Ht,10000.0,1033.99,1.00); Sb (99,10.00 ); Sm (Mn, 2x2.00); Cm (408:433)

TOF MS ES-  
681

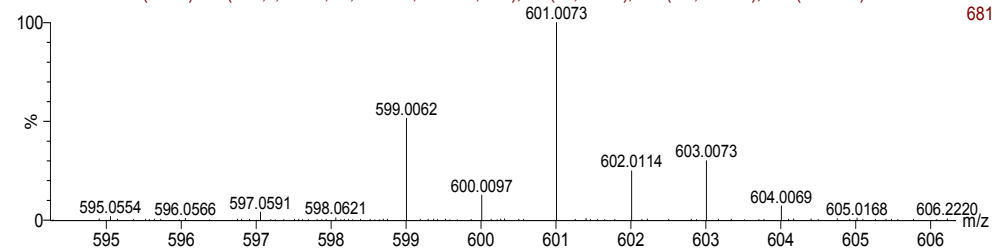

Figure S27. HRMS of **4a**.

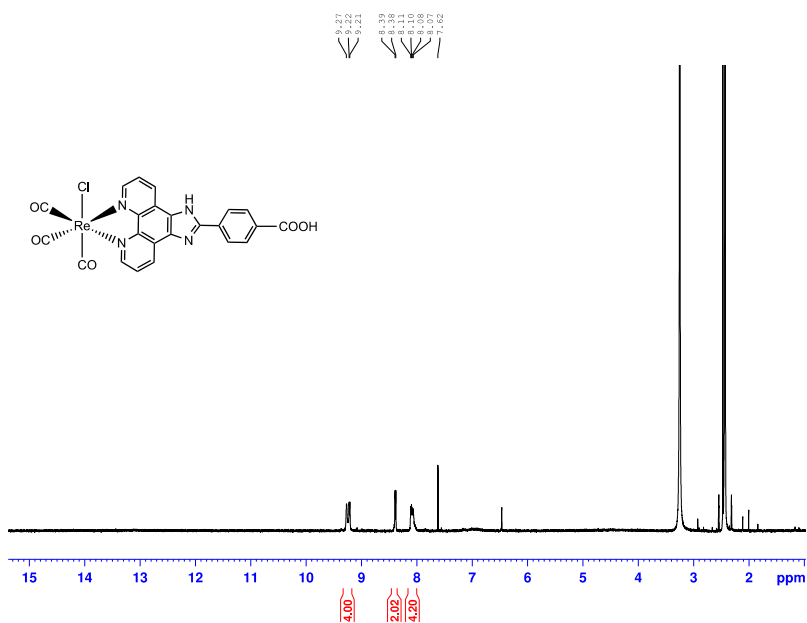

Figure S28. <sup>1</sup>H NMR spectrum ((CD<sub>3</sub>)<sub>2</sub>SO, 600 MHz) of **4b**.

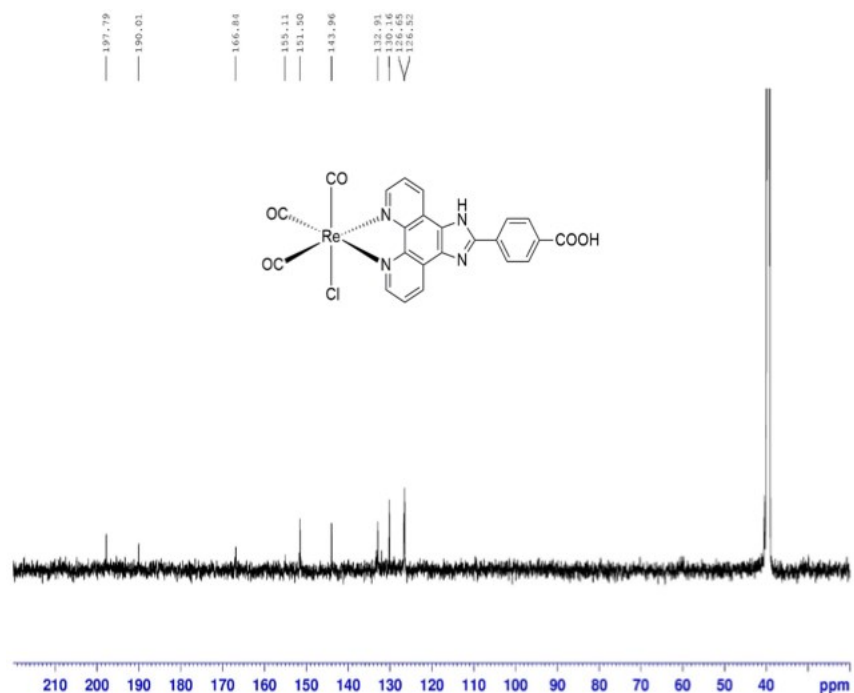

Figure S29.  $^{13}\text{C}$  NMR spectrum ( $(\text{CD}_3)_2\text{SO}$ , 150 MHz) of **4b**.

ReCPIPC

JFV4B24842 (0.032) Is (0.10,0.10) C<sub>23</sub>H<sub>11</sub>CIN<sub>4</sub>O<sub>5</sub>Re

17-Oct-2014

TOF MS ES-  
4.36e12

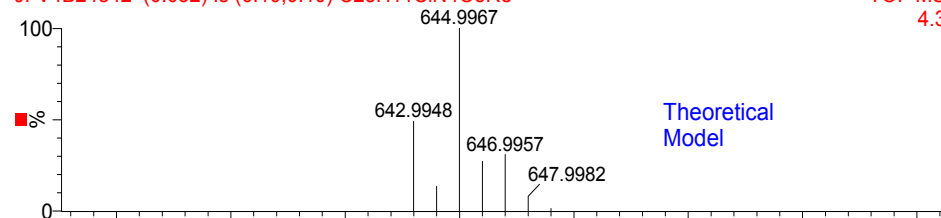

JFV4B24842 438 (8.146) AM (Med,8, Ht,10000.0,734.01,1.00); Sb (10,10.00); Sm (Mn, 2x2.00); Cm (394:51 751

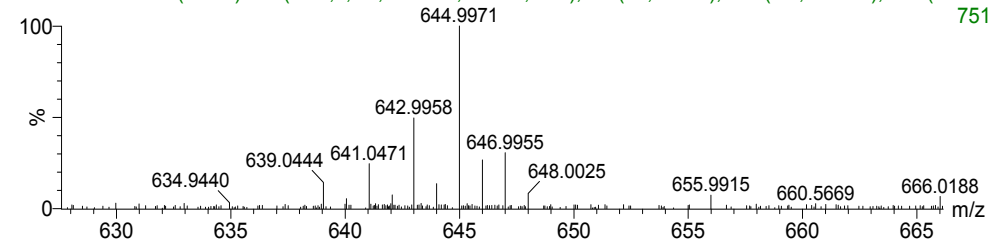

Figure S30. HRMS of **4b**.

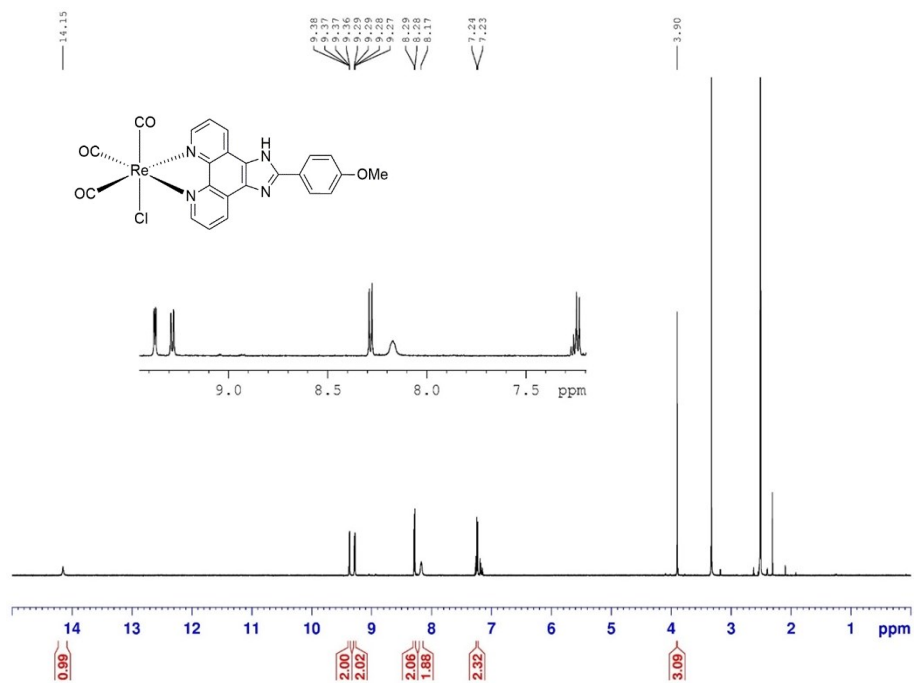

Figure S31. <sup>1</sup>H NMR spectrum ((CD<sub>3</sub>)<sub>2</sub>SO, 600 MHz) of **4c**.

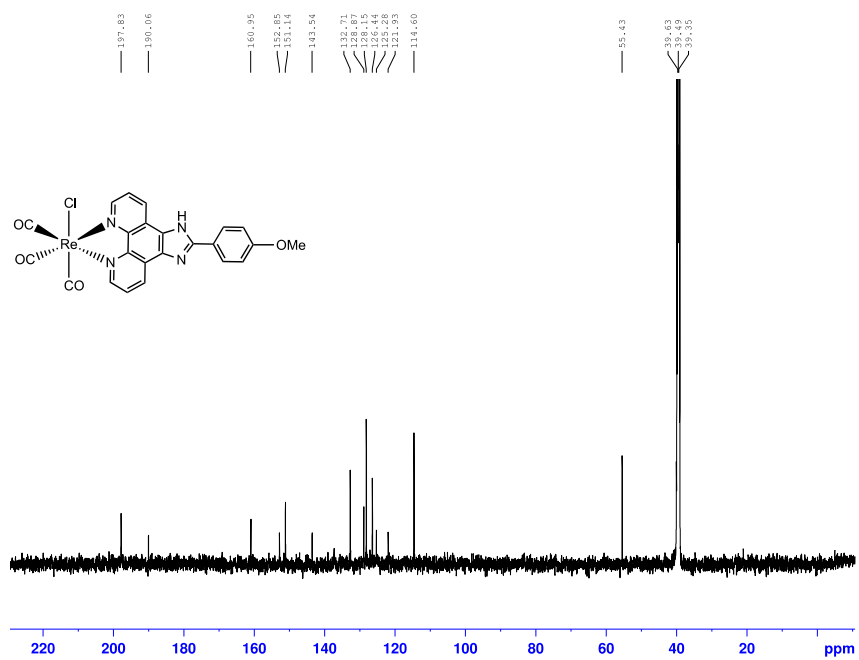

Figure S32. <sup>13</sup>C NMR spectrum ((CD<sub>3</sub>)<sub>2</sub>SO, 150 MHz) of **4c**.

**ReMPIPCI**JFVB24868A (0.032) Is (0.10,0.10) C<sub>23</sub>H<sub>13</sub>CIN<sub>4</sub>O<sub>4</sub>Re

28-Oct-2014

TOF MS ES-  
4.36e12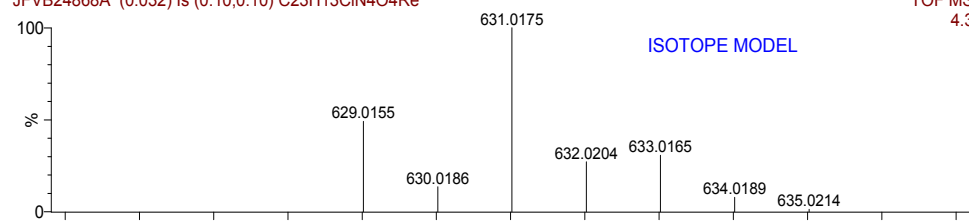

JFVB24868A 401 (7.637) AM (Cen,8, 80.00, Ht,10000.0,734.01,1.00); Sb (99,10.00); Sm (Mn, 2x2.00); Cm (334:404) TOF MS ES-187

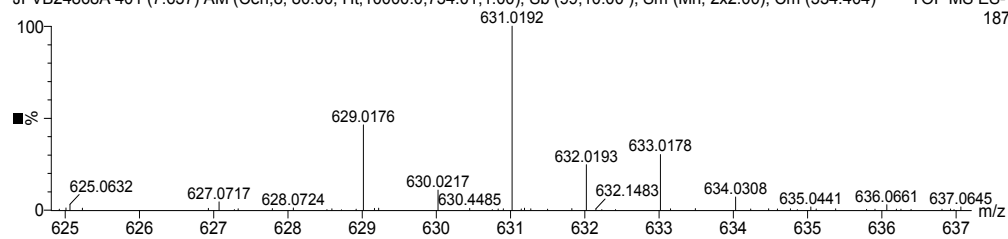Figure S33. HRMS of **4c**.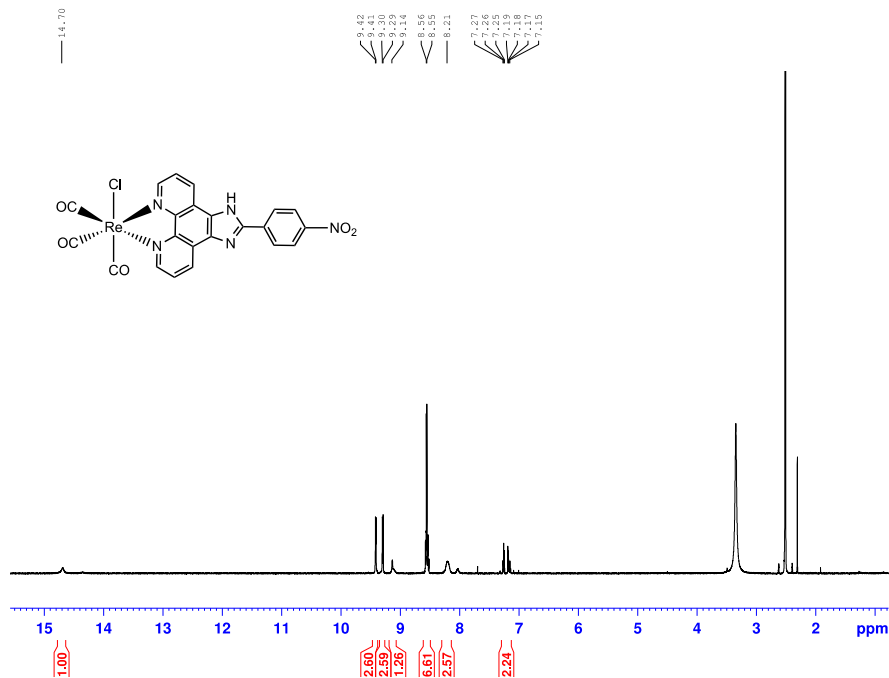Figure S34. <sup>1</sup>H NMR spectrum ((CD<sub>3</sub>)<sub>2</sub>SO, 600 MHz) of **4d**.

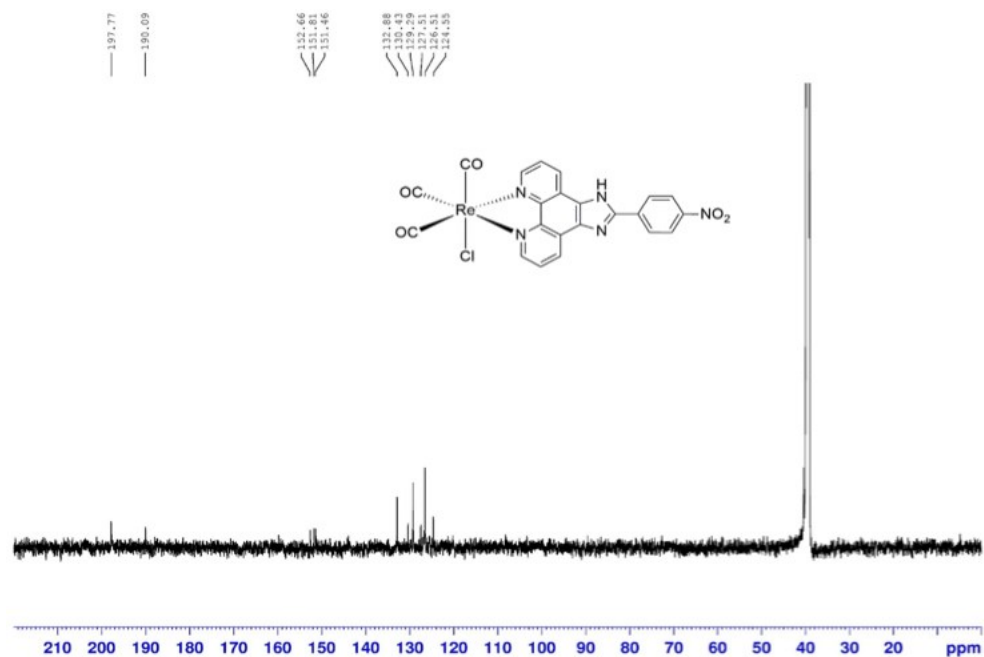

Figure S35.  $^{13}\text{C}$  NMR spectrum ( $(\text{CD}_3)_2\text{SO}$ , 150 MHz) of **4d**.

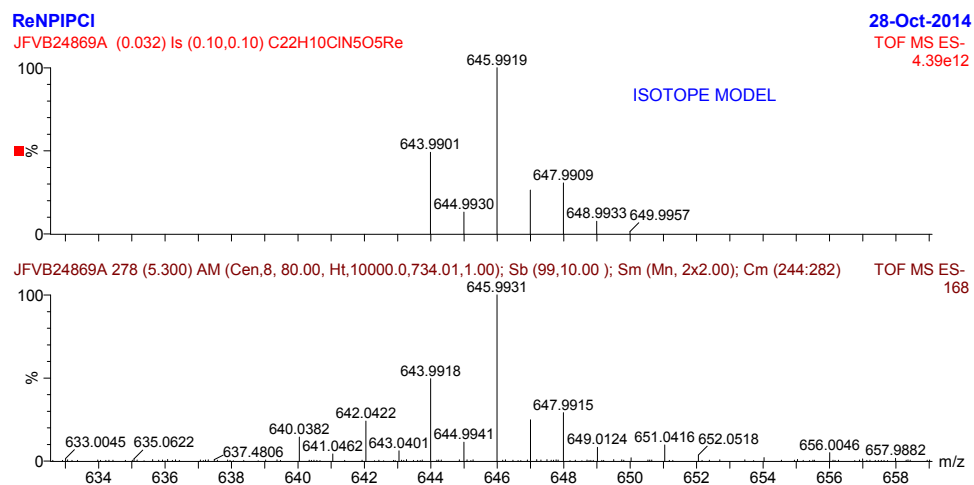

Figure S36. HRMS of **4d**.

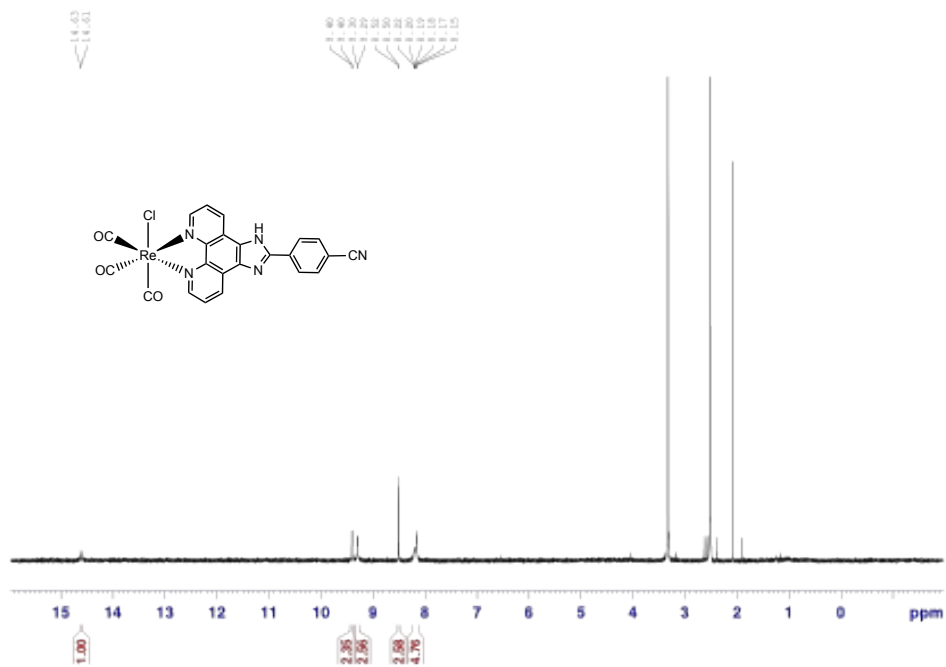

Figure S37. <sup>1</sup>H NMR spectrum ((CD<sub>3</sub>)<sub>2</sub>SO), 600 MHz) of 4e.

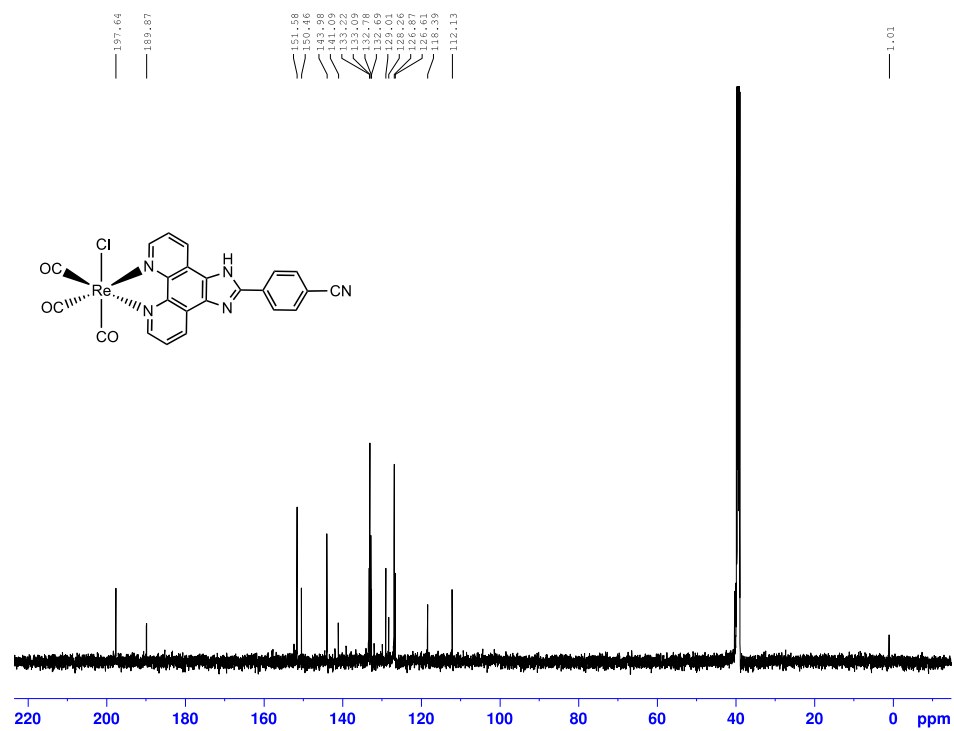

Figure S38. <sup>13</sup>C NMR spectrum ((CD<sub>3</sub>)<sub>2</sub>SO), 600 MHz) of 4e.

MW 626

JFV5B26613 (0.026) Is (0.10,0.01) C<sub>23</sub>H<sub>10</sub>CIN<sub>5</sub>O<sub>3</sub>Re

06-Oct-2016

TOF MS ES-  
4.36e12

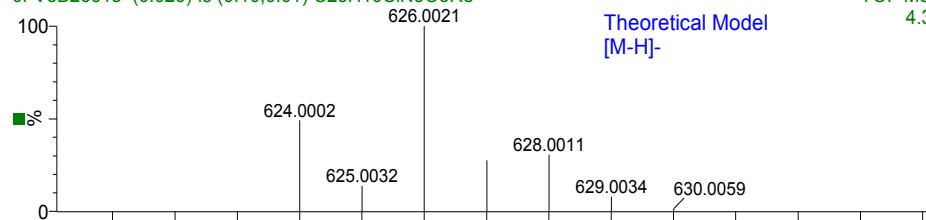

JFV5B26613 302 (5.705) AM (Cen,4, 80.00, Ar,6500.0,735.01,0.80); Sb (99,10.00 ); Sm (Mn, 2x2.00); Cm (296:314 8.52e3

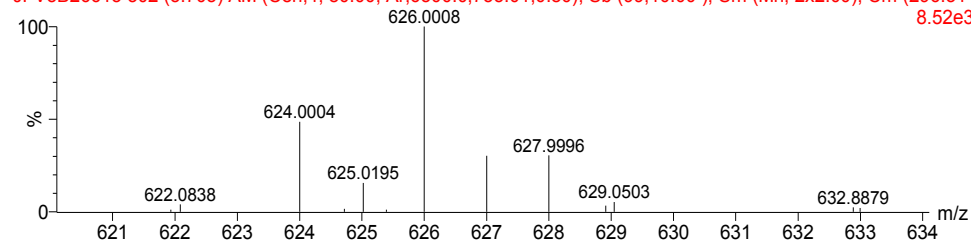

Figure S39. HRMS of 4e.

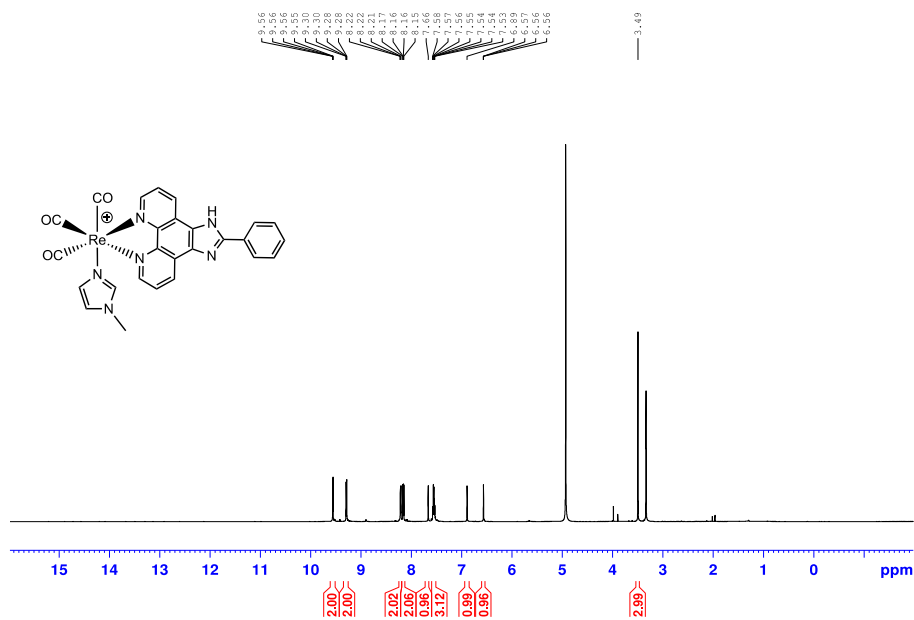

Figure S40. <sup>1</sup>H NMR spectrum (CD<sub>3</sub>OD, 600 MHz) of 5a.



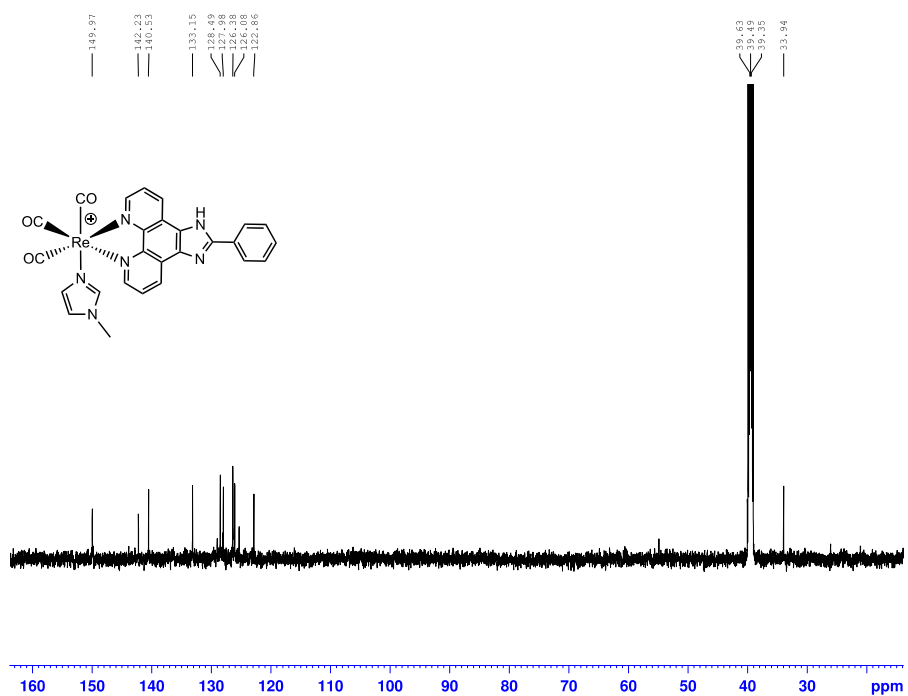

Figure S41. <sup>13</sup>C NMR spectrum ((CD<sub>3</sub>)<sub>2</sub>SO, 150 MHz) of **5a**.

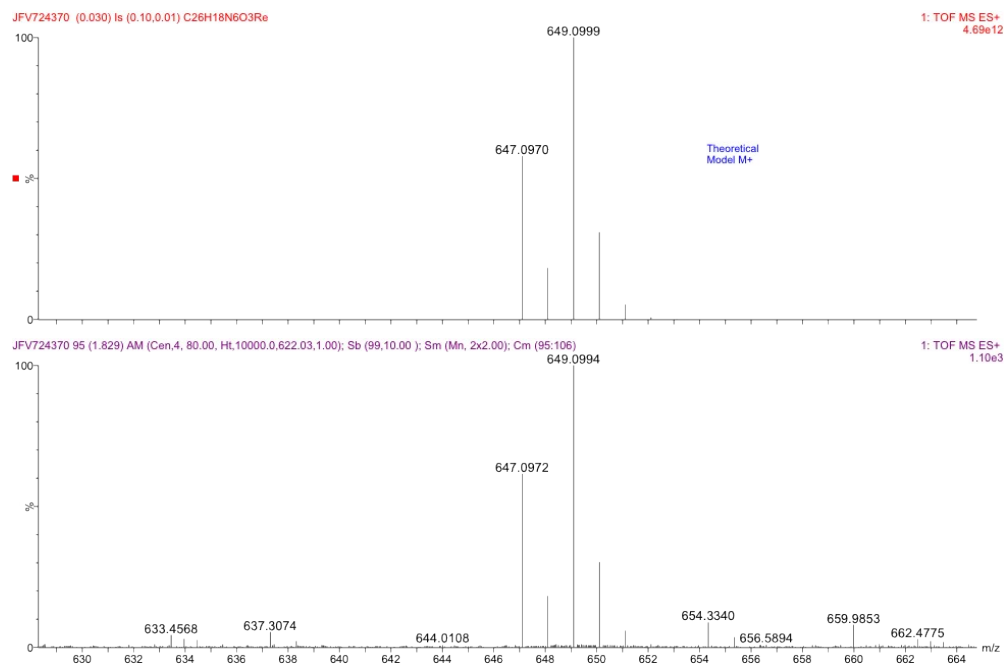

Figure S42. HRMS of **5a**.

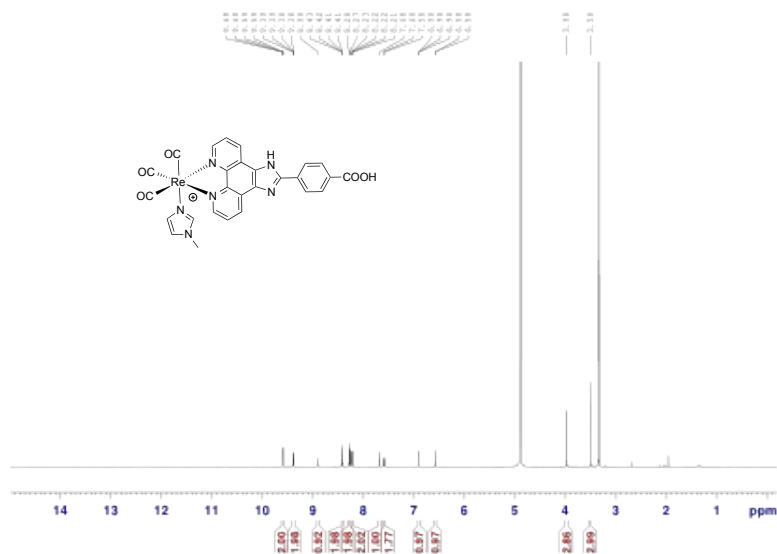

Figure S43. <sup>1</sup>H NMR spectrum (CD<sub>3</sub>OD, 600 MHz) of **5b**.

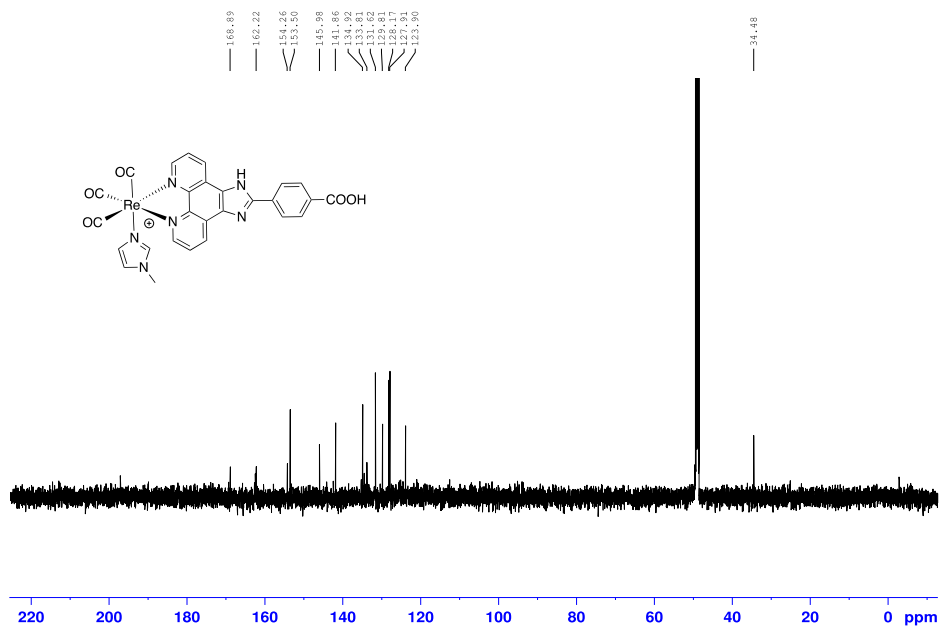

Figure S44. <sup>13</sup>C NMR spectrum (CD<sub>3</sub>OD, 150 MHz) of **5b**.

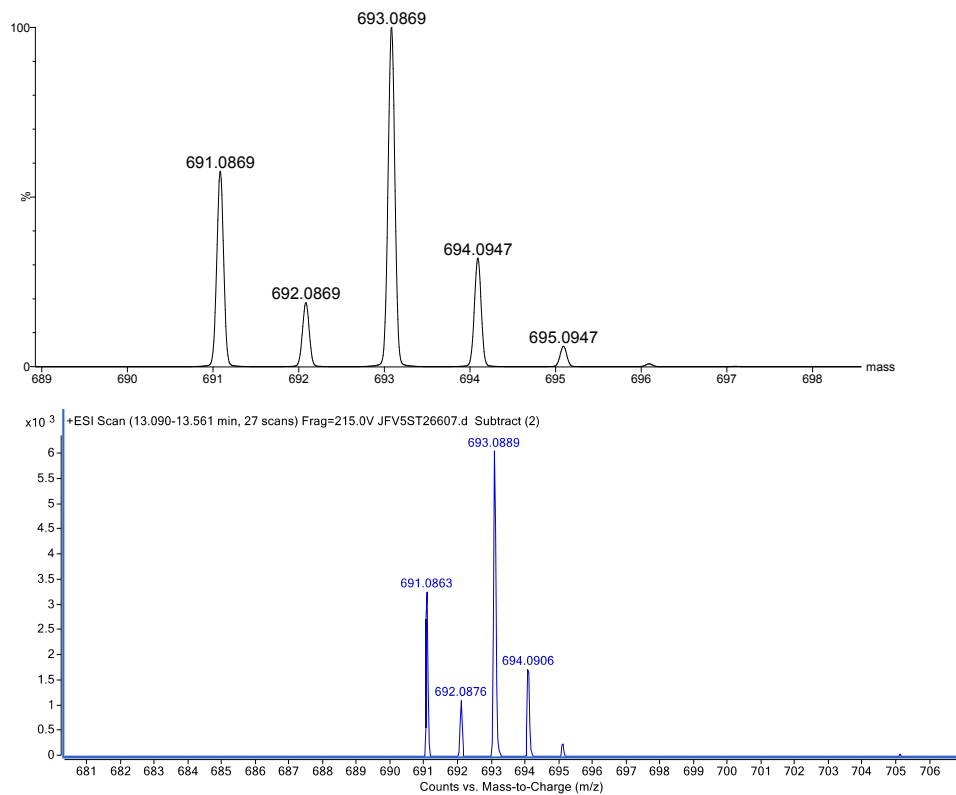

Figure S45. HRMS of **5b**.

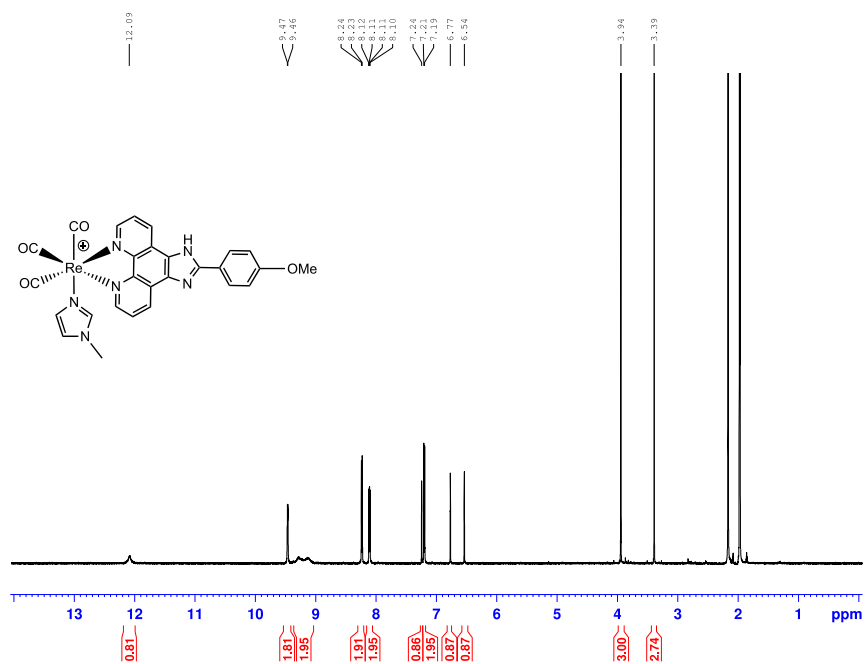

Figure S46.  $^1\text{H}$  NMR spectrum ( $\text{CD}_3\text{CN}$ , 600 MHz) of **5c**.

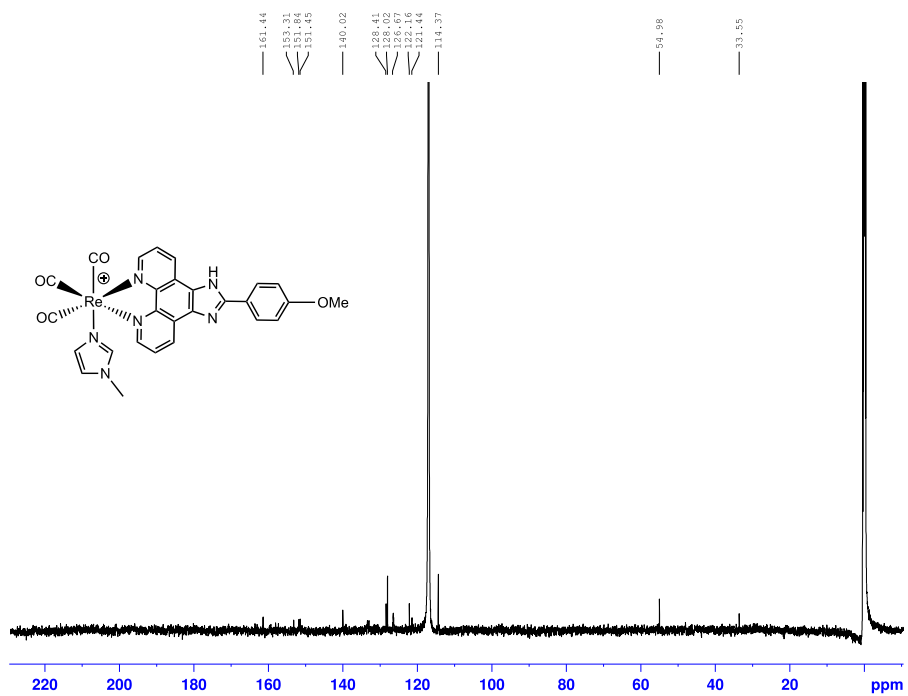

Figure S47.  $^{13}\text{C}$  NMR spectrum ( $\text{CD}_3\text{CN}$ , 150 MHz) of **5c**.

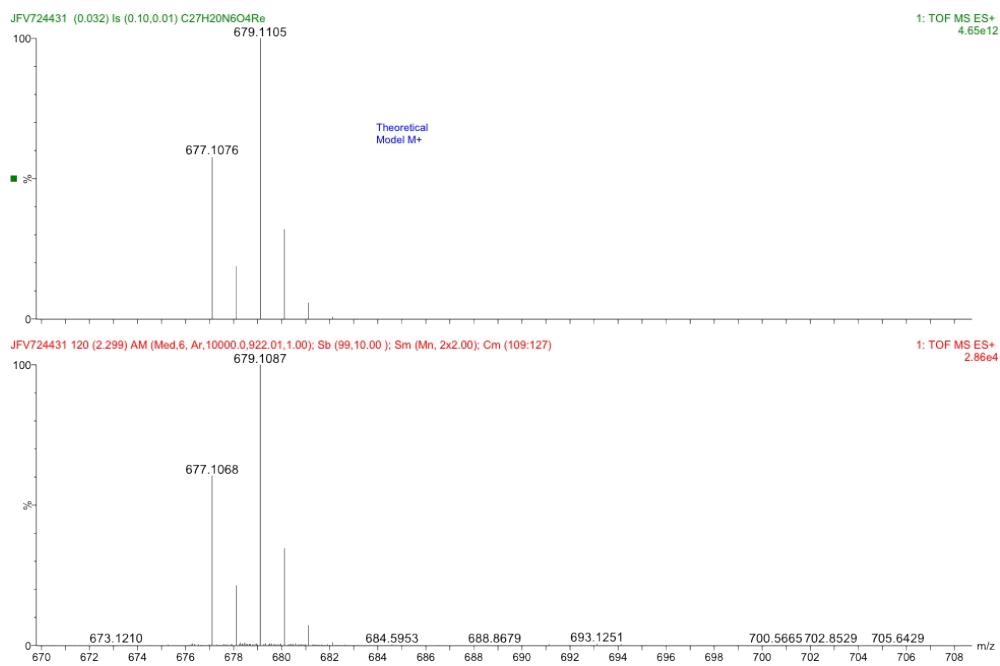

Figure S48. HRMS of **5c**.

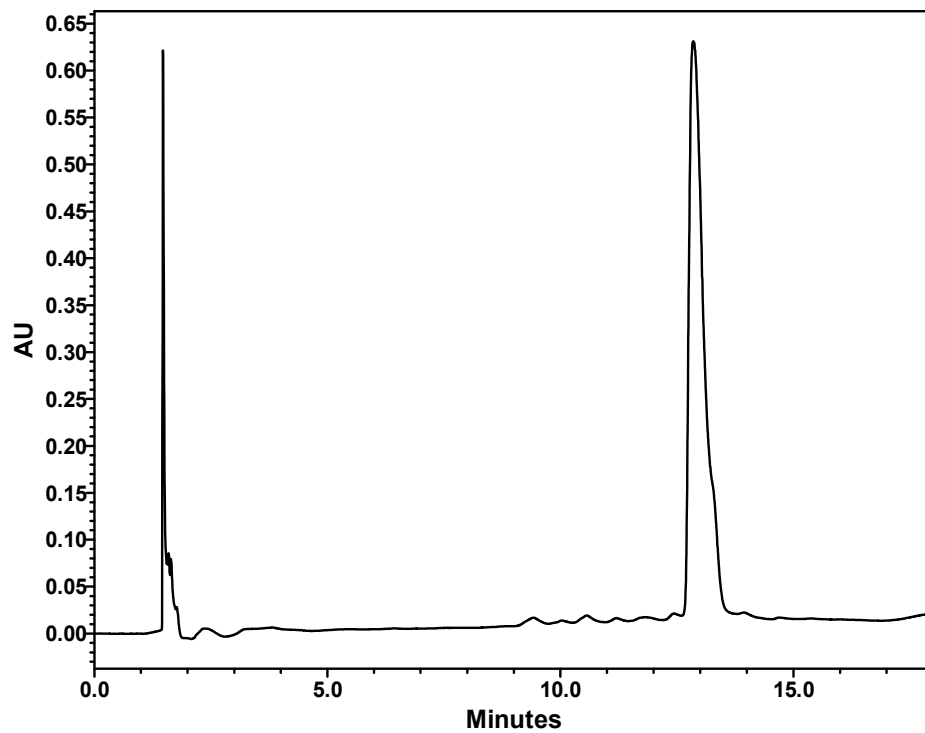

Figure S49. UV-HPLC trace of **5e** (Method D).

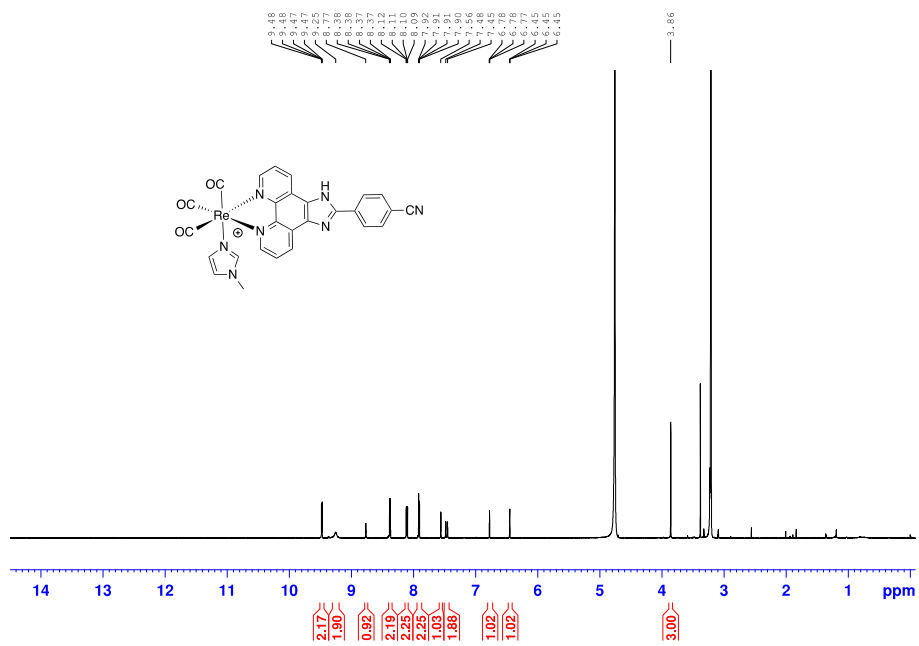

Figure S50.  $^1\text{H}$  NMR spectrum ( $\text{CD}_3\text{OD}$ ), 600 MHz) of **5e**.

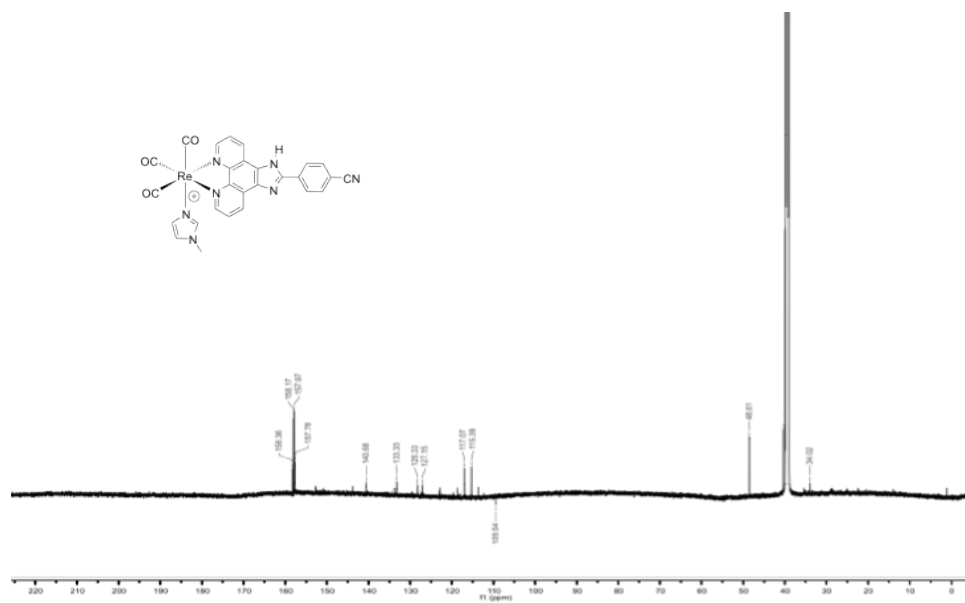

Figure S51.  $^{13}\text{C}$  NMR Spectrum ( $\text{CD}_3\text{OD}$ ), 150 MHz) of **5e**.

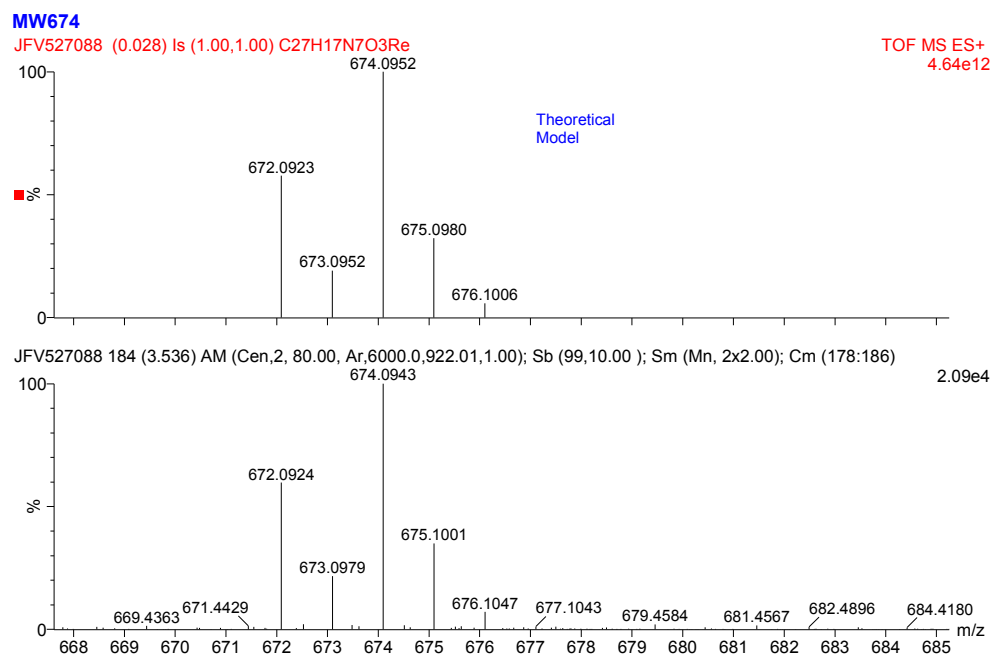

Figure S52. HRMS of **5e**.

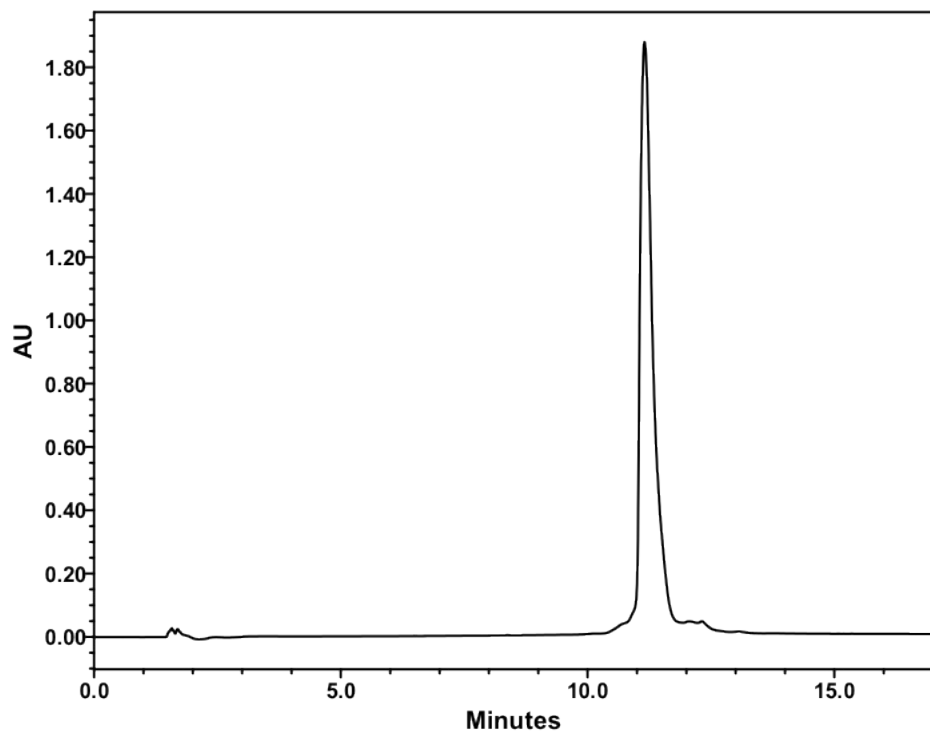

Figure S53. UV-HPLC trace of **5f** (Method D).

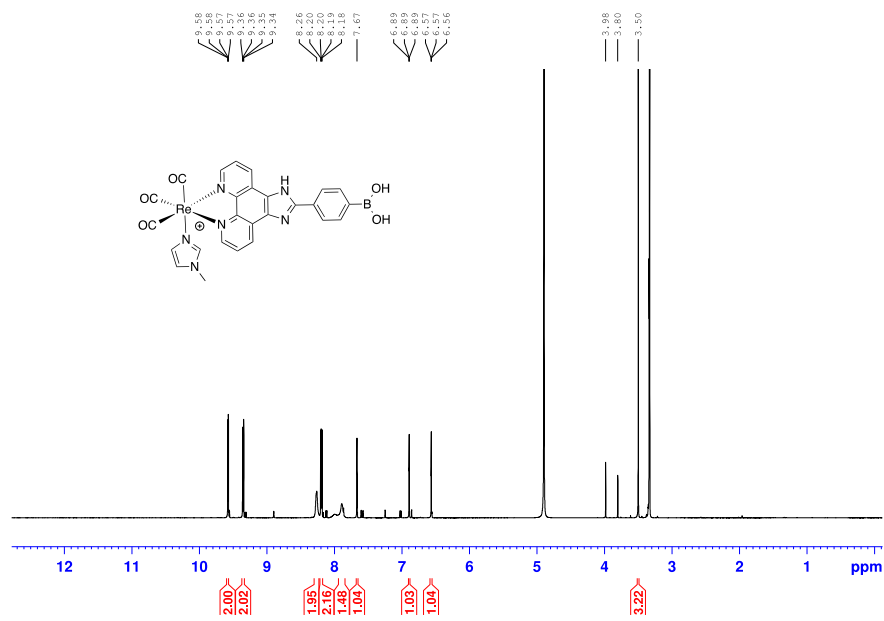

Figure S54. <sup>1</sup>H NMR spectrum (CD<sub>3</sub>OD, 600 MHz) of **5f**.

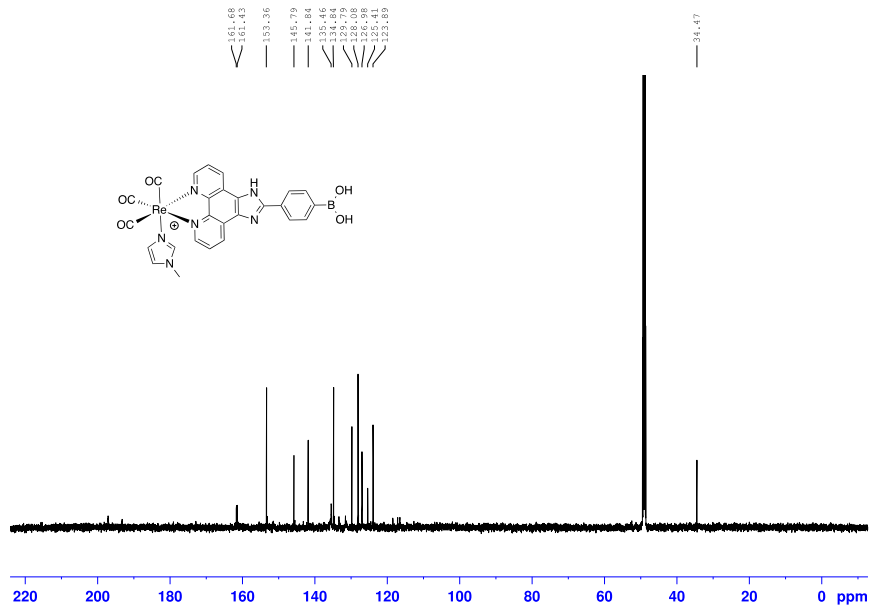

Figure S55.  $^{13}\text{C}$  NMR spectrum ( $\text{CD}_3\text{OD}$ , 150 MHz) of **5f**.

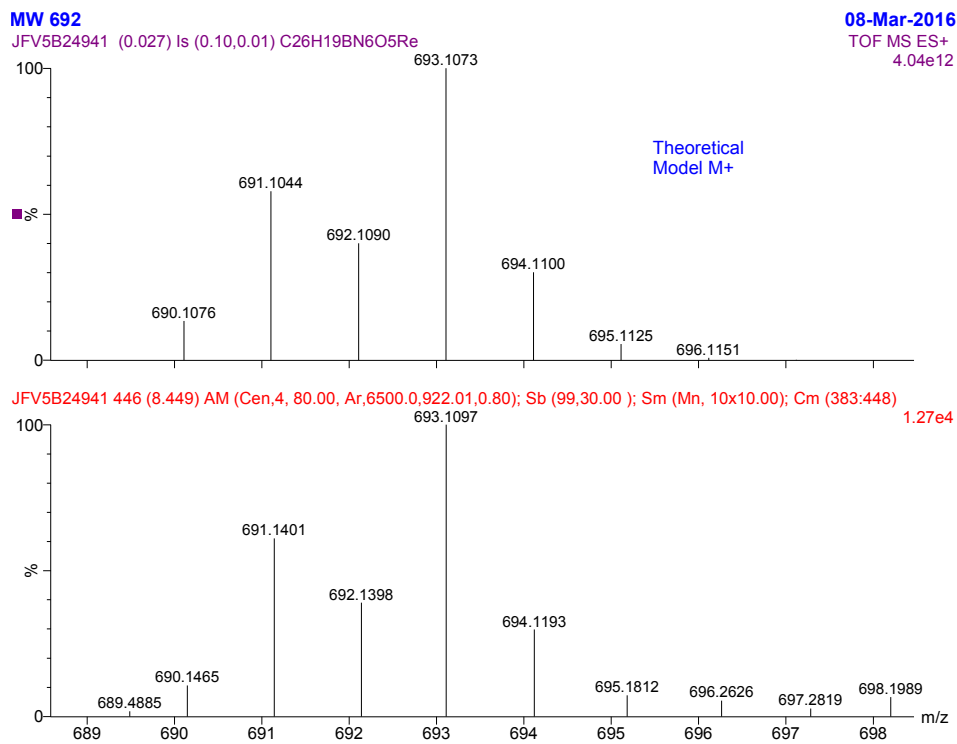

Figure S56. HRMS of **5f**.



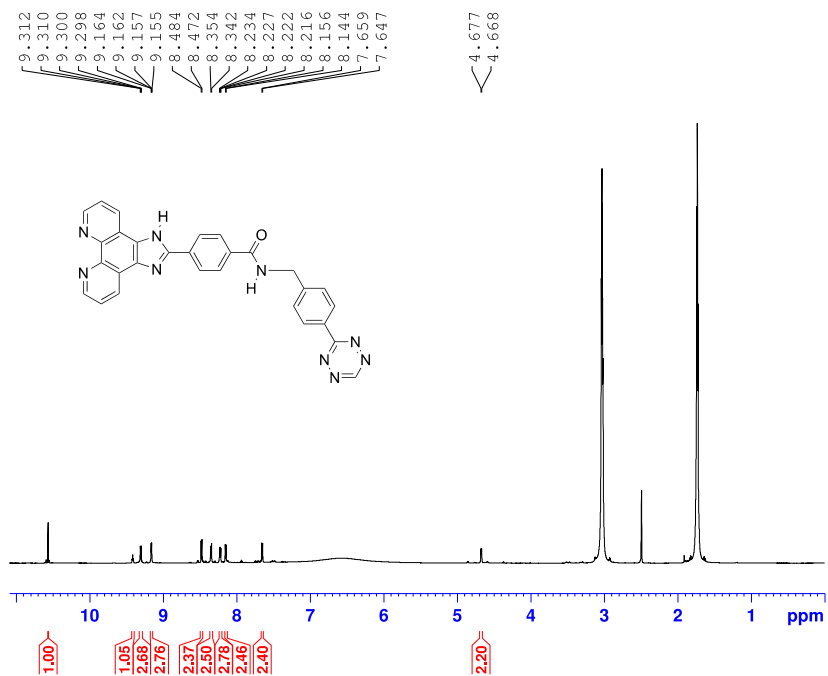

Figure S57. <sup>1</sup>H NMR spectrum ((CD<sub>3</sub>)<sub>2</sub>SO), 600 MHz) of **9**.

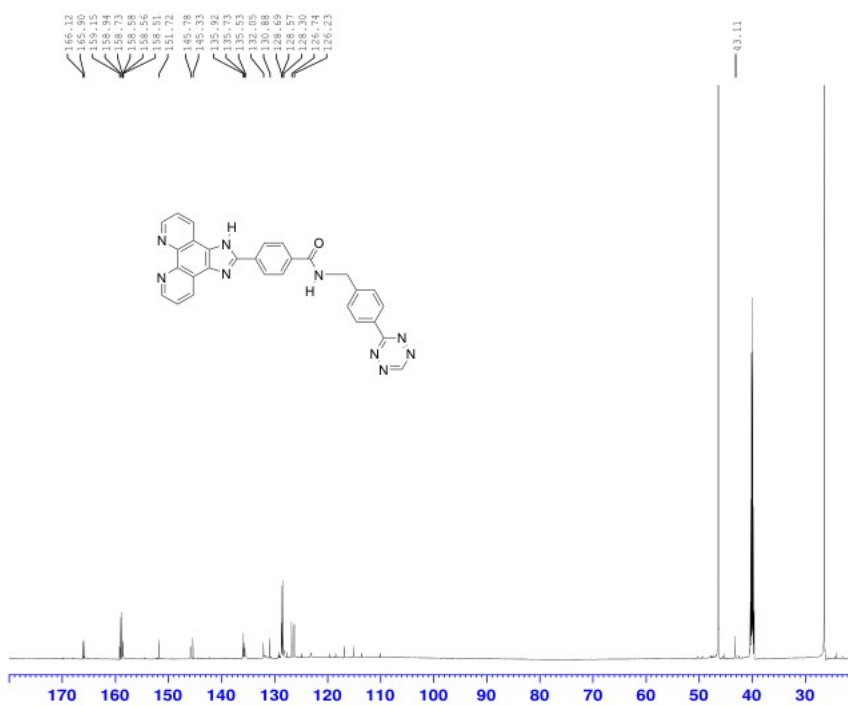

Figure S58. <sup>13</sup>C NMR spectrum ((CD<sub>3</sub>)<sub>2</sub>SO), 150 MHz) of **9**.

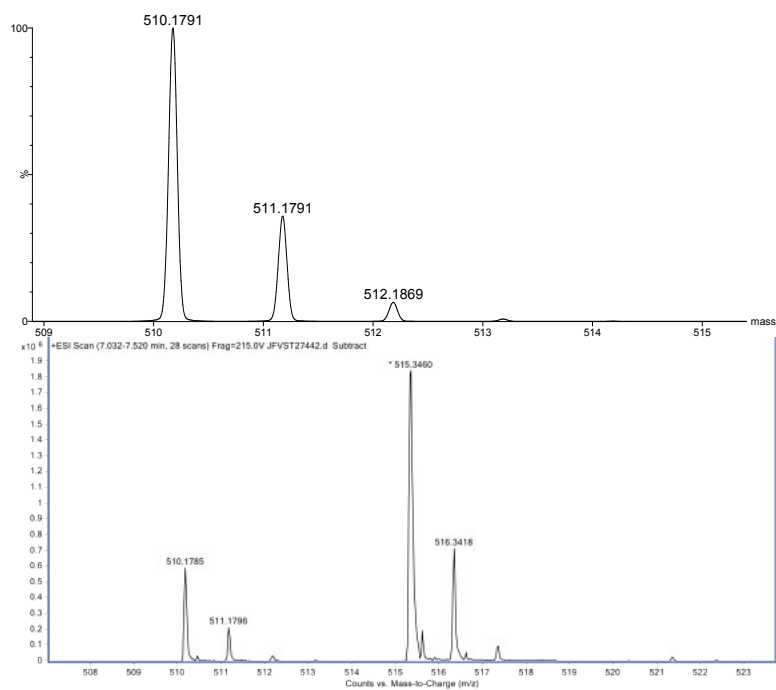

Figure S59. HRMS of **9**.

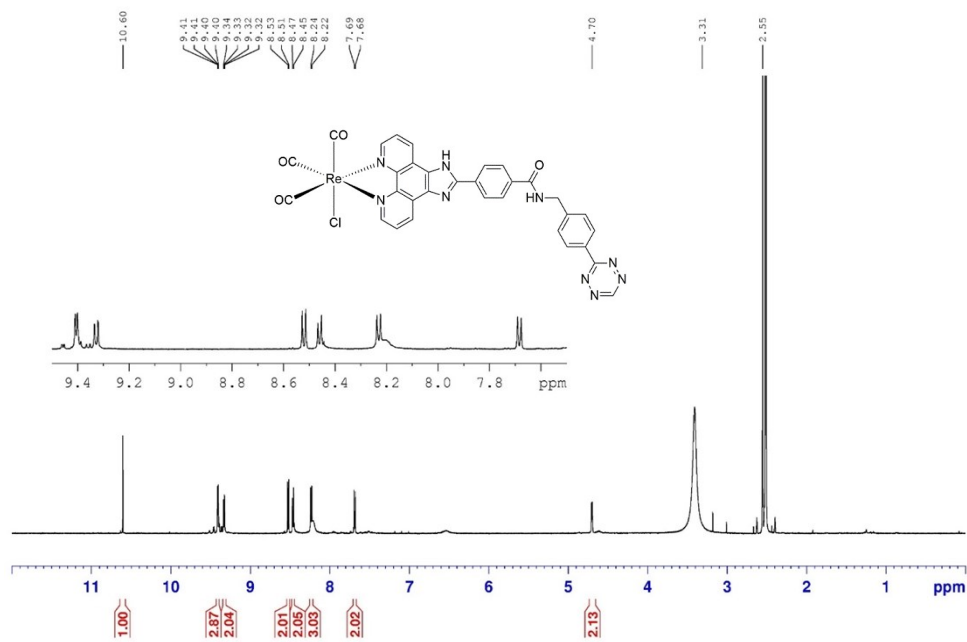

Figure S60.  $^1\text{H}$  NMR spectrum ( $(\text{CD}_3)_2\text{SO}$ , 600 MHz) of **10**.

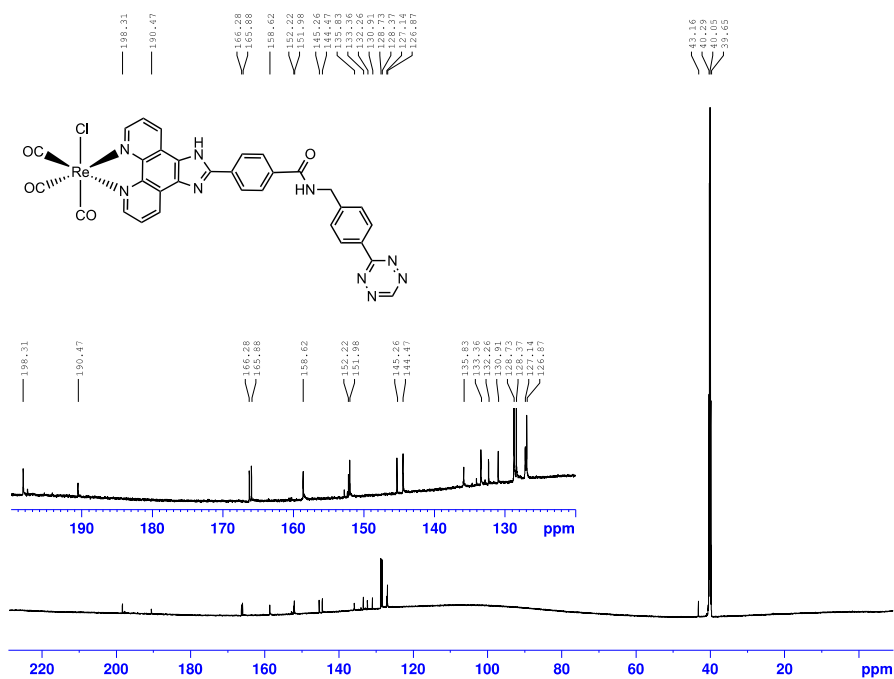

Figure S61.  $^{13}\text{C}$  NMR spectrum ( $(\text{CD}_3)_2\text{SO}$ , 150 MHz) of **10**.

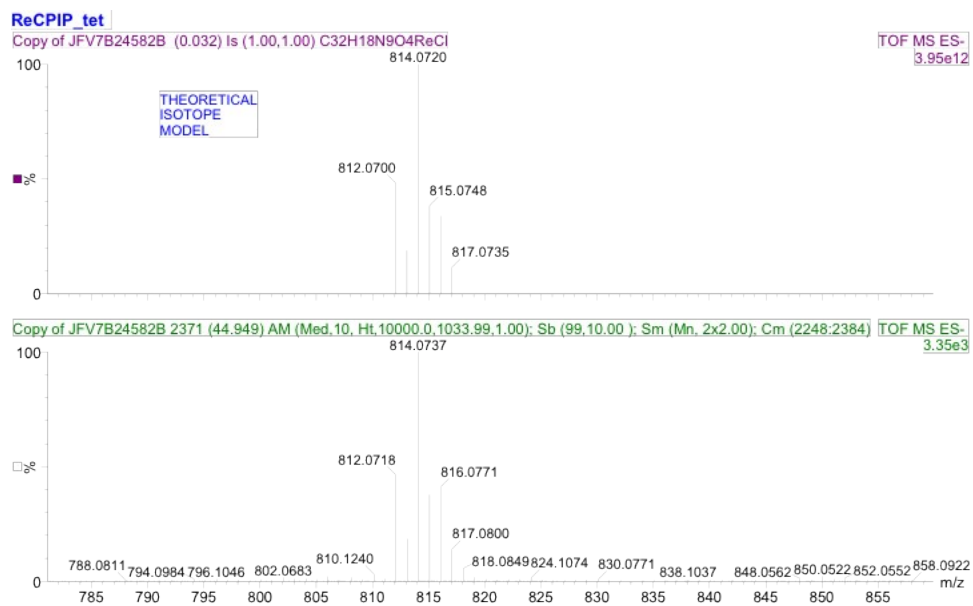

Figure S62. HRMS of **10**.

A saturated solution of sinapinic acid was prepared in TA30 solvent (30:70 [v/v] acetonitrile : 0.1% TFA in water). The samples were mixed in a 1:1 ratio with the matrix solution. 1  $\mu$ L was spotted on the plate and a protein solution of BSA was used as an external standard.

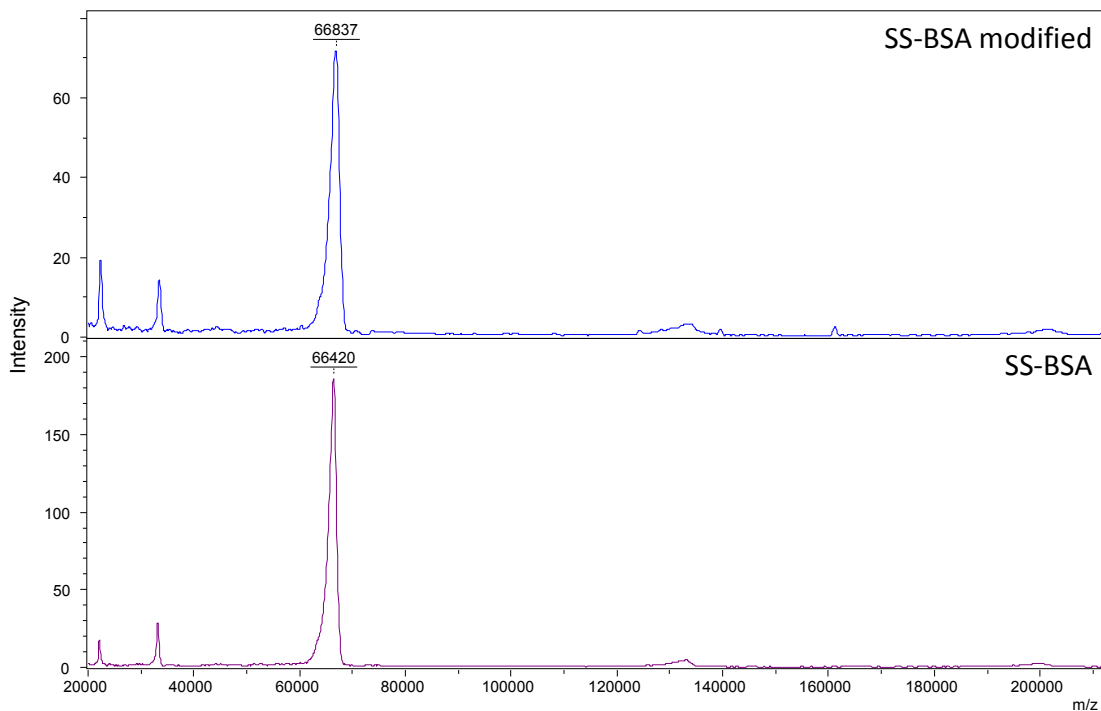

Figure S63. MALDI-TOF MS analysis of BSA samples top: **14** and bottom BSA.

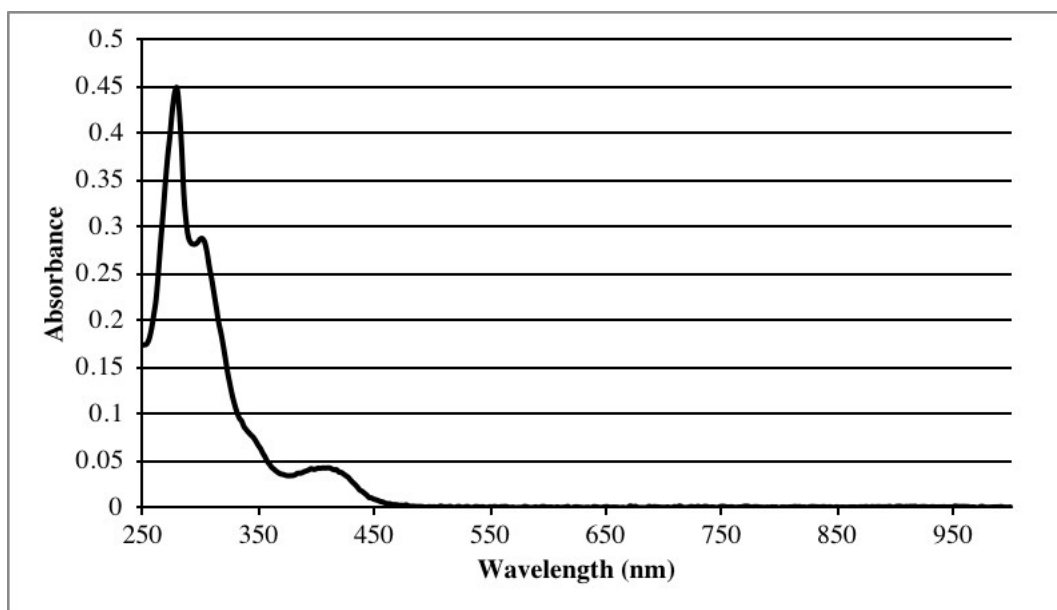

Figure S64. Absorbance spectrum of **4a** (278 nm, 0.44 a.u.; 304 nm, 0.28 a.u.; 406 nm, 0.39 a.u.)

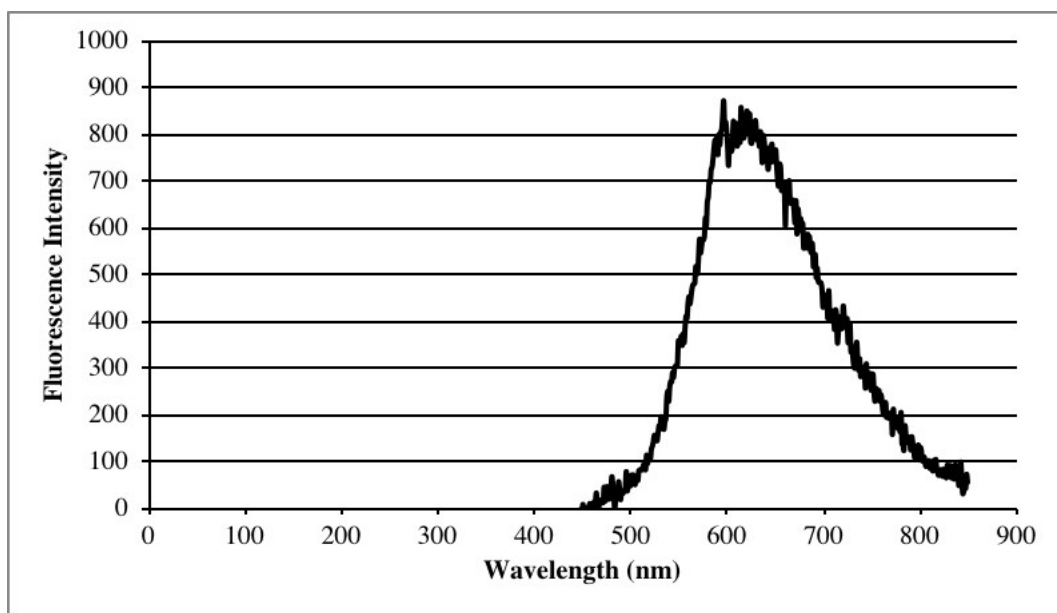

Figure S65. Emission spectrum of **4a** ( $\lambda_{\text{ex}}$  = 460 nm; 612 nm, 782 a.u.)

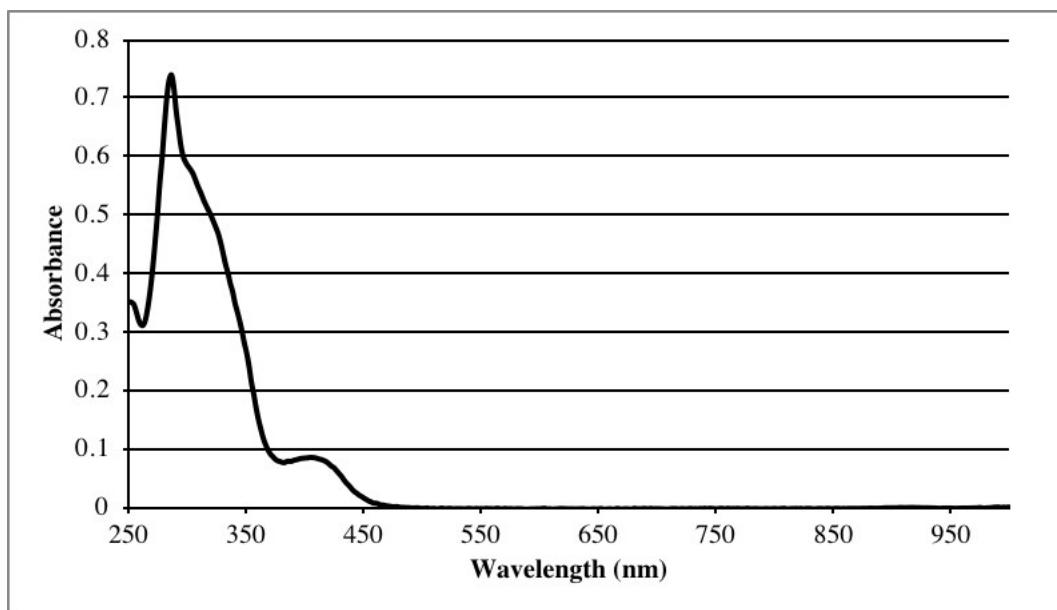

Figure S66. Absorbance spectrum of **4b** (284 nm, 0.73 a.u.; 302 nm, 0.58 a.u.; 404 nm, 0.087 a.u.)

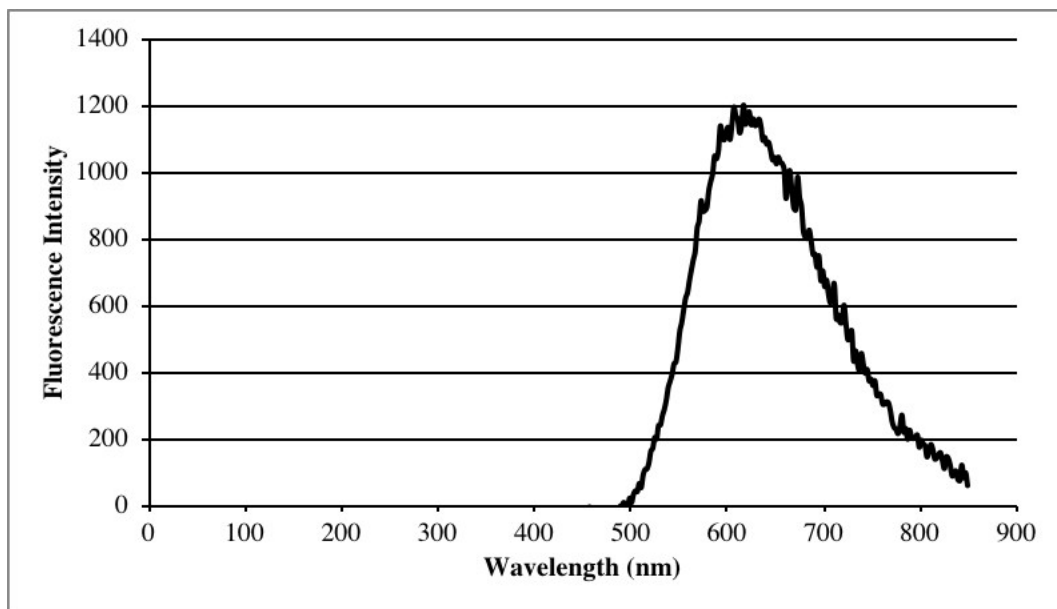

Figure S67. Emission spectrum of **4b** ( $\lambda_{\text{ex}}$  = 406 nm; 596 nm, 1166 a.u.)

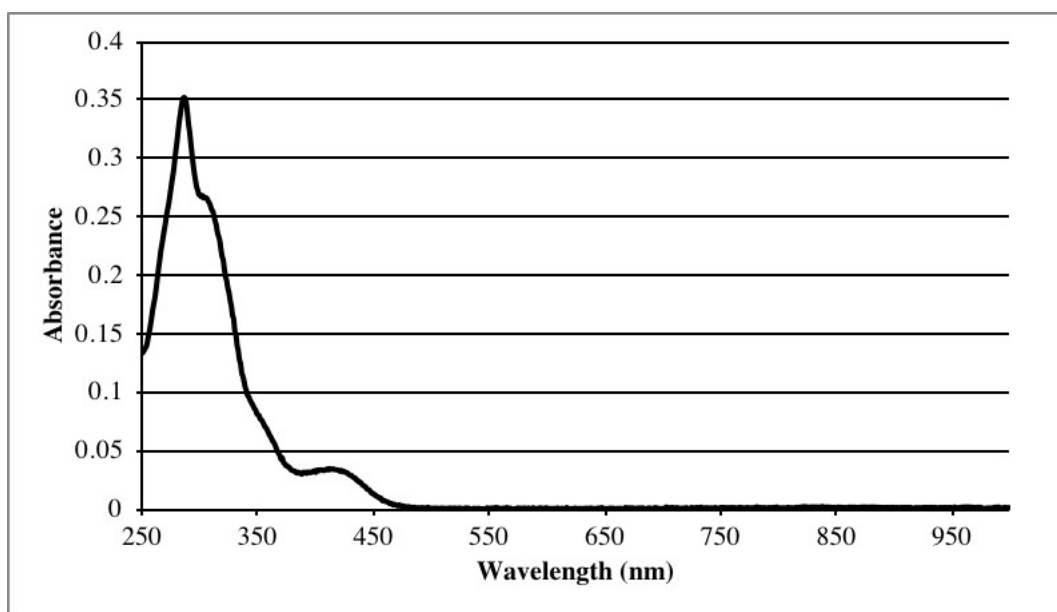

Figure S68. Absorbance spectrum of **4c** (283 nm, 0.34 a.u.; 303 nm, 0.27 a.u.; 412 nm, 0.034 a.u.).

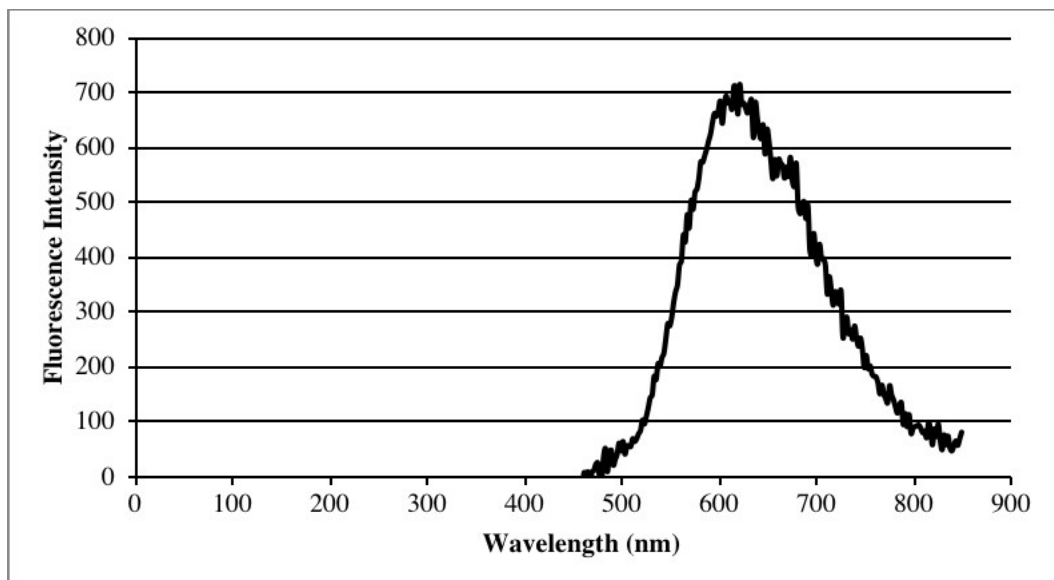

Figure S69. Emission spectrum of **4c** ( $\lambda_{\text{ex}}$  = 410 nm; 616 nm, 713 a.u.).

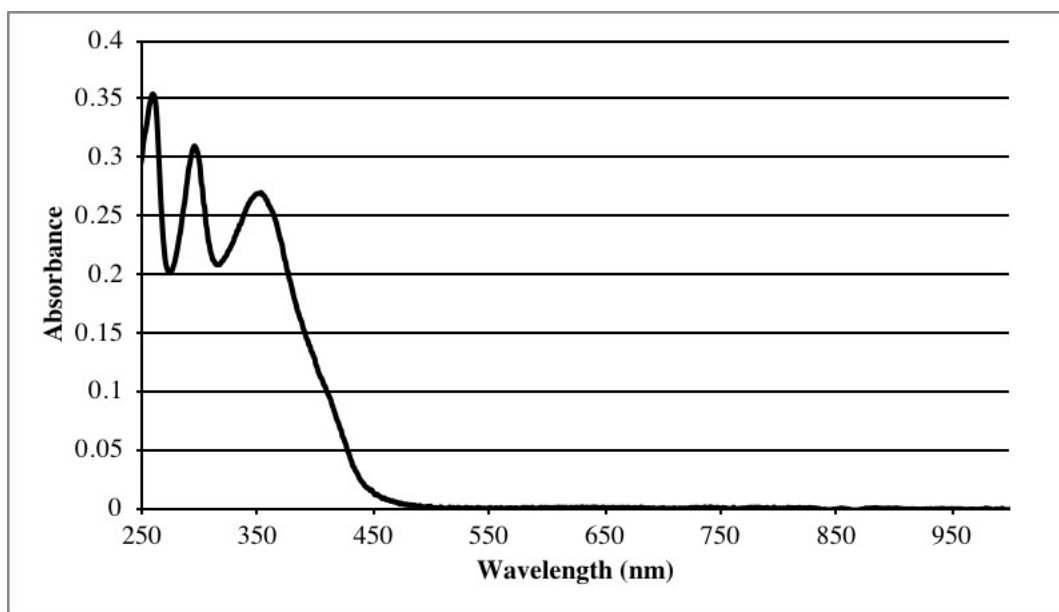

Figure S70. Absorbance spectrum of **4d** (259 nm, 0.35 a.u.; 293 nm, 0.304 a.u.; 344 nm, 0.26 a.u.; 351 nm, 0.094 a.u.).

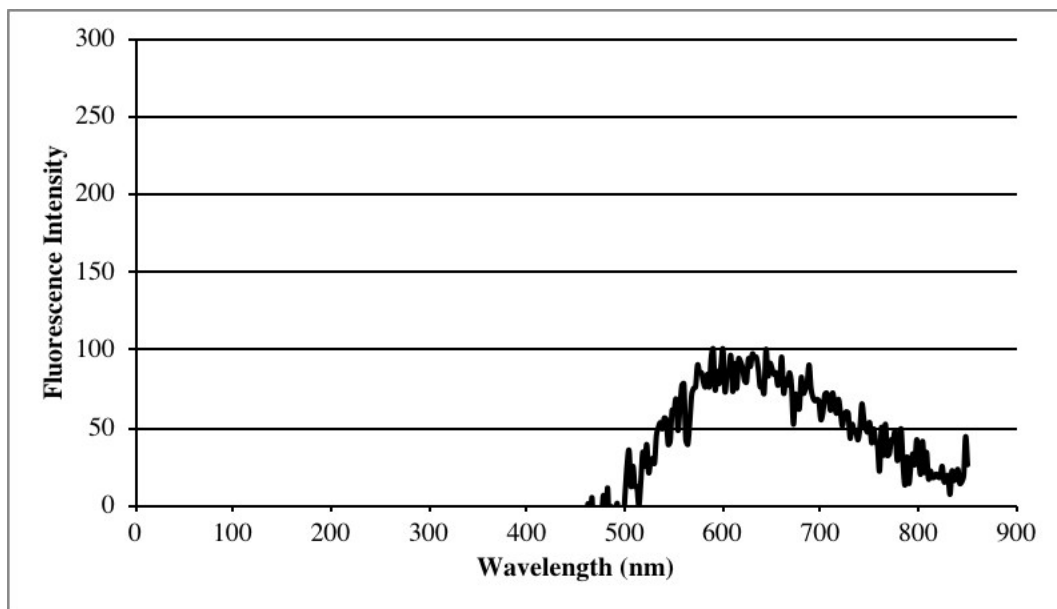

Figure S71. Emission spectrum of **4d** ( $\lambda_{\text{ex}}$  = 351 nm; 649 nm, 69 a.u.).

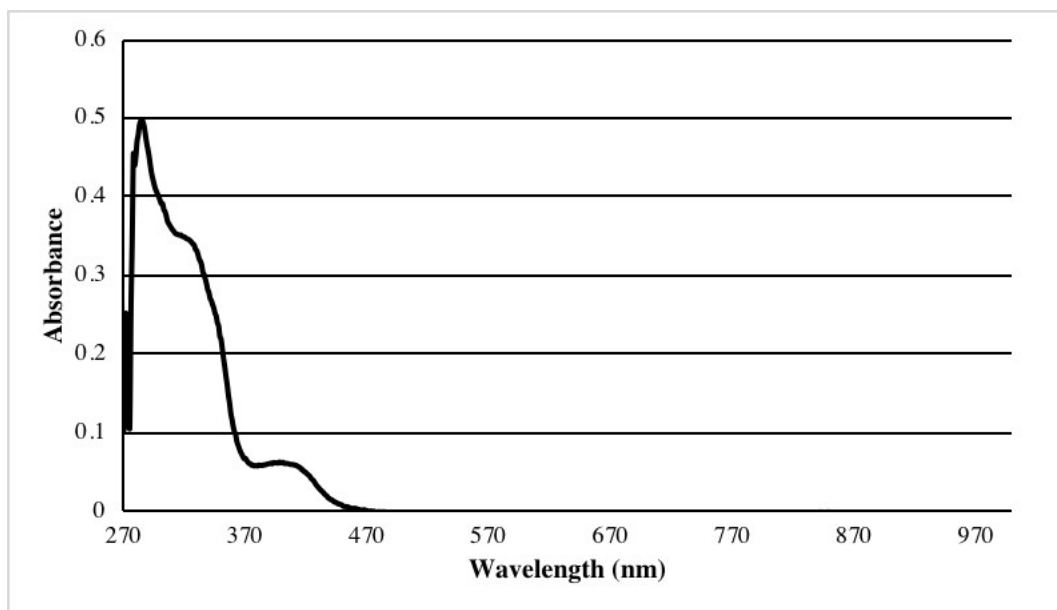

Figure S72. Absorbance spectrum of **4e** (286 nm, 0.497 a.u.; 324 nm, 0.35 a.u.; 399 nm, 0.061 a.u.).



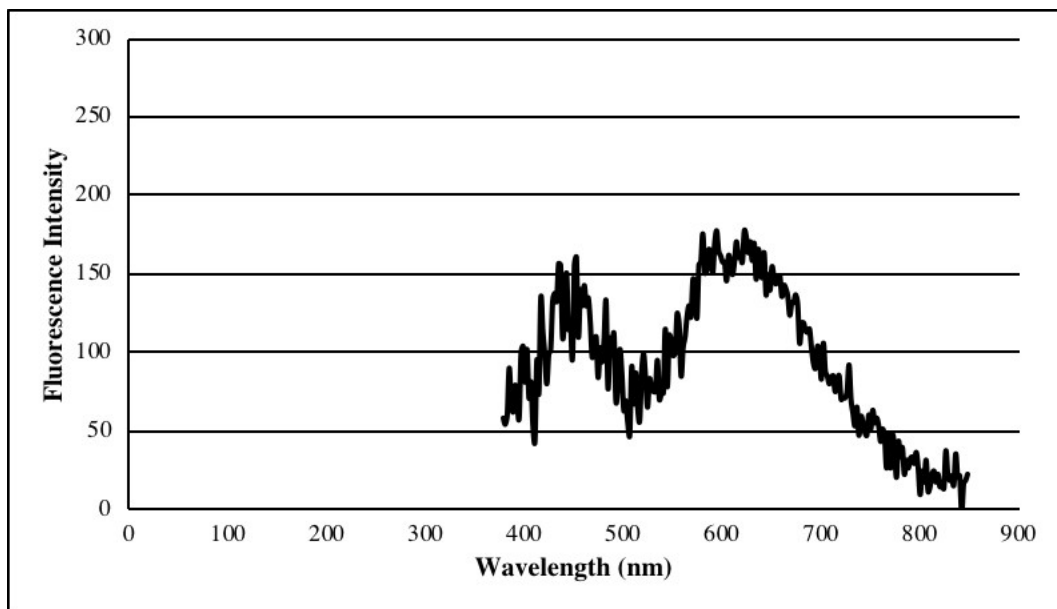

Figure S73. Emission spectrum of **4e** ( $\lambda_{\text{ex}}$  = 365 nm; 451 nm, 156 a.u.; 611 nm, 150 a.u.).

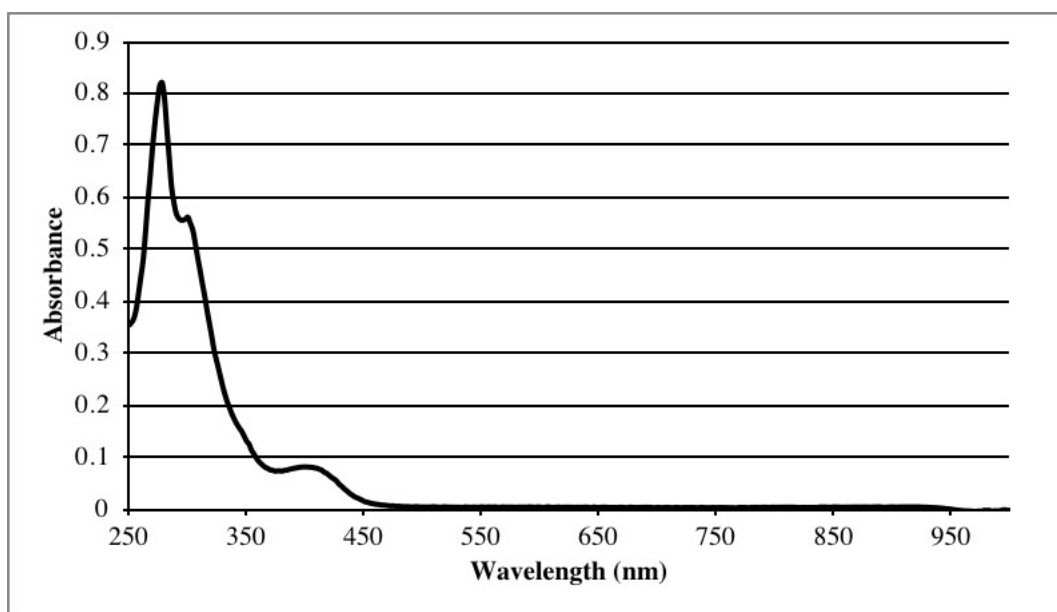

Figure S74. Absorbance spectrum of **5a** (276 nm, 0.81 a.u.; 302 nm, 0.55 a.u.; 400 nm, 0.08 a.u.).

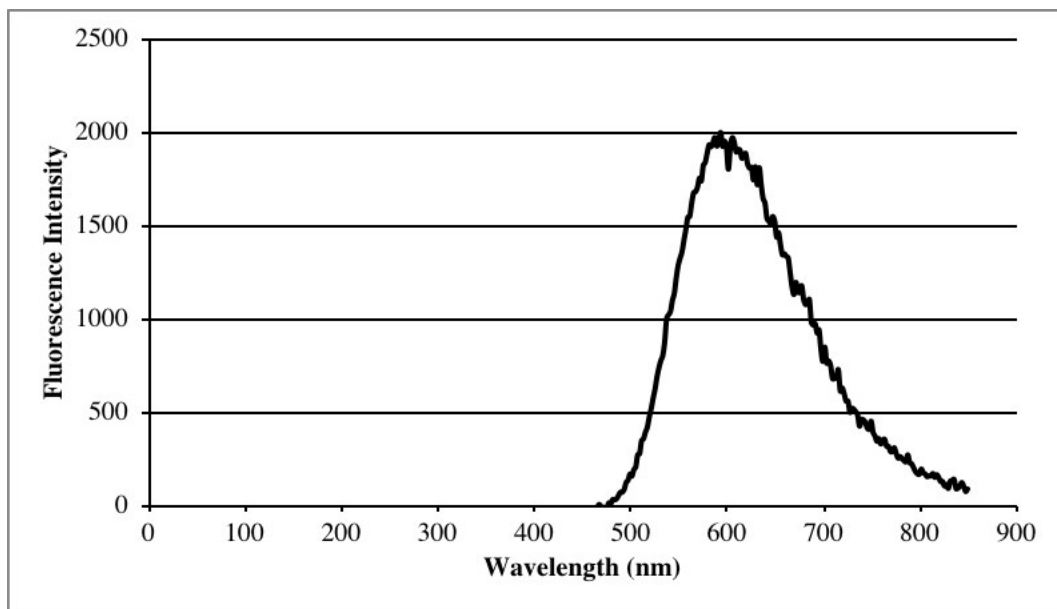

Figure S75. Emission spectrum of **5a** ( $\lambda_{\text{ex}} = 400 \text{ nm}$ ; 594 nm, 1916 a.u.).

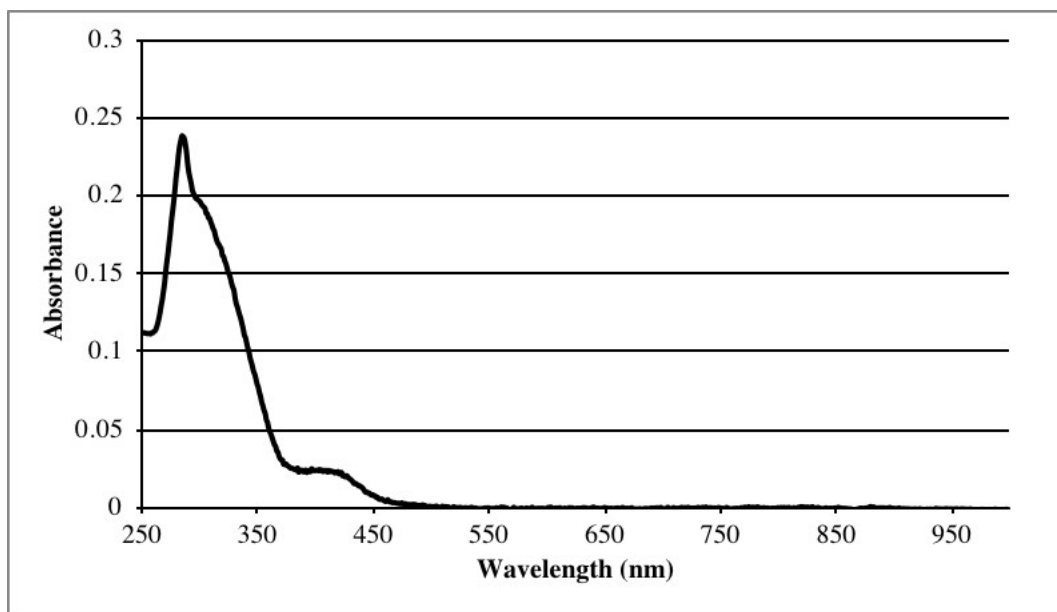

Figure S76. Absorbance spectrum of **5b** (282 nm, 0.23 a.u.; 302 nm, 0.19 a.u.; 407 nm, 0.024 a.u.).

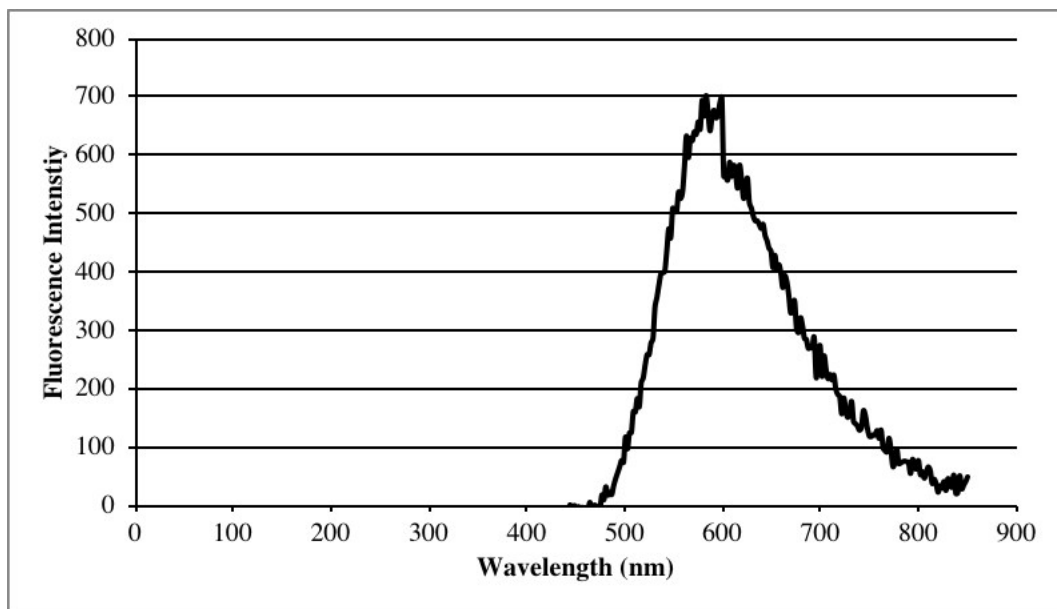

Figure S77. Emission spectrum of **5b** ( $\lambda_{\text{ex}}$  = 407 nm; 595 nm, 667 a.u.).

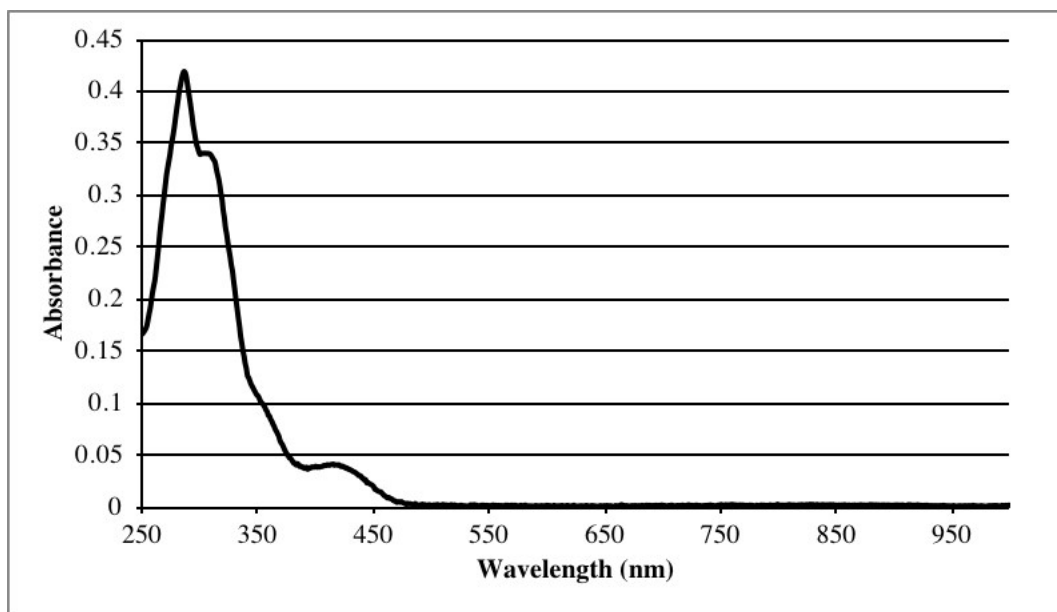

Figure S78. Absorbance spectrum of **5c** (283 nm, 0.40 a.u.; 299 nm, 0.34 a.u.; 414 nm, 0.039 a.u.).

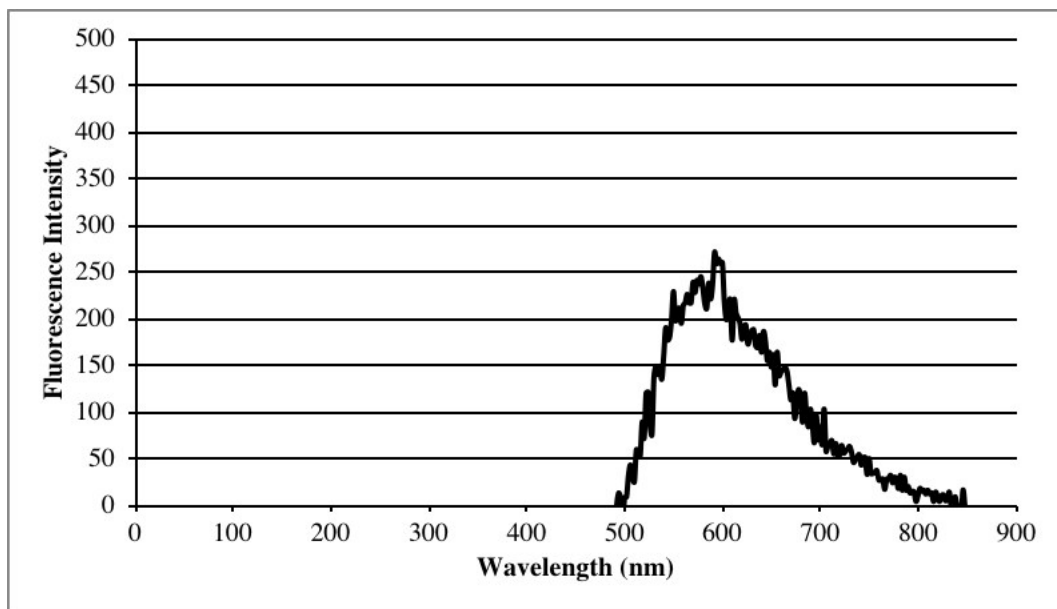

Figure S79. Emission spectrum of **5c** ( $\lambda_{\text{ex}} = 422 \text{ nm}$ ; 574 nm, 213 a.u.).

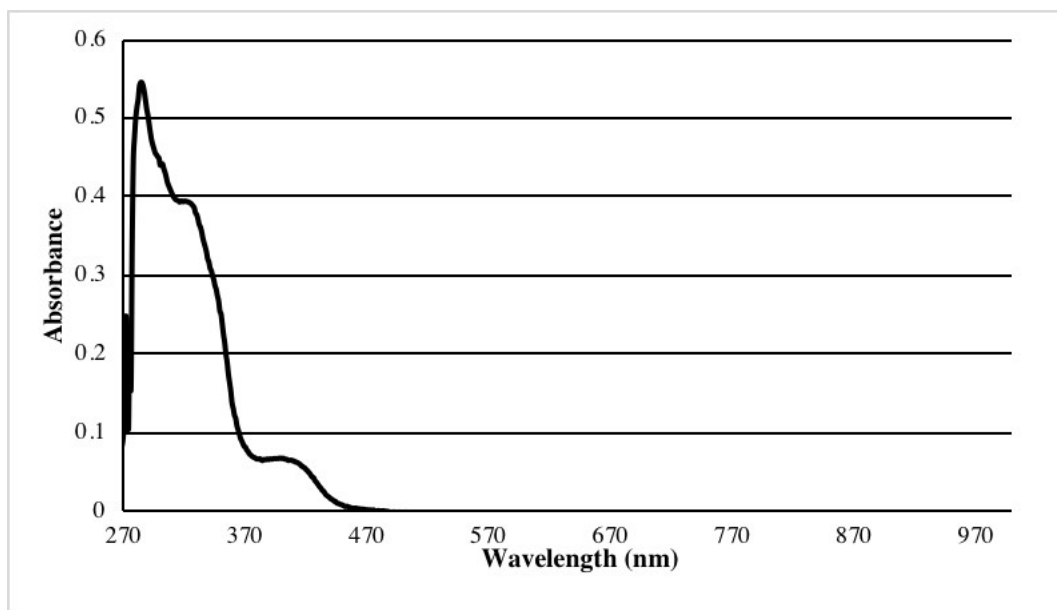

Figure S80. Absorbance spectrum of **5e** (284 nm, 0.54 a.u.; 314 nm, 0.40 a.u.; 399 nm, 0.068 a.u.).

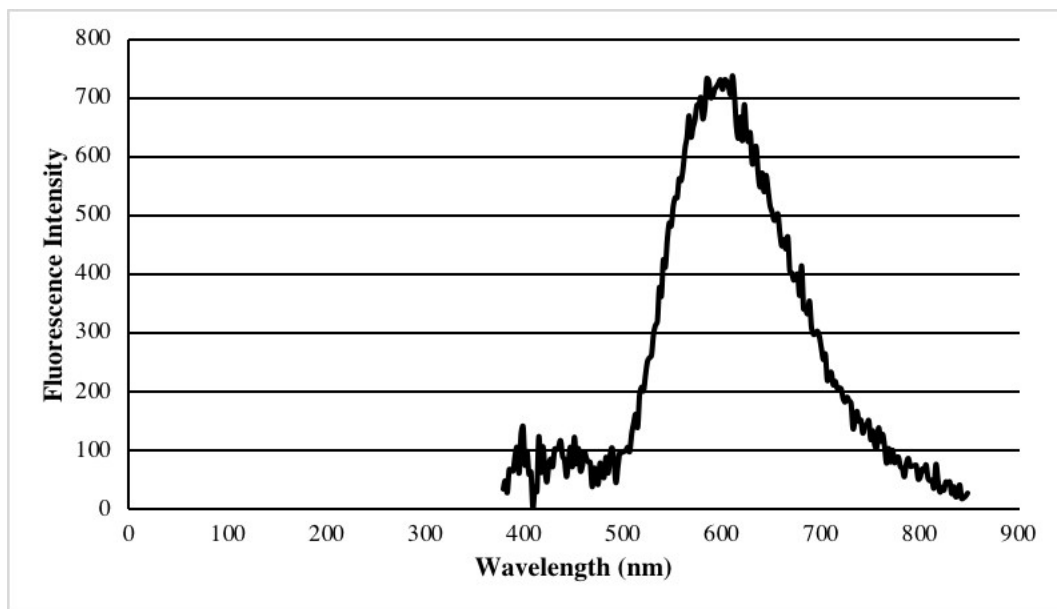

Figure S81. Emission spectrum of **5e** ( $\lambda_{\text{ex}} = 365 \text{ nm}; 611 \text{ nm}, 735 \text{ a.u.}$ ).

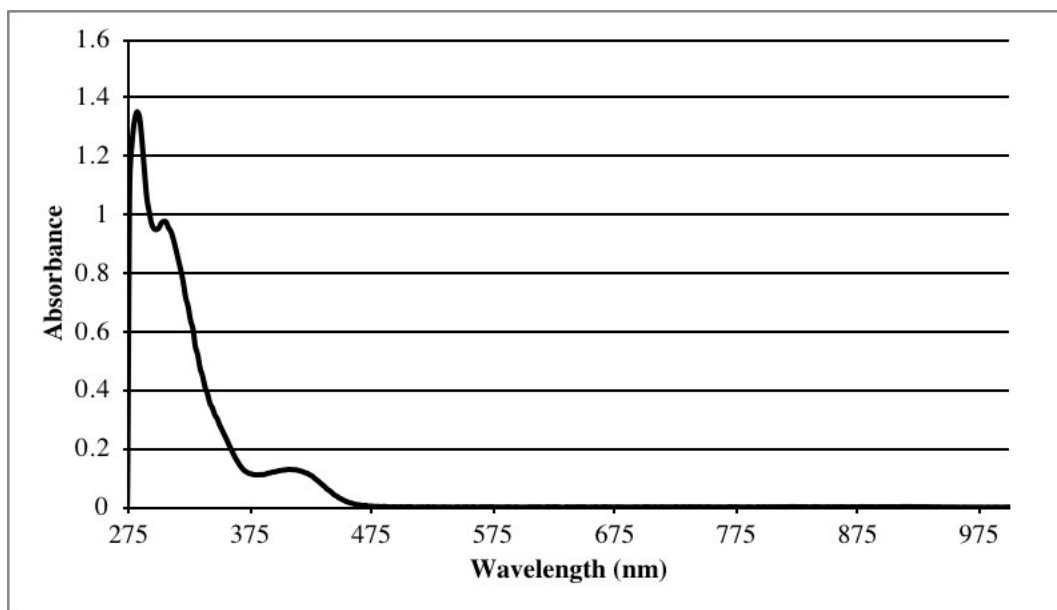

Figure S82. Absorbance spectrum of **5f** (282 nm, 1.35 a.u.; 306 nm, 0.97 a.u.; 406 nm, 0.128 a.u.).

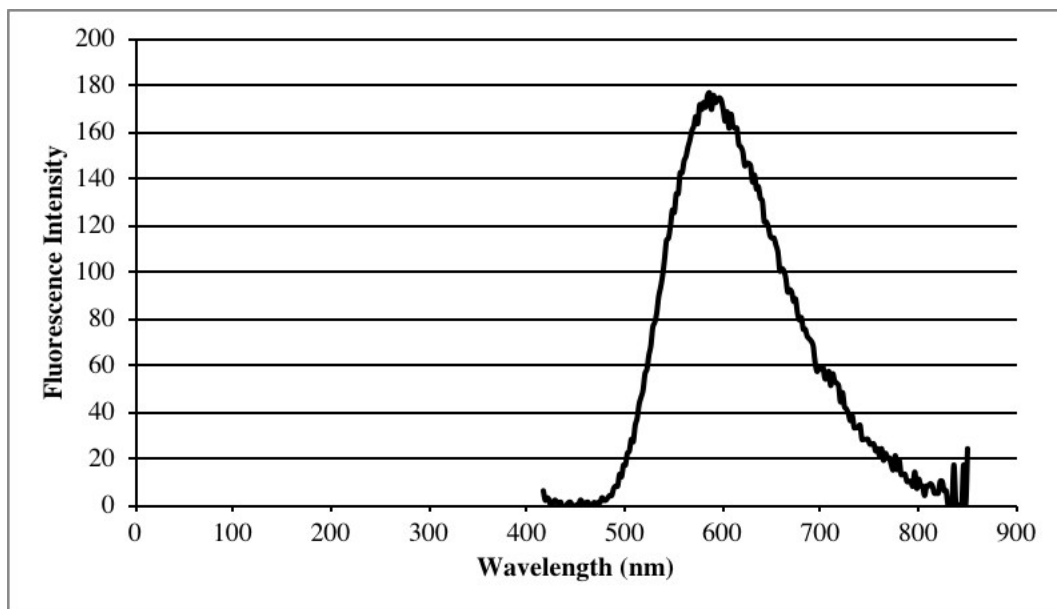

Figure S83. Emission spectrum of **5f** ( $\lambda_{\text{ex}} = 406 \text{ nm}$ ; 586 nm, 176 a.u.).

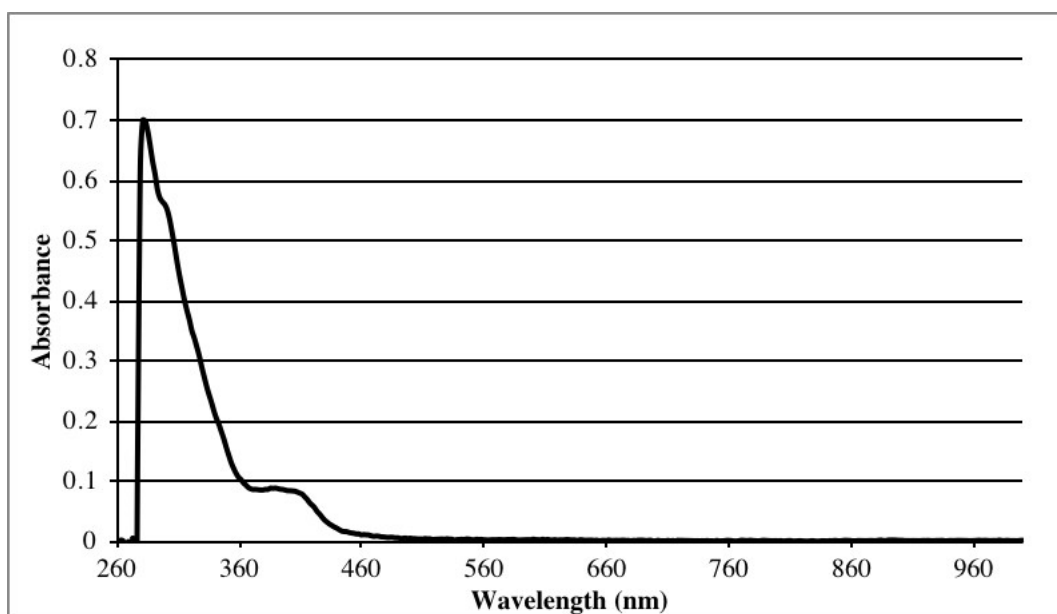

Figure S84. Absorbance spectrum of **9a** (282 nm, 0.70 a.u.; 300 nm, 0.56 a.u.; 402 nm, 0.084 a.u.).

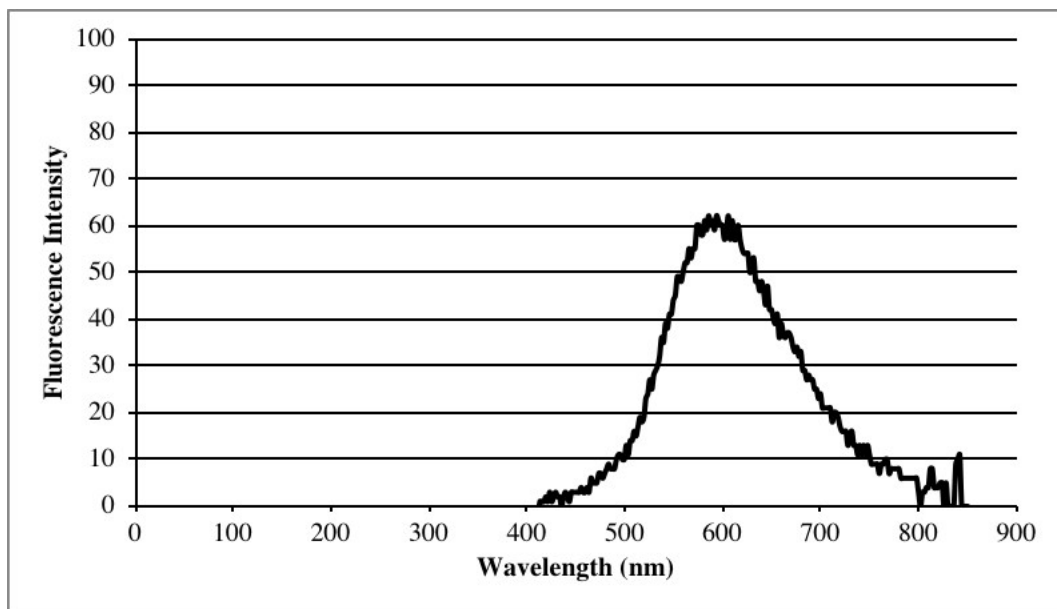

Figure S85. Emission spectrum of **9a** ( $\lambda_{\text{ex}} = 402 \text{ nm}$ ; 594 nm, 62 a.u.).

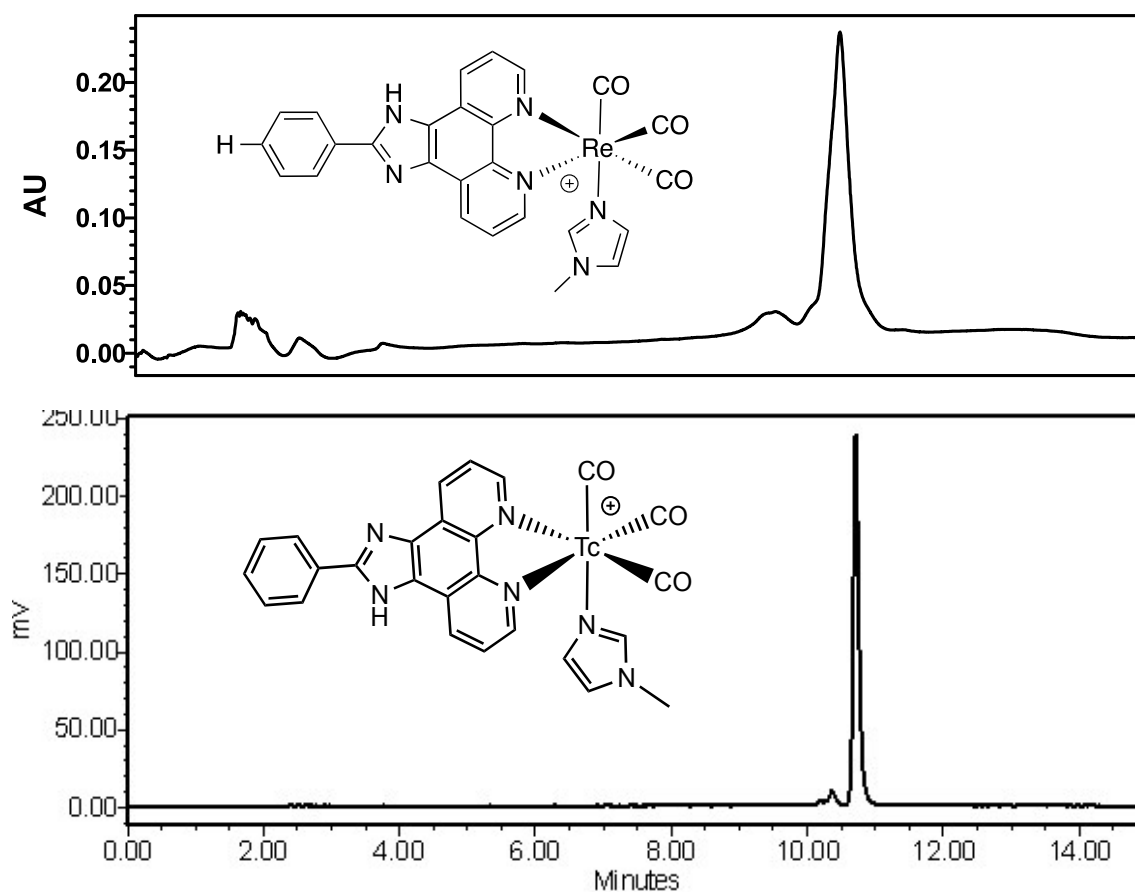

Figure S86. UV-HPLC trace of **5a** (top) and  $\gamma$ -HPLC trace of **7a** (bottom) (Method B).

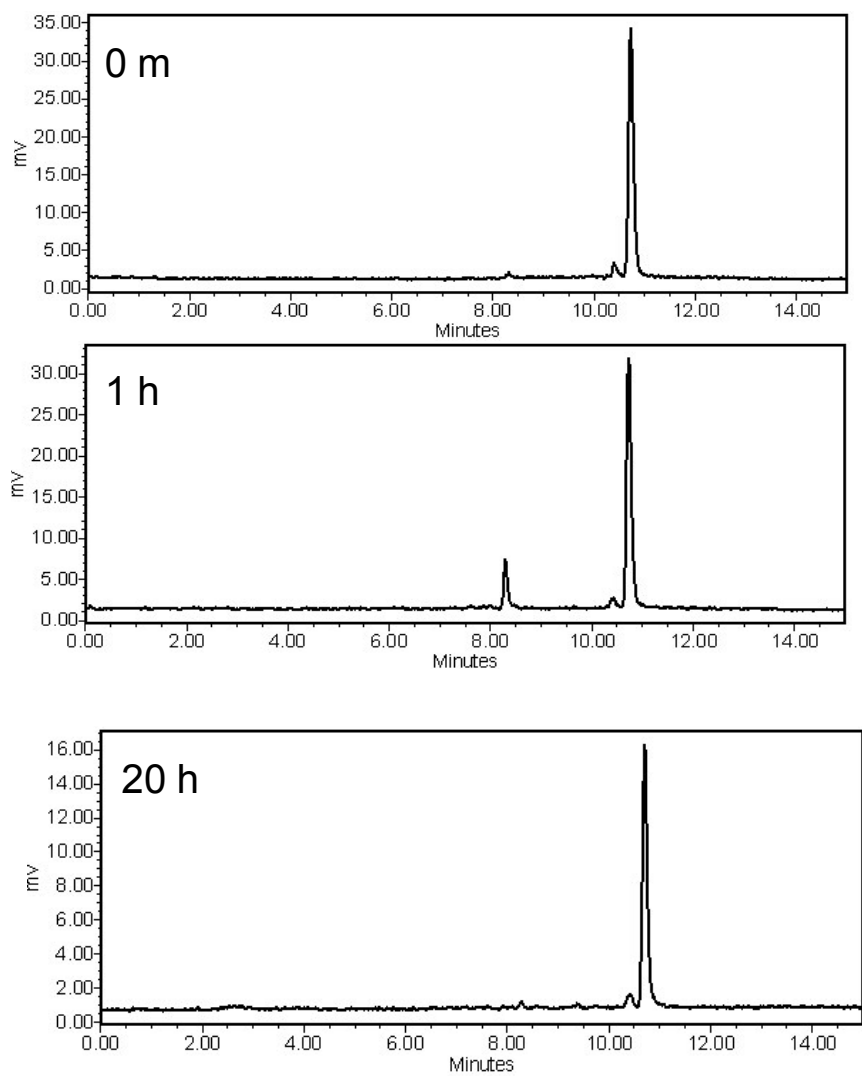

Figure S87.  $\gamma$ -HPLC trace of 7a after 1 and 20 h in saline (Method B).



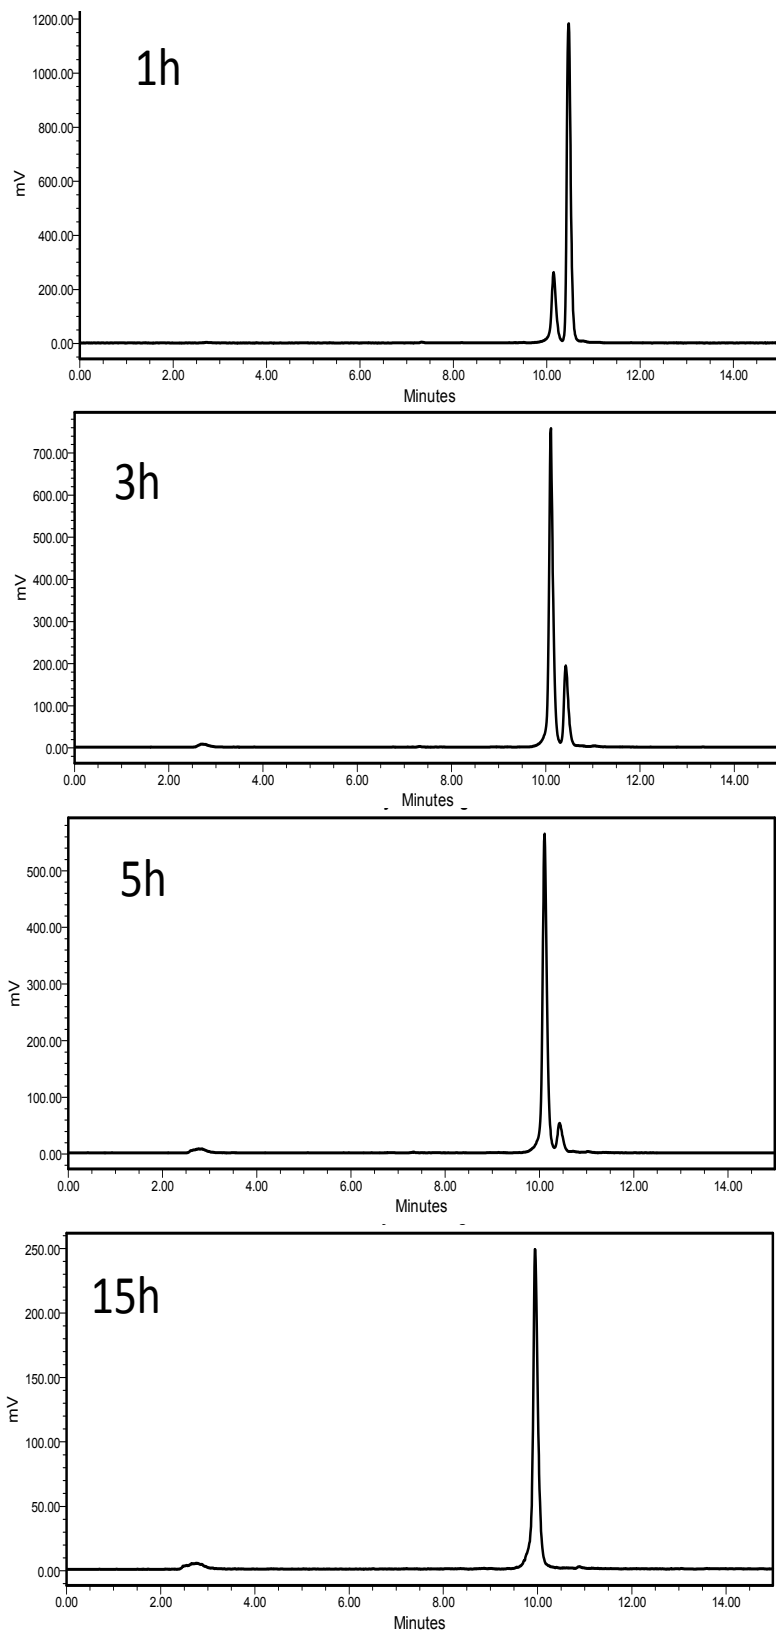

Figure S88.  $\gamma$ -HPLC trace of 7a with histidine challenge (Method B).

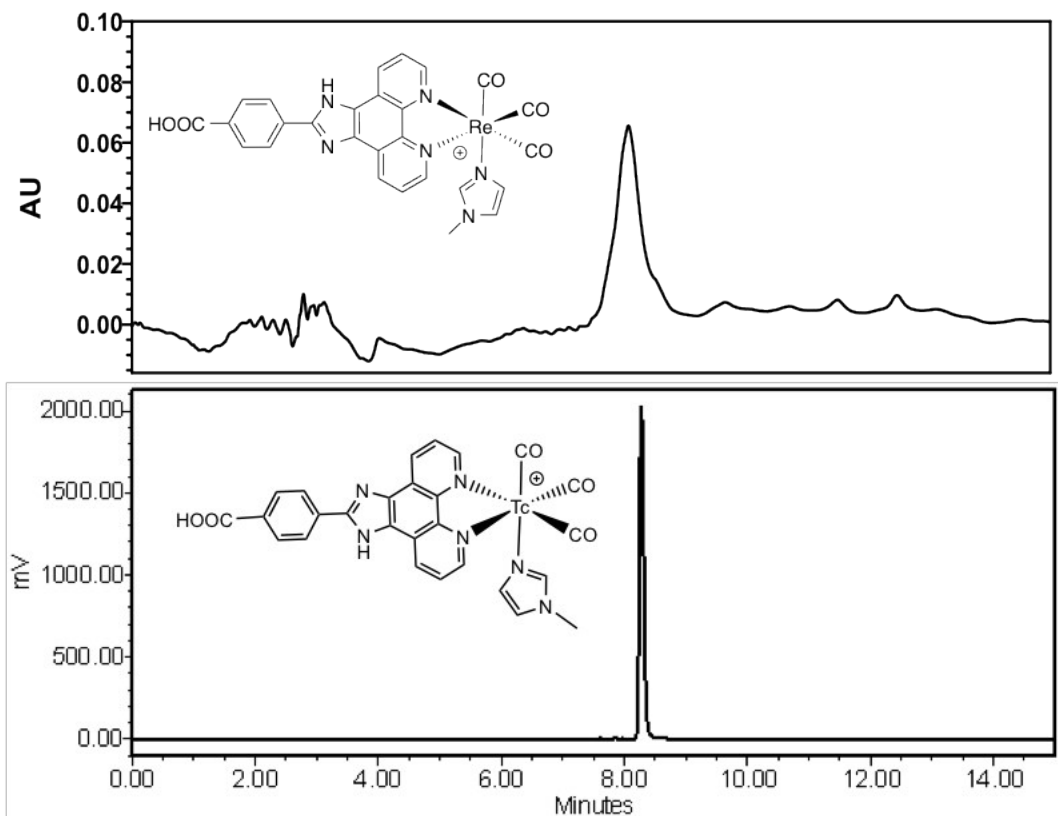

Figure S89. UV-HPLC trace of **5b** (top) and  $\gamma$ -HPLC trace of **7b** (bottom) (Method B).

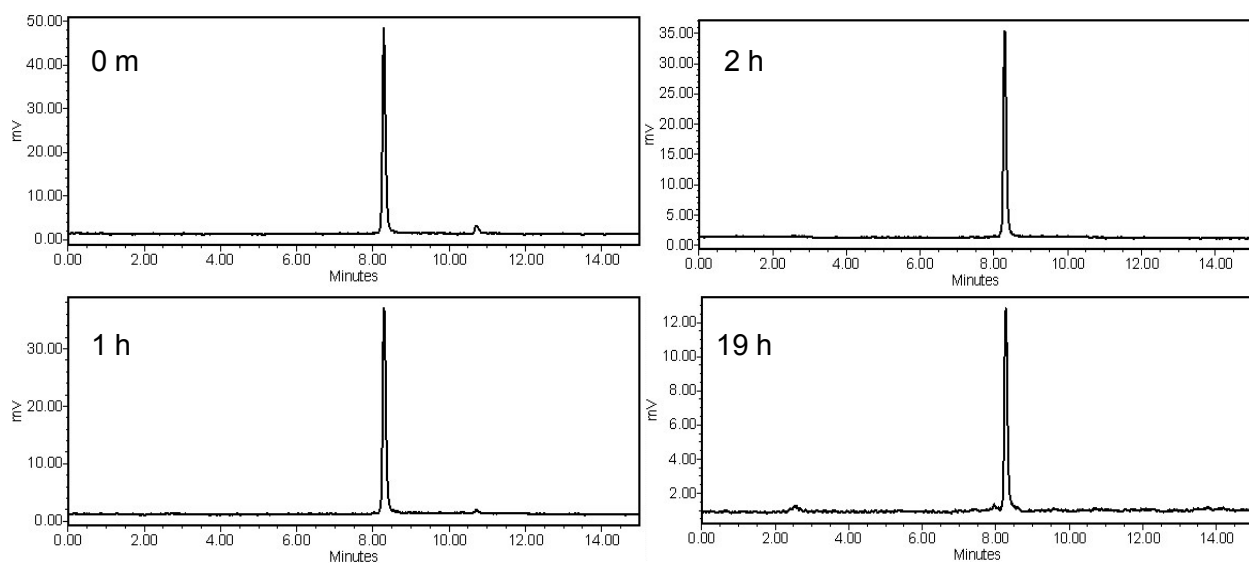

Figure S90.  $\gamma$ -HPLC trace of **7b** after 1, 2 and 19 h in saline (Method B).

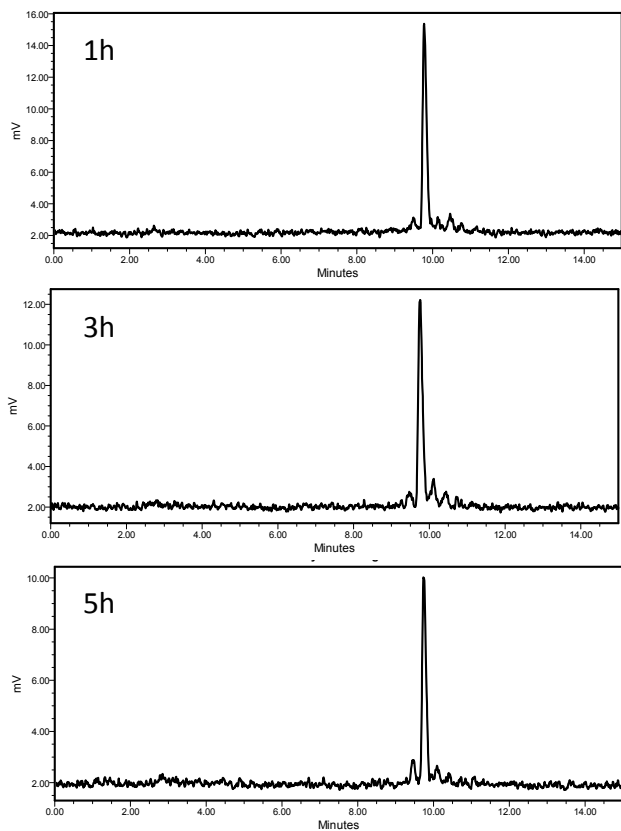

Figure S91.  $\gamma$ -HPLC trace of **7b** after 1, 3 and 5 h in histidine (Method B).

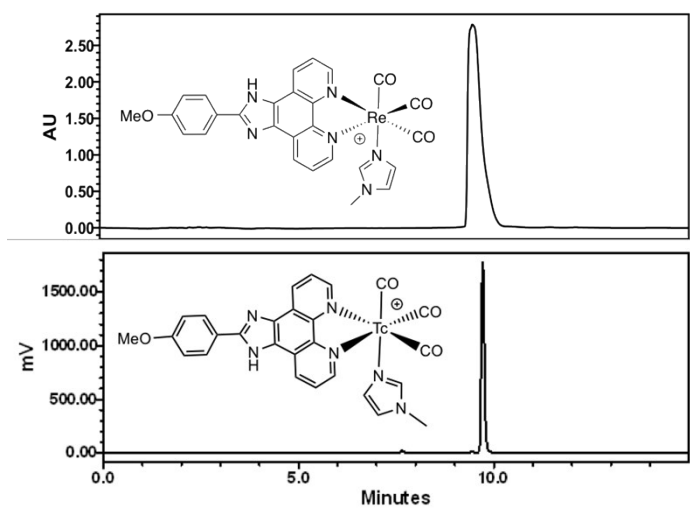

Figure S92. UV-HPLC trace of **5c** (top) and  $\gamma$ -HPLC trace of **7c** (bottom) (Method B).

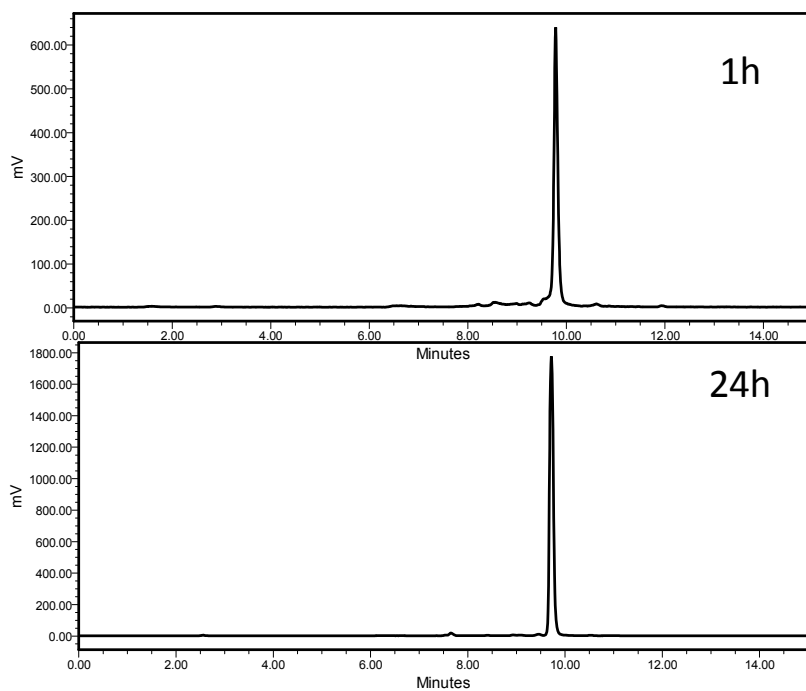

Figure S93.  $\gamma$ -HPLC trace of 7c after 1 and 24 h in saline (Method B).

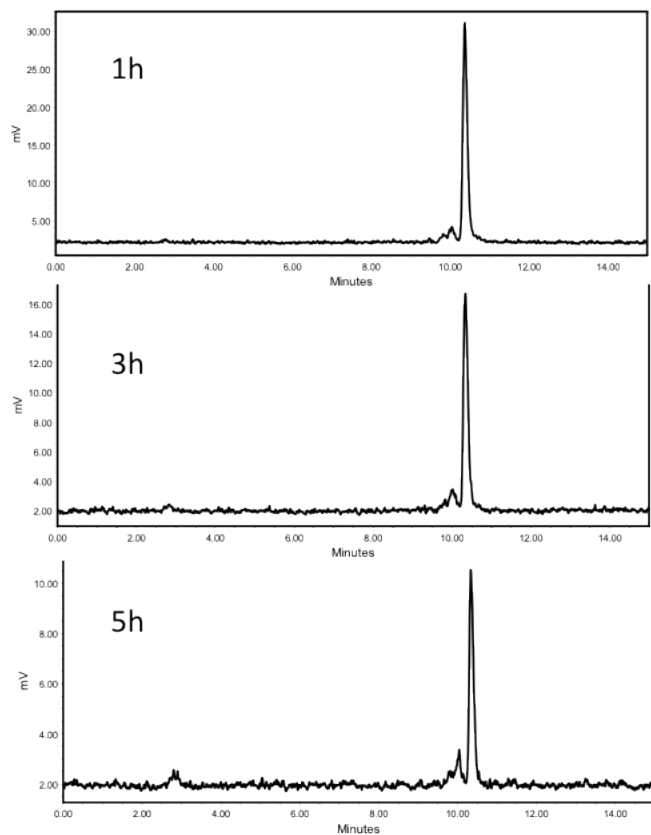

Figure S94.  $\gamma$ -HPLC trace of 7c after 1, 3 and 5 h in histidine (Method B).

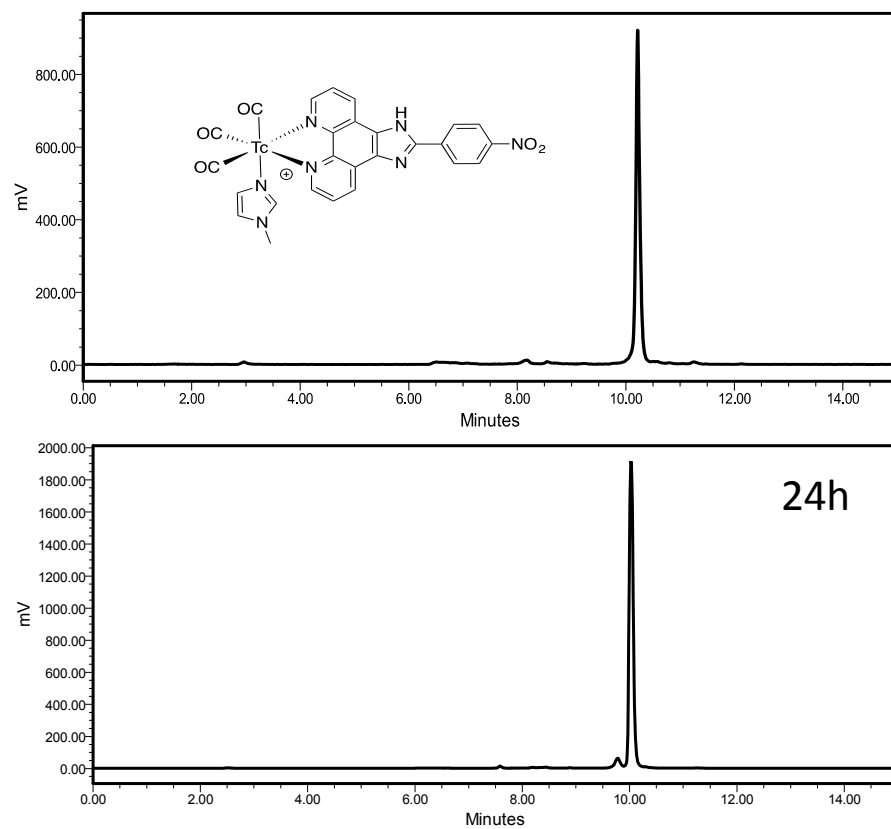

Figure S95.  $\gamma$ -HPLC trace of **7d** before (top) and after 24 h (bottom) in saline (Method B).

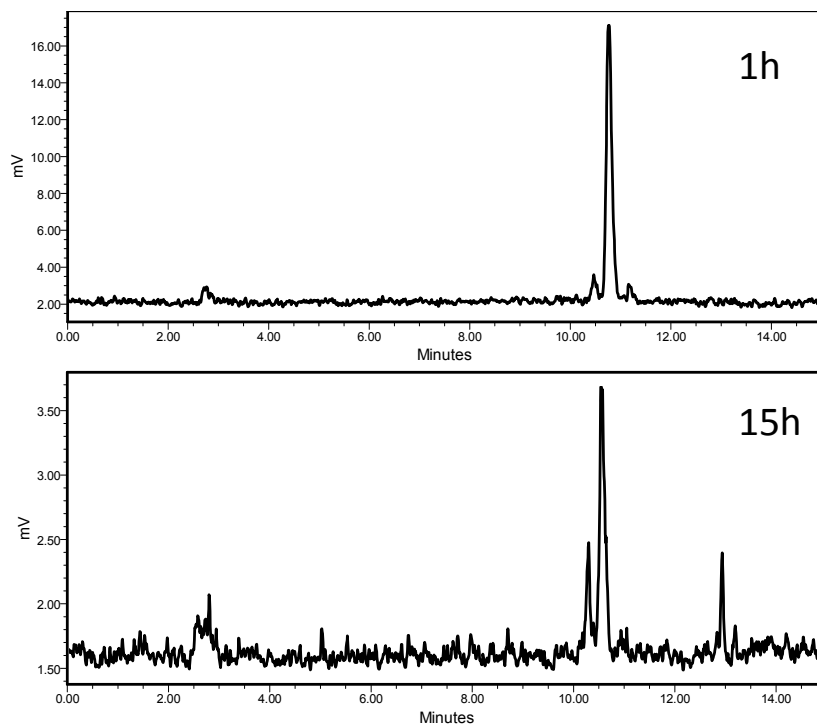

Figure S96.  $\gamma$ -HPLC trace of **7d** after 1 and 15 h in histidine (Method B).

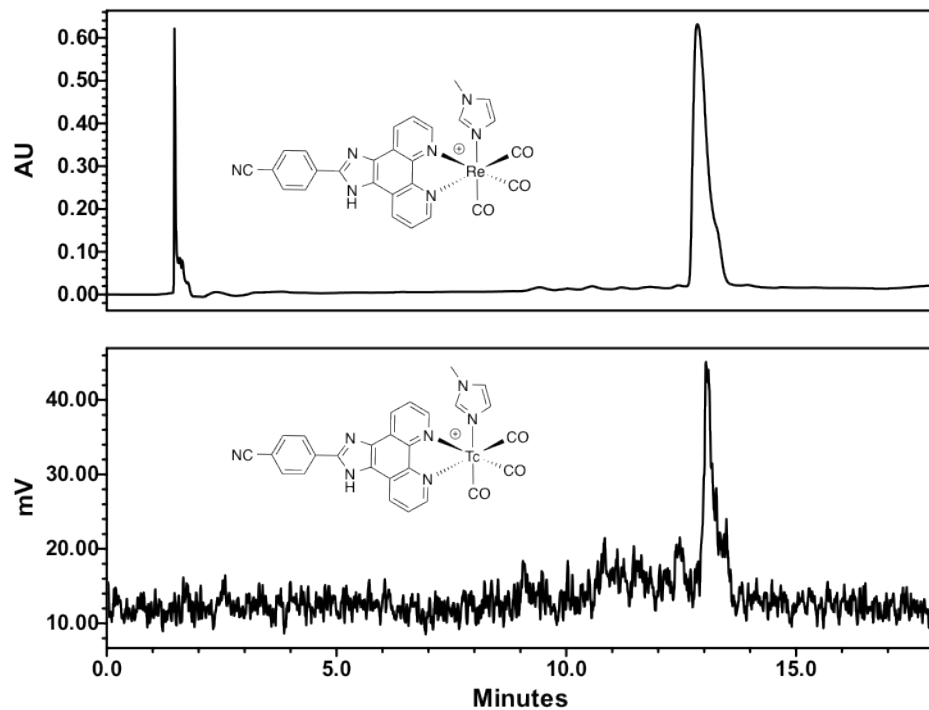

Figure S97. UV-HPLC trace of **5e** (top) and  $\gamma$ -HPLC trace of **7e** (bottom) (Method D).

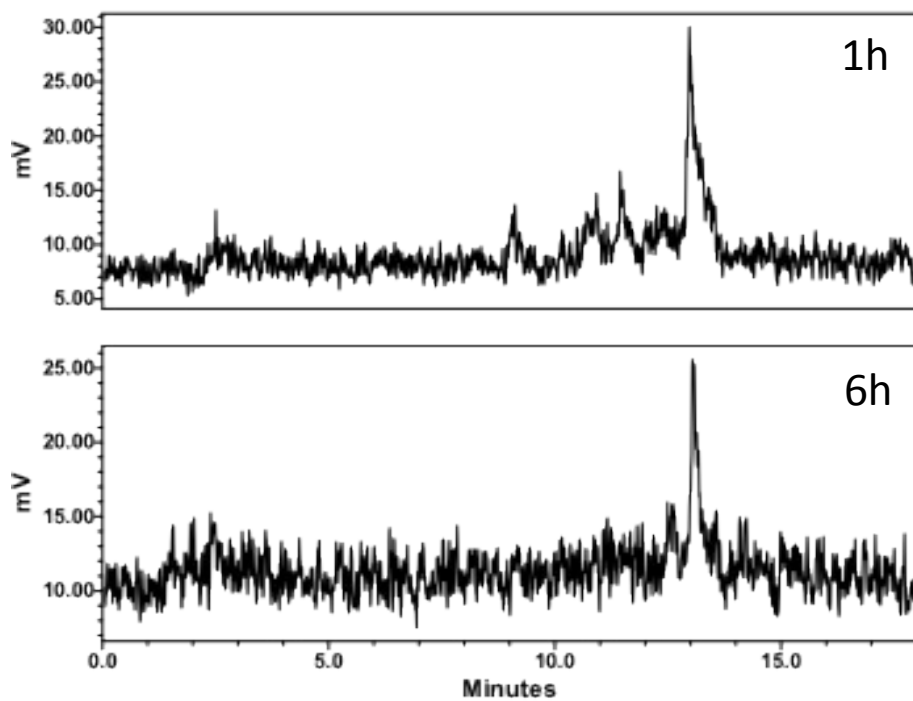

Figure S98.  $\gamma$ -HPLC trace of **7e** after 1 and 6 h in saline (Method D).

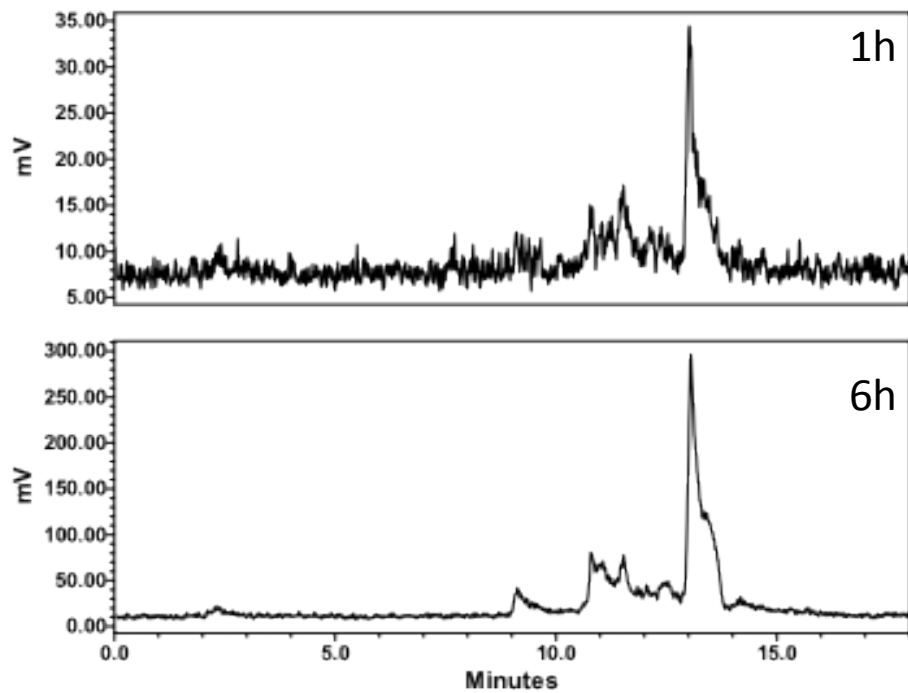

Figure S99.  $\gamma$ -HPLC trace of **7e** after 1 and 6 h in cysteine (Method D).

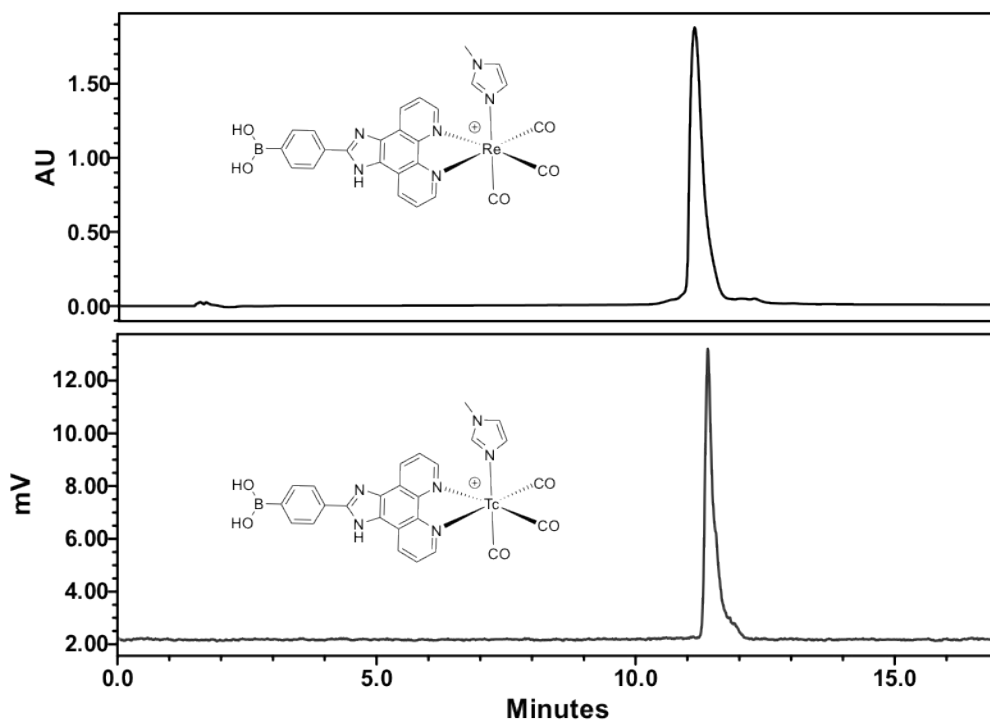

Figure S100. UV-HPLC trace of **5f** (top) and  $\gamma$ -HPLC trace of **7f** (bottom) (Method D).

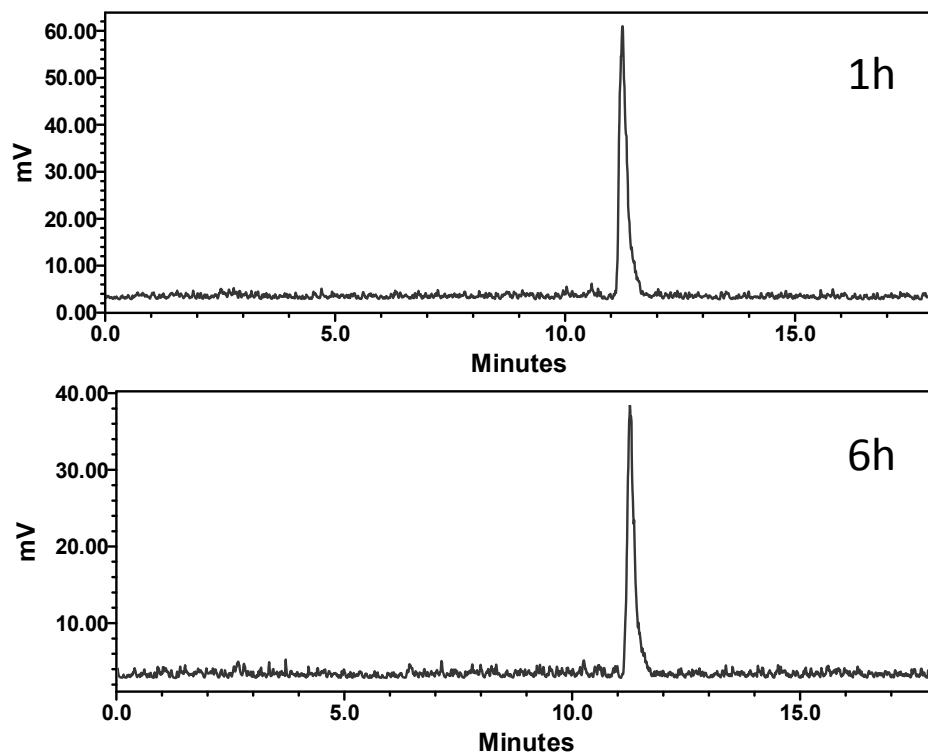

Figure S101.  $\gamma$ -HPLC trace of **7f** after 1 and 6 h in saline (Method D).

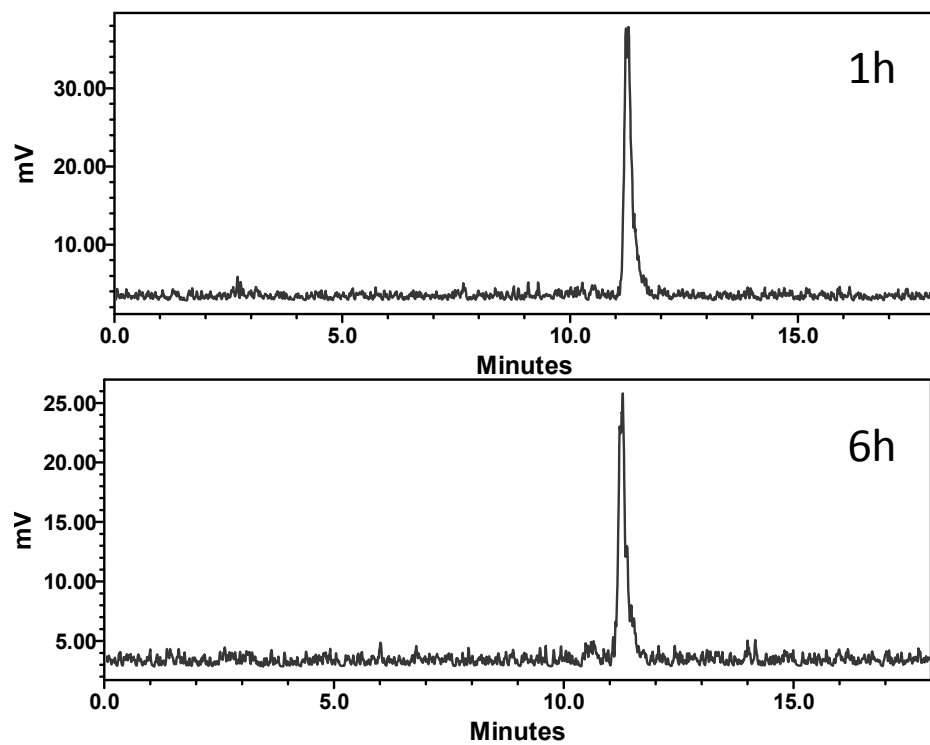

Figure S102.  $\gamma$ -HPLC trace of **7f** after 1 and 6 h in cysteine (Method D).



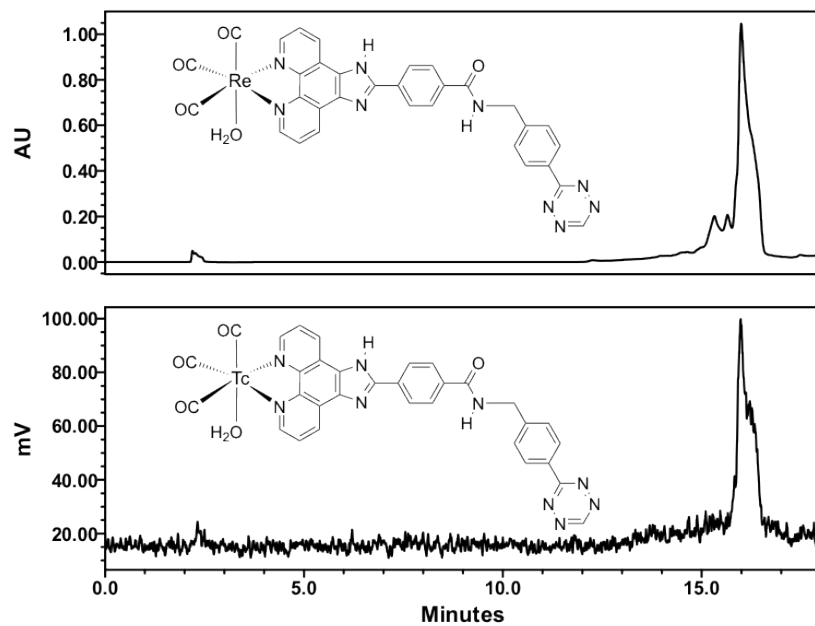

Figure S103. UV-HPLC trace of **10** (top) and  $\gamma$ -HPLC trace of **12** (bottom) (Method C).

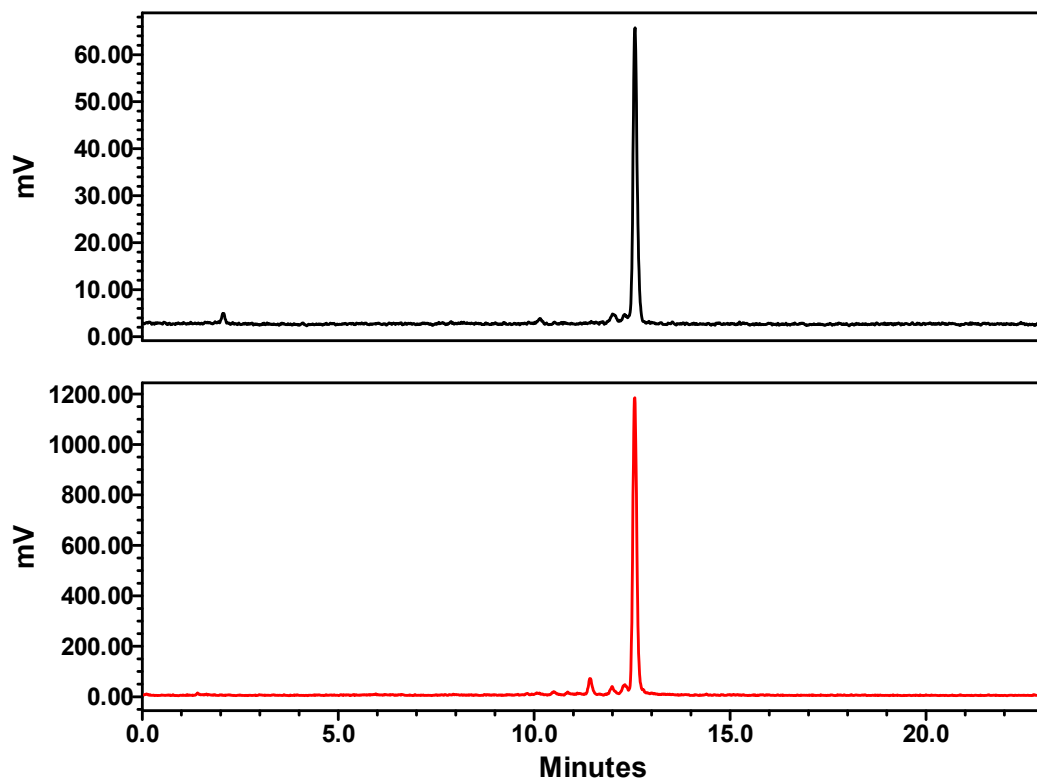

Figure S104.  $\gamma$ -HPLC trace of **12** after 0 and 6 h in saline (Method C).

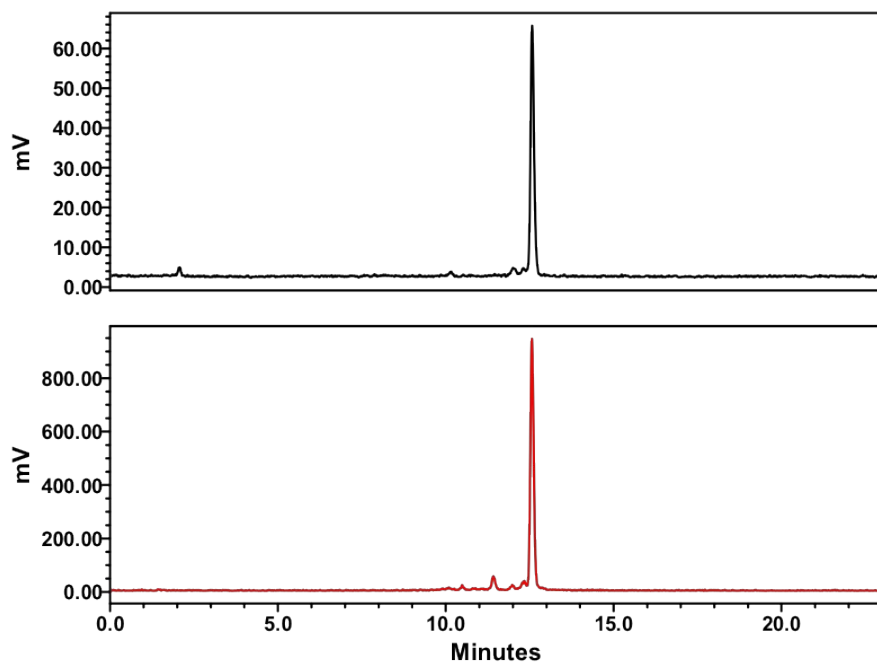

Figure S105.  $\gamma$ -HPLC trace of **12** after 0 and 6 h in cysteine (Method C).

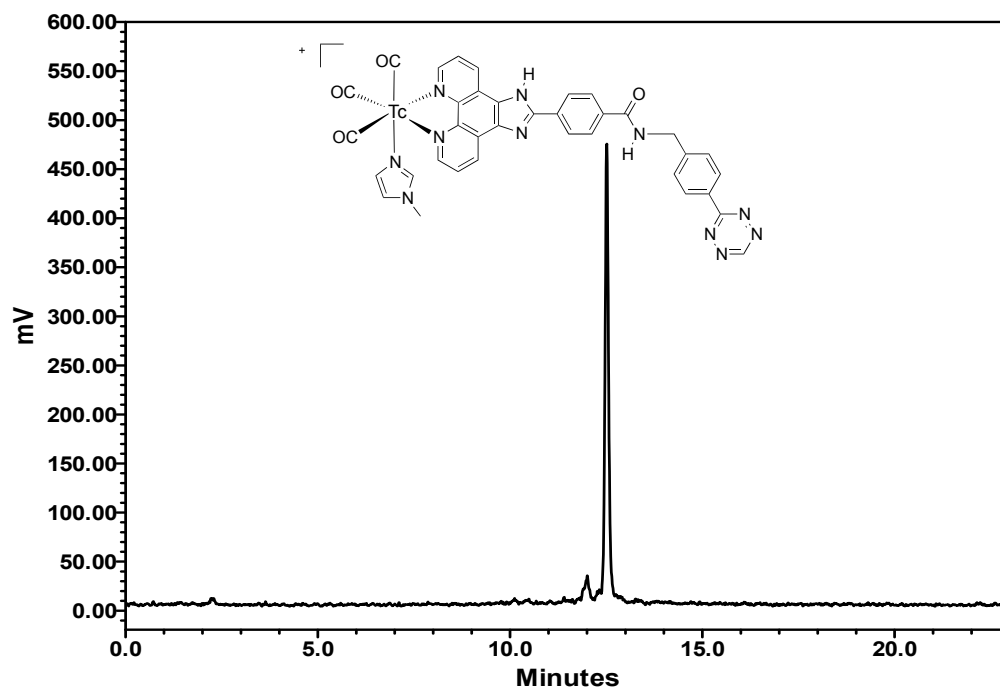

Figure S106.  $\gamma$ -HPLC trace of **13** (Method E).

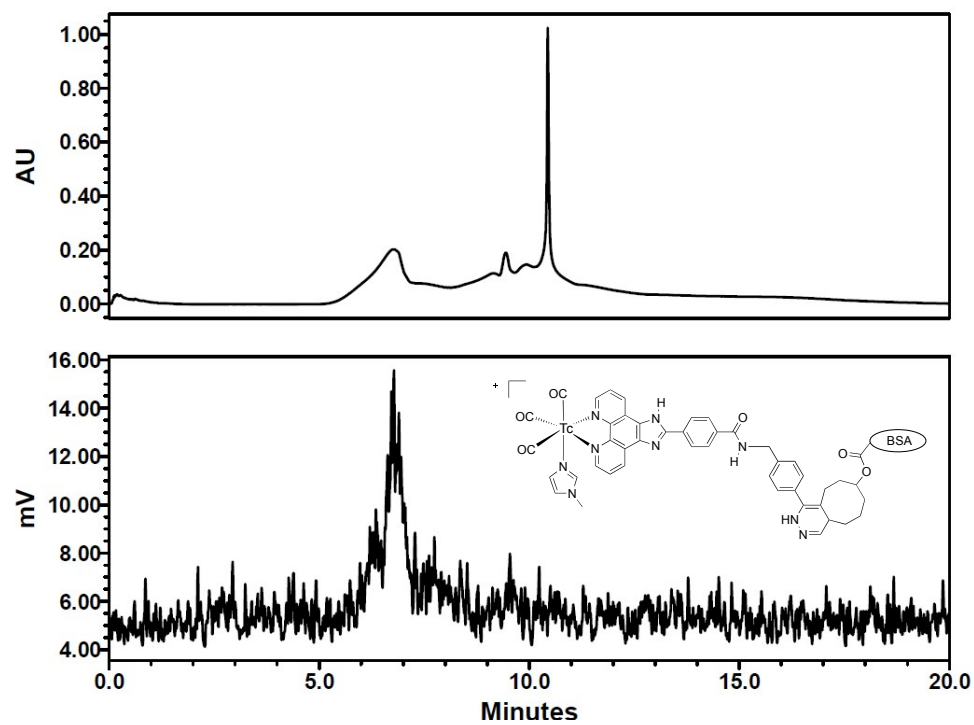

Figure S107. UV-HPLC trace of **15** (top) and  $\gamma$ -HPLC trace of **15** (bottom) (Method F).
